# Supplementary material for: Antibody and cellular therapies for treatment of covid-19: a living systematic review and network meta-analysis
Source: PubMed Central journal article supplement — BMJ. 2021 Sep 24;374:n2231. doi: 10.1136/bmj.n2231 (PMC8459162; doi:10.1136/bmj.n2231), 2021-09-24
Supplement: sier064138.w1.pdf [file sier064138.w1.pdf]

# Antibody and cellular therapies for the treatment of covid-19: A living systematic review and network meta-analysis

## Supplementary Materials

| <b>Table of Contents</b>                                       | <b>Page</b> |
|----------------------------------------------------------------|-------------|
| Search strategy                                                | 2           |
| English search strategy                                        | 2           |
| Chinese search strategy                                        | 9           |
| Description of studies excluded at full-text screening stage   | 11          |
| Additional study characteristics                               | 29          |
| Additional information on studies of convalescent plasma       | 43          |
| Discrepancies between preprints and peer-reviewed publications | 50          |
| Risk of bias assessments                                       | 52          |
| Network plots                                                  | 59          |
| Funnel plot of comparisons with at least ten studies           | 60          |
| Complete network meta-analysis results and GRADE               | 67          |
| Living network meta-analysis protocol and extended methods     | 79          |

## Search strategy

### English search strategy

#### Search Strategy:

| Database                   | Strategy                                                                                                                                                                                                                                                                                                                                                                                                                                                                                                                                                                                                                                                                                                        |
|----------------------------|-----------------------------------------------------------------------------------------------------------------------------------------------------------------------------------------------------------------------------------------------------------------------------------------------------------------------------------------------------------------------------------------------------------------------------------------------------------------------------------------------------------------------------------------------------------------------------------------------------------------------------------------------------------------------------------------------------------------|
| Medline<br>(Ovid)<br>1946- | <p>(coronavir* OR corona virus* OR betacoronavir* OR covid19 OR covid 19 OR nCoV OR novel CoV OR CoV 2 OR CoV2 OR sarscov2 OR 2019nCoV OR wuhan virus*).mp. OR ((wuhan OR hubei OR huanan) AND (severe acute respiratory OR pneumonia*) AND outbreak*).mp. OR Coronavirus Infections/ OR Coronavirus/ OR betacoronavirus/</p> <p>Limits: 2020- OR</p> <p>(novel coronavir* OR novel corona virus* OR covid19 OR covid 19 OR nCoV OR novel CoV OR CoV 2 OR CoV2 OR sarscov2 OR 2019nCoV OR wuhan virus*).mp. OR ((wuhan OR hubei OR huanan) AND (severe acute respiratory OR pneumonia*) AND outbreak*).mp. OR ((wuhan OR hubei OR huanan) AND (coronavir* OR betacoronavir*)).mp.</p> <p>Limits: 2019-</p>      |
| Embase<br>(Ovid)<br>1947-  | <p>(coronavir* OR corona virus* OR betacoronavir* OR covid19 OR covid 19 OR nCoV OR novel CoV OR CoV 2 OR CoV2 OR sarscov2 OR 2019nCoV OR wuhan virus*).mp. OR ((wuhan OR hubei OR huanan) AND (severe acute respiratory OR pneumonia*) AND outbreak*).mp. OR Coronavirus infection/ OR coronavirinae/ OR exp betacoronavirus/</p> <p>Limits: 2020- OR</p> <p>(novel coronavir* OR novel corona virus* OR covid19 OR covid 19 OR nCoV OR novel CoV OR CoV 2 OR CoV2 OR sarscov2 OR 2019nCoV OR wuhan virus*).mp. OR ((wuhan OR hubei OR huanan) AND (severe acute respiratory OR pneumonia*) AND outbreak*).mp. OR ((wuhan OR hubei OR huanan) AND (coronavir* OR betacoronavir*)).mp.</p> <p>Limits: 2019-</p> |

|                                               |                                                                                                                                                                                                                                                                                                                                                                                                                                                                                                                                                                                                                                                                     |
|-----------------------------------------------|---------------------------------------------------------------------------------------------------------------------------------------------------------------------------------------------------------------------------------------------------------------------------------------------------------------------------------------------------------------------------------------------------------------------------------------------------------------------------------------------------------------------------------------------------------------------------------------------------------------------------------------------------------------------|
| <p>CAB<br/>Abstracts<br/>(Ovid)<br/>1910-</p> | <p>(coronavir* OR corona virus* OR betacoronavir* OR covid19 OR covid 19 OR nCoV OR novel CoV OR CoV 2 OR CoV2 OR sarscov2 OR 2019nCoV OR wuhan virus*).mp. OR ((wuhan OR hubei OR huanan) AND (severe acute respiratory OR pneumonia*) AND outbreak*).mp. OR exp Betacoronavirus/</p> <p>Limits: 2020- OR</p> <p>(novel coronavir* OR novel corona virus* OR covid19 OR covid 19 OR nCoV OR novel CoV OR CoV 2 OR CoV2 OR sarscov2 OR 2019nCoV OR wuhan virus*).mp. OR ((wuhan OR hubei OR huanan) AND (severe acute respiratory OR pneumonia*) AND outbreak*).mp. OR ((wuhan OR hubei OR huanan) AND (coronavir* OR betacoronavir*)).mp.</p> <p>Limits: 2019-</p> |
|-----------------------------------------------|---------------------------------------------------------------------------------------------------------------------------------------------------------------------------------------------------------------------------------------------------------------------------------------------------------------------------------------------------------------------------------------------------------------------------------------------------------------------------------------------------------------------------------------------------------------------------------------------------------------------------------------------------------------------|

|                                               |                                                                                                                                                                                                                                                                                                                                                                                                                                                                                                                                                                                                                                                                     |
|-----------------------------------------------|---------------------------------------------------------------------------------------------------------------------------------------------------------------------------------------------------------------------------------------------------------------------------------------------------------------------------------------------------------------------------------------------------------------------------------------------------------------------------------------------------------------------------------------------------------------------------------------------------------------------------------------------------------------------|
| <p>Global<br/>Health<br/>(Ovid)<br/>1910-</p> | <p>(coronavir* OR corona virus* OR betacoronavir* OR covid19 OR covid 19 OR nCoV OR novel CoV OR CoV 2 OR CoV2 OR sarscov2 OR 2019nCoV OR wuhan virus*).mp. OR ((wuhan OR hubei OR huanan) AND (severe acute respiratory OR pneumonia*) AND outbreak*).mp. OR exp Betacoronavirus/</p> <p>Limits: 2020- OR</p> <p>(novel coronavir* OR novel corona virus* OR covid19 OR covid 19 OR nCoV OR novel CoV OR CoV 2 OR CoV2 OR sarscov2 OR 2019nCoV OR wuhan virus*).mp. OR ((wuhan OR hubei OR huanan) AND (severe acute respiratory OR pneumonia*) AND outbreak*).mp. OR ((wuhan OR hubei OR huanan) AND (coronavir* OR betacoronavir*)).mp.</p> <p>Limits: 2019-</p> |
|-----------------------------------------------|---------------------------------------------------------------------------------------------------------------------------------------------------------------------------------------------------------------------------------------------------------------------------------------------------------------------------------------------------------------------------------------------------------------------------------------------------------------------------------------------------------------------------------------------------------------------------------------------------------------------------------------------------------------------|

|                                      |                                                                                                                                                                                                                                                                                                                                                                                                                                                                                                                                                                                                                                             |
|--------------------------------------|---------------------------------------------------------------------------------------------------------------------------------------------------------------------------------------------------------------------------------------------------------------------------------------------------------------------------------------------------------------------------------------------------------------------------------------------------------------------------------------------------------------------------------------------------------------------------------------------------------------------------------------------|
| <p>PsycInfo<br/>(Ovid)<br/>1806-</p> | <p>(coronavir* OR corona virus* OR betacoronavir* OR covid19 OR covid 19 OR nCoV OR novel CoV OR CoV 2 OR CoV2 OR sarscov2 OR 2019nCoV OR wuhan virus*).mp. OR ((wuhan OR hubei OR huanan) AND (severe acute respiratory OR pneumonia*) AND outbreak*).mp.</p> <p>Limits: 2020- OR</p> <p>(novel coronavir* OR novel corona virus* OR covid19 OR covid 19 OR nCoV OR novel CoV OR CoV 2 OR CoV2 OR sarscov2 OR 2019nCoV OR wuhan virus*).mp. OR ((wuhan OR hubei OR huanan) AND (severe acute respiratory OR pneumonia*) AND outbreak*).mp. OR ((wuhan OR hubei OR huanan) AND (coronavir* OR betacoronavir*)).mp.</p> <p>Limits: 2019-</p> |
|--------------------------------------|---------------------------------------------------------------------------------------------------------------------------------------------------------------------------------------------------------------------------------------------------------------------------------------------------------------------------------------------------------------------------------------------------------------------------------------------------------------------------------------------------------------------------------------------------------------------------------------------------------------------------------------------|

|                             |                                                                                                                                                                                                                                                                                                                                                                                                                                                                                                                                                                                                                                                                                                                                                                                                                                                                                  |
|-----------------------------|----------------------------------------------------------------------------------------------------------------------------------------------------------------------------------------------------------------------------------------------------------------------------------------------------------------------------------------------------------------------------------------------------------------------------------------------------------------------------------------------------------------------------------------------------------------------------------------------------------------------------------------------------------------------------------------------------------------------------------------------------------------------------------------------------------------------------------------------------------------------------------|
| <p>Cochrane<br/>Library</p> | <p>#1(coronavir* OR "corona virus" OR betacoronavir* OR covid19 OR "covid 19" OR nCoV OR "CoV 2" OR CoV2 OR sarscov2 OR 2019nCoV OR "novel CoV" OR "wuhan virus"):ti,ab,kw OR ((wuhan OR hubei OR huanan) AND ("severe acute respiratory" OR pneumonia*) AND outbreak*):ti,ab,kw #2MeSH descriptor: [Coronavirus] this term only #3MeSH descriptor: [Coronavirus Infections] this term only #4MeSH descriptor: [Betacoronavirus] this term only #5 #1 OR #2 OR #3 OR#4<br/>Limits: 2020- OR</p> <p>#1 ("novel coronavirus" OR "novel corona virus" OR covid19 OR "covid 19" OR nCoV OR "novel CoV" OR "CoV 2" OR CoV2 OR sarscov2 OR 2019nCoV OR "wuhan virus"):ti,ab,kw OR ((wuhan OR hubei OR huanan) AND ("severe acute respiratory" OR pneumonia*) AND outbreak*):ti,ab,kw OR ((wuhan OR hubei OR huanan) AND (coronavir* OR betacoronavir*)):ti,ab,kw<br/>Limits: 2019-</p> |
|-----------------------------|----------------------------------------------------------------------------------------------------------------------------------------------------------------------------------------------------------------------------------------------------------------------------------------------------------------------------------------------------------------------------------------------------------------------------------------------------------------------------------------------------------------------------------------------------------------------------------------------------------------------------------------------------------------------------------------------------------------------------------------------------------------------------------------------------------------------------------------------------------------------------------|

|                                                     |                                                                                                                                                                                                                                                                                                                                                                                                                                                                                                                                                                                                                                                                                                                                                                                                                                                |
|-----------------------------------------------------|------------------------------------------------------------------------------------------------------------------------------------------------------------------------------------------------------------------------------------------------------------------------------------------------------------------------------------------------------------------------------------------------------------------------------------------------------------------------------------------------------------------------------------------------------------------------------------------------------------------------------------------------------------------------------------------------------------------------------------------------------------------------------------------------------------------------------------------------|
| <p>Scopus<br/>1960-</p>                             | <p>TITLE-ABS-KEY ( coronavir* OR "corona virus" OR betacoronavir* OR covid19 OR "covid 19" OR ncov OR "CoV 2" OR cov2 OR sarscov2 OR 2019ncov OR "novel CoV" OR "wuhan virus" ) OR ( TITLE-ABS-KEY ( wuhan OR hubei OR huanan ) AND TITLE-ABS-KEY ( "severe acute respiratory" OR pneumonia* ) AND TITLE-ABS-KEY ( outbreak* ) ) AND ( LIMIT-TO ( PUBYEAR , 2020 ) )</p> <p>OR</p> <p>TITLE-ABS-KEY ( "novel coronavirus" OR "novel corona virus" OR covid19 OR "covid 19" OR ncov OR "CoV 2" OR cov2 OR sarscov2 OR 2019ncov OR "novel CoV" OR "wuhan virus" ) OR TITLE-ABS-KEY ( ( wuhan OR hubei OR huanan ) AND ( "severe acute respiratory" OR pneumonia* ) AND outbreak* ) OR TITLE-ABS-KEY ( ( wuhan OR hubei OR huanan ) AND ( coronavir* OR betacoronavir* ) ) AND ( LIMIT-TO ( PUBYEAR , 2020 ) OR LIMIT-TO ( PUBYEAR , 2019 ) )</p> |
| <p>Academic<br/>Search<br/>Complete<br/>(Ebsco)</p> | <p>TI,AB,SU( (coronavir* OR "corona virus" OR betacoronavir* OR covid19 OR "covid 19" OR nCoV OR "CoV 2" OR CoV2 OR sarscov2 OR 2019nCoV OR "novel CoV" OR "wuhan virus") OR ((wuhan OR hubei OR huanan) AND ("severe acute respiratory" OR pneumonia*) AND (outbreak*)) )</p> <p>Limits: Dec. 2019-, peer-reviewed</p>                                                                                                                                                                                                                                                                                                                                                                                                                                                                                                                        |
| <p>Africa Wide<br/>Information<br/>(Ebsco)</p>      | <p>TI,AB,SU( (coronavir* OR "corona virus" OR betacoronavir* OR covid19 OR "covid 19" OR nCoV OR "CoV 2" OR CoV2 OR sarscov2 OR 2019nCoV OR "novel CoV" OR "wuhan virus") OR ((wuhan OR hubei OR huanan) AND ("severe acute respiratory" OR pneumonia*) AND (outbreak*)) )</p> <p>Limits: 2020-, peer-reviewed OR</p> <p>TI,AB,SU( ("novel coronavirus" OR "novel corona virus" OR covid19 OR "covid 19" OR nCoV OR "CoV 2" OR CoV2 OR sarscov2 OR 2019nCoV OR "novel CoV" OR "wuhan virus") OR ((wuhan OR hubei OR huanan) AND ("severe acute respiratory" OR pneumonia*) AND outbreak*) OR ((wuhan OR hubei OR huanan) AND (coronavir* OR betacoronavir*)) )</p> <p>Limits: 2019-, peer-reviewed</p>                                                                                                                                         |

|                                            |                                                                                                                                                                                                                                                                                                                                                                                                                                                                         |
|--------------------------------------------|-------------------------------------------------------------------------------------------------------------------------------------------------------------------------------------------------------------------------------------------------------------------------------------------------------------------------------------------------------------------------------------------------------------------------------------------------------------------------|
| CINAHL<br>(Ebsco)                          | <p>TI,AB,SU( (coronavir* OR "corona virus" OR betacoronavir* OR covid19 OR "covid 19" OR nCoV OR "CoV 2" OR CoV2 OR sarscov2 OR 2019nCoV OR "novel CoV" OR "wuhan virus") OR ((wuhan OR hubei OR huanan) AND ("severe acute respiratory" OR pneumonia*) AND (outbreak*)) ) OR (MH "Coronavirus") OR (MH "Coronavirus Infections")</p> <p>Limits: Dec. 2019-, peer-reviewed</p>                                                                                          |
| ProQuest<br>Central<br>(Proquest)<br>1952- | <p>TI,AB,SU( (coronavir* OR "corona virus" OR betacoronavir* OR covid19 OR "covid 19" OR nCoV OR "CoV 2" OR CoV2 OR sarscov2 OR 2019nCoV OR "novel CoV" OR "wuhan virus") OR ((wuhan OR hubei OR huanan) AND ("severe acute respiratory" OR pneumonia*) AND (outbreak*)) )</p> <p>Limits: Dec. 2019-, peer-reviewed</p>                                                                                                                                                 |
| PubMed<br>Central                          | <p>TITLE-ABSTRACT( (coronavirus OR "corona virus" OR coronavirinae OR coronaviridae OR betacoronavirus OR covid19 OR "covid 19" OR nCoV OR "CoV 2" OR CoV2 OR sarscov2 OR 2019nCoV OR "novel CoV" OR "wuhan virus" ) OR ((wuhan OR hubei OR huanan) AND ( "severe acute respiratory" OR pneumonia ) AND (outbreak)) ) OR "COVID-19" [Supplementary Concept] OR "severe acute respiratory syndrome coronavirus 2" [Supplementary Concept]</p> <p>Limits: Dec. 2019-</p>  |
| Medline<br>(PubMed)                        | <p>TITLE-ABSTRACT( ( coronavirus OR "corona virus" OR coronavirinae OR coronaviridae OR betacoronavirus OR covid19 OR "covid 19" OR nCoV OR "CoV 2" OR CoV2 OR sarscov2 OR 2019nCoV OR "novel CoV" OR "wuhan virus" ) OR ((wuhan OR hubei OR huanan) AND ( "severe acute respiratory" OR pneumonia ) AND (outbreak)) ) OR "COVID-19" [Supplementary Concept] OR "severe acute respiratory syndrome coronavirus 2" [Supplementary Concept]</p> <p>Limits: Dec. 2019-</p> |

|                   |                                                                                                                            |
|-------------------|----------------------------------------------------------------------------------------------------------------------------|
| LitCovid<br>(NLM) | <p><a href="https://www.ncbi.nlm.nih.gov/research/coronavirus/">https://www.ncbi.nlm.nih.gov/research/coronavirus/</a></p> |
|-------------------|----------------------------------------------------------------------------------------------------------------------------|

|                                            |                                                                                                                                                                                                                                                                                                                                                                                                                                                                                                                                                                                                                                                                                                                                                                                                                                                                                                                                                                                      |
|--------------------------------------------|--------------------------------------------------------------------------------------------------------------------------------------------------------------------------------------------------------------------------------------------------------------------------------------------------------------------------------------------------------------------------------------------------------------------------------------------------------------------------------------------------------------------------------------------------------------------------------------------------------------------------------------------------------------------------------------------------------------------------------------------------------------------------------------------------------------------------------------------------------------------------------------------------------------------------------------------------------------------------------------|
| SciFinder<br>(CAS)                         | <p>References ( coronavir* OR "corona virus" OR betacoronavir* OR covid19 OR covid OR nCoV OR "CoV 2" OR CoV2 OR sarscov2 OR 2019nCoV OR "novel CoV" OR "wuhan virus" )</p> <p>Limits: 2020- OR</p> <p>References ( "novel coronavirus" OR "novel corona virus" OR covid19 OR covid OR nCoV OR "CoV 2" OR CoV2 OR sarscov2 OR 2019nCoV OR "novel CoV" OR "wuhan virus" )</p> <p>Limits: 2019-</p>                                                                                                                                                                                                                                                                                                                                                                                                                                                                                                                                                                                    |
| Virtual<br>Health<br>Library<br>(WHO)      | <p>Filter VHL created:<br/><a href="https://bvsalud.org/vitrinas/post_vitrines/novo_coronavirus/">https://bvsalud.org/vitrinas/post_vitrines/novo_coronavirus/</a> <b>Database changed on 6/16/2020 and integrated into the larger WHO database</b></p> <p>Limited: 2019- OR</p> <p>TI,AB:( (coronavirus OR "corona virus" OR coronavirinae OR coronaviridae OR betacoronavirus OR covid19 OR "covid 19" OR nCoV OR "CoV 2" OR CoV2 OR sarscov2 OR 2019nCoV OR "novel CoV" OR "wuhan virus" ) OR ((wuhan OR hubei OR huanan) AND ("severe acute respiratory" OR pneumonia) AND (outbreak)) )</p> <p>Limits: 2020- OR</p> <p>TI,AB( "novel coronavirus" OR "novel corona virus" OR covid19 OR "covid 19" OR nCoV OR "CoV 2" OR CoV2 OR sarscov2 OR 2019nCoV OR "novel CoV" OR "wuhan virus") OR ((wuhan OR hubei OR huanan) AND ("severe acute respiratory" OR pneumonia) AND outbreak) OR ((wuhan OR hubei OR huanan) AND (coronavirus OR betacoronavirus))</p> <p>Limits: 2019-</p> |
| <a href="#">WHO Novel Coronavirus page</a> | <p>Download of their global research on COVID 19 database:<br/><a href="https://www.who.int/emergencies/diseases/novel-coronavirus-2019/global-research-on-novel-coronavirus-2019-ncov">https://www.who.int/emergencies/diseases/novel-coronavirus-2019/global-research-on-novel-coronavirus-2019-ncov</a></p>                                                                                                                                                                                                                                                                                                                                                                                                                                                                                                                                                                                                                                                                       |

|                                                                                               |                                                                                                                                                                                         |
|-----------------------------------------------------------------------------------------------|-----------------------------------------------------------------------------------------------------------------------------------------------------------------------------------------|
|                                                                                               | OR<br>Hand search                                                                                                                                                                       |
| <a href="#">CDC Novel Coronavirus page</a>                                                    | <a href="https://www.cdc.gov/coronavirus/2019-ncov/publications.html">https://www.cdc.gov/coronavirus/2019-ncov/publications.html</a> OR<br>Hand search                                 |
| EuroSurveillance                                                                              | <a href="https://www.eurosurveillance.org/content/2019-ncov?pageSize=100&amp;page=1">https://www.eurosurveillance.org/content/2019-ncov?pageSize=100&amp;page=1</a>                     |
| <a href="#">China CDC MMWR</a>                                                                | Hand search                                                                                                                                                                             |
| Homeland Security Digital Library                                                             | Title or Summary: Coronavirus OR “Corona virus” OR Betacoronavirus OR Coronaviridae OR coronavirinae OR Covid OR Covid19 OR nCoV OR CoV OR CoV2 OR Wuhan<br>Limits: 2019-               |
| ClinicalTrials                                                                                | Condition, disease, other term: Coronavirus OR “Corona virus” OR Betacoronavirus OR Coronaviridae OR coronavirinae OR Covid OR Covid19 OR nCoV OR CoV OR CoV2 OR Wuhan<br>Limits: 2019- |
| <a href="#">bioRxiv</a><br><a href="#">medRxiv</a><br><a href="#">chemRxiv</a><br>(preprints) | Condition, disease, other term: Coronavirus OR “Corona virus” OR Betacoronavirus OR Coronaviridae OR coronavirinae OR Covid OR Covid19 OR nCoV OR CoV OR CoV2 OR Wuhan<br>Limits: 2019- |
| <a href="#">SSRN</a><br>(preprints)                                                           | Condition, disease, other term: Coronavirus OR “Corona virus” OR Betacoronavirus OR Coronaviridae OR coronavirinae OR Covid OR Covid19 OR nCoV OR CoV OR CoV2 OR Wuhan<br>Limits: 2019- |



## Search Strategy for Chinese databases

### 中文数据库检索策略及结果

| Database                                 | Strategy                                                                                                                                                                                                                                                                                                                                                                                                                                                             |
|------------------------------------------|----------------------------------------------------------------------------------------------------------------------------------------------------------------------------------------------------------------------------------------------------------------------------------------------------------------------------------------------------------------------------------------------------------------------------------------------------------------------|
| WanFang 万方医学<br>(med.wanfangdata.com.cn) | <p>#1 (主题:(2019冠状病毒 OR 新型冠状病毒 OR 新冠肺炎)*主题:(临床试验 OR 系统评价 OR Meta分析 OR 随机对照实验 OR 对照研究))*Date:2019-</p> <p>#2 (主题:(2019-nCoV OR SARS-CoV-2 OR Novel coronavirus OR nCoV OR new coronavirus)*主题:(临床试验 OR 系统评价 OR Meta分析 OR 随机对照实验 OR 对照研究))*Date:2019-</p> <p>#3 #1 OR #2</p>                                                                                                                                                                                            |
| CBM                                      | <p><u>((("2019冠状病毒"[常用字段:智能] OR "新型冠状病毒"[常用字段:智能] OR "新冠肺炎"[常用字段:智能] OR "2019-nCoV"[常用字段:智能] OR "SARS-CoV-2"[常用字段:智能] OR "Novel coronavirus"[常用字段:智能] OR "nCoV"[常用字段:智能] OR "Emerging Coronaviruses"[常用字段:智能] OR "new coronavirus"[常用字段:智能] OR "COVID-19"[常用字段:智能] OR "coronavirus"[常用字段:智能] AND ( "Wuhan"[常用字段] OR "Hubei"[常用字段] OR "China"[常用字段])) AND 2019-2020[日期]) AND ("循证文献"[文献类型] OR "临床试验"[文献类型] OR "随机对照试验"[文献类型] OR "综述"[文献类型] OR "Meta分析"[文献类型])</u></p> |
| CNKI                                     | <p>在期刊文献类型下：</p> <p>#1主题=(<u>"2019冠状病毒" OR "新型冠状病毒" OR "新冠肺炎"</u>) AND (主题=<u>临床试验 OR 系统评价 OR 随机对照实验 OR Meta分析</u>)</p> <p>#2主题=(<u>2019-nCoV OR SARS-CoV-2 OR Novel coronavirus OR nCoV</u>) AND (主题=<u>临床试验 OR 系统评价 OR 随机对照实验 OR Meta分析</u>)</p> <p>2019-[日期]</p>                                                                                                                                                                                                  |
| VIP 维普                                   | <p>#1 (主题:(2019冠状病毒 OR 新型冠状病毒 OR 新冠肺炎)*主题:(临床试验 OR 系统评价 OR Meta分析 OR 随机对照实验 OR 对照研究))*</p>                                                                                                                                                                                                                                                                                                                                                                           |

|                                                                                                                       |                                                                                                                                                                                                                                       |
|-----------------------------------------------------------------------------------------------------------------------|---------------------------------------------------------------------------------------------------------------------------------------------------------------------------------------------------------------------------------------|
|                                                                                                                       | <p>#2 <u>主题=( SARS-CoV-2 OR Novel coronavirus OR nCoV) AND (主题=临床试验 OR 系统评价 OR 随机对照实验 OR Meta分析)</u><br/> Date:2019-</p>                                                                                                              |
| <p>中华医学期刊网 (预印本)<br/> <a href="http://medjournals.cn/2019NCP/index.do">http://medjournals.cn/2019NCP/index.do</a></p> | <p>#1主题=("<u>2019冠状病毒" OR "新型冠状病毒" OR "新冠肺炎"</u>)<br/> AND (主题=临床试验 OR 系统评价 OR 随机对照实验 OR Meta分析)<br/> #2主题=(<u>2019-nCoV OR SARS-CoV-2 OR Novel coronavirus OR nCoV</u>) AND (主题=临床试验 OR 系统评价 OR 随机对照实验 OR Meta分析)<br/> 2019-[日期]</p> |
| <p>中科院预印本<br/> <a href="http://chinaxiv.org/home.htm">http://chinaxiv.org/home.htm</a></p>                            | <p><u>Hand search.</u></p>                                                                                                                                                                                                            |

### Table of studies excluded at full text screening stage (n=440)

This table does not list 30 prophylaxis and 500 drug treatment studies, which are ineligible for the antiviral antibody and cellular treatment network meta-analysis, but are each included in their own respective network meta-analysis. References available upon request.

| Study                 | Title                                                                                                                                                                                       | Reason for exclusion    |
|-----------------------|---------------------------------------------------------------------------------------------------------------------------------------------------------------------------------------------|-------------------------|
| Li 2020               | Evaluation of low-dose CT protocol of novel coronavirus pneumonia based on infection prevention and control                                                                                 | Diagnostic imaging      |
| Luo 2020              | Application of chest low-dose CT screening of Corona Virus Disease 2019 with a third-generation dual-source scanner                                                                         | Diagnostic imaging      |
| Li 2020               | Application of CareDose 4D combined with Karl 3D technology in the low dose computed tomography for the follow-up of COVID-19                                                               | Diagnostic imaging      |
| Gonzalez-Gerez 2021   | Short-Term Effects of a Respiratory Telerehabilitation Program in Confined COVID-19 Patients in the Acute Phase: A Pilot Study                                                              | Exercise/rehabilitation |
| Rodriguez-Blanco 2021 | Short-Term Effects of a Conditioning Telerehabilitation Program in Confined Patients Affected by COVID-19 in the Acute Phase. A Pilot Randomized Controlled Trial                           | Exercise/rehabilitation |
| Tian 2021             | Efficacy and safety of short-wave diathermy treatment for moderate COVID-19 patients: a prospective, double-blind, randomized controlled clinical study                                     | Exercise/rehabilitation |
| Ozlu 2021             | The effects of progressive muscle relaxation exercises on the anxiety and sleep quality of patients with COVID-19: A randomized controlled study                                            | Exercise/rehabilitation |
| Liangjianghuang 2021  | Ultra-short-wave diathermy shortens the course of moderate and severe COVID-19: a randomized controlled trial                                                                               | Exercise/rehabilitation |
| De Marchi 2020        | Effects of photobiomodulation therapy combined with static magnetic field (PBMT-sMF) in patients with severe COVID-19 requiring intubation: a pragmatic randomized placebo-controlled trial | Exercise/rehabilitation |
| Liu 2020              | [Significance and operation mode of moxibustion intervention for the group under quarantine after close contact with COVID-19]                                                              | Exercise/rehabilitation |
| Liu 2020              | Effects of progressive muscle relaxation on anxiety and sleep quality in patients with COVID-19                                                                                             | Exercise/rehabilitation |
| Wanfangdan 2020       | Influence of Baduanjin on the health effects of patients with cold-dampness-stagnation type of new coronavirus pneumonia                                                                    | Exercise/rehabilitation |
| Supady 2021           | Cytokine adsorption in patients with severe COVID-19 pneumonia requiring extracorporeal membrane oxygenation (CYCOV): a single centre, open-label, randomised, controlled trial.            | External organ support  |
| Bosch 2021            | Effect of dexamethasone on direct Xa-inhibitor oral anticoagulant plasma levels in patients with COVID-19                                                                                   | Not a randomized trial  |
| Jin 2021              | Retraction Note to: Methylene blue photochemical treatment as a reliable SARS-CoV-2 plasma virus inactivation method for blood safety and convalescent plasma therapy for COVID-19.         | Not a randomized trial  |
| Karina 2021           | The Effect of Intravenous Autologous Activated Platelet-Rich Plasma Therapy on "Profibrotic Cytokine" IL-1 $\leq$ Levels in Severe and Critical COVID-19 Patients: A Preliminary Study      | Not a randomized trial  |
| Avdeev 2021           | N-acetylcysteine for the treatment of COVID-19 among hospitalized patients                                                                                                                  | Not a randomized trial  |
| Umemura 2021          | Efficacy and safety of nintedanib for pulmonary fibrosis in severe pneumonia induced by COVID-19: An interventional study.                                                                  | Not a randomized trial  |
| Kim 2021              | Dexamethasone may improve severe COVID-19 via ameliorating endothelial injury and inflammation: A preliminary pilot study.                                                                  | Not a randomized trial  |
| Lanthier 2021         | [In patients hospitalized for COVID-19 with hypoxia and systemic inflammation, does tocilizumab reduce 28-days mortality compared to standard treatment, and is it safe?]                   | Not a randomized trial  |
| Hulbert 2021          | Respiratory disease, and treatment / thematic poster session a novel approach to medical monitoring during the sars-cov-2 pandemic supporting the activ 4b outpatient anticoagulation trial | Not a randomized trial  |

|                   |                                                                                                                                                                             |                        |
|-------------------|-----------------------------------------------------------------------------------------------------------------------------------------------------------------------------|------------------------|
| Vityala 2021      | Potential effects of itolizumab treatment on plasma interleukin-6 levels in patients with severe COVID-19.                                                                  | Not a randomized trial |
| Collins 2021      | Administration of COVID-19 convalescent plasma in a metropolitan health care system                                                                                         | Not a randomized trial |
| Youssef 2021      | Vip in the treatment of critical COVID-19 respiratory failure in patients with severe comorbidities                                                                         | Not a randomized trial |
| AlShehry 2021     | Safety and Efficacy of Convalescent Plasma for Severe COVID-19: Interim Report of a Multicenter Phase II Study from Saudi Arabia (vol 9, pg 16, 2021)                       | Not a randomized trial |
| McQuade 2021      | ChAdOx1 nCoV-19 vaccine: asymptomatic efficacy estimates                                                                                                                    | Not a randomized trial |
| Richier 2021      | Efficacitv© du Tocilizumab dans la COVID-19--†modv©rv©e vt sv©w®re-†: une cohorte franvßaise exposv©-non exposv©                                                            | Not a randomized trial |
| Patchen 2021      | Genetically Predicted Serum Vitamin D and COVID-19: A Mendelian Randomization Study                                                                                         | Not a randomized trial |
| Spagnuolo 2021    | Viral clearance after early corticosteroid treatment in patients with moderate or severe covid-19 (vol 10, 21291, 2020)                                                     | Not a randomized trial |
| Diaz 2020         | Geographical disparities in clinical outcomes of severe COVID-19 patients treated with remdesivir                                                                           | Not a randomized trial |
| Meister 2021      | Virucidal Efficacy of Different Oral Rinses Against Severe Acute Respiratory Syndrome Coronavirus 2 (vol 222, pg 1289, 2020)                                                | Not a randomized trial |
| Selvaraj 2021     | Tocilizumab in Hospitalized Patients with COVID-19: A Meta Analysis of Randomized Controlled Trials                                                                         | Not a randomized trial |
| Bian 2021         | Safety and efficacy of meplazumab in healthy volunteers and COVID-19 patients: a randomized phase 1 and an exploratory phase 2 trial.                                       | Not a randomized trial |
| Castagna 2020     | Baseline characteristics associated with clinical improvement and mortality in hospitalized patients with moderate COVID-19                                                 | Not a randomized trial |
| English 2021      | Results of the cellular immuno-therapy for covid-19 related acute respiratory distress syndrome (circa-phase i trial)                                                       | Not a randomized trial |
| Arrieta 2021      | Safety and Antibody Kinetics of COVID-19 Convalescent Plasma for the Treatment of Moderate to Severe Cases of SARS-CoV-2 Infection in Pediatric Patients.                   | Not a randomized trial |
| Bakhshaliyev 2021 | The impact of hydroxychloroquine-azithromycin combination on Tpeak-to-end and Tpeak-to-end/QT ratio during a short treatment course.                                        | Not a randomized trial |
| Hashemian 2020    | Blood purification techniques, inflammatory mediators and mortality in COVID-19 patients                                                                                    | Not a randomized trial |
| Abu-Raddad 2021   | Effectiveness of the BNT162b2 Covid-19 Vaccine against the B.1.1.7 and B.1.351 Variants.                                                                                    | Not a randomized trial |
| Okumus 2021       | Evaluation of the effectiveness and safety of adding ivermectin to treatment in severe COVID-19 patients.                                                                   | Not a randomized trial |
| Pulsipher 2021    | Remdesivir Use in COVID-19 Patients: Cutaneous Adverse Effect or Disease Manifestation?                                                                                     | Not a randomized trial |
| Padilla 2021      | Clinical Outcomes of COVID-19 Patients Treated with Convalescent Plasma or Remdesivir Alone and in Combination at a Community Hospital in California&#039;s Central Valley. | Not a randomized trial |
| Wang 2021         | Safety and immunogenicity of COVID-19 vaccination in patients with non-alcoholic fatty liver disease (CHESS2101): a multicenter study                                       | Not a randomized trial |
| Kvðrper 2021      | Donors for SARS-CoV-2 Convalescent Plasma for a Controlled Clinical Trial: Donor Characteristics, Content and Time Course of SARS-CoV-2 Neutralizing Antibodies             | Not a randomized trial |
| Kamran 2021       | Clearing the Fog: Is Hydroxychloroquine Effective in Reducing Coronavirus Disease-2019 Progression? A Randomized Controlled Trial                                           | Not a randomized trial |
| Arribas 2020      | Impact of concomitant hydroxychloroquine use on safety and efficacy of remdesivir in moderate COVID-19 patients                                                             | Not a randomized trial |
| Efimov 2021       | The effect of azoximer bromide (Polyoxidonium~Æ) in patients hospitalized with coronavirus disease (COVID-19): an open-label, multicentre, interventional clinical study    | Not a randomized trial |
| Agusti 2021       | Early treatment with inhaled budesonide to prevent clinical deterioration in patients with COVID-19                                                                         | Not a randomized trial |
| Caracciolo 2021   | Efficacy and Effect of Inhaled Adenosine Treatment in Hospitalized COVID-19 Patients.                                                                                       | Not a randomized trial |

|                       |                                                                                                                                                                                                                                                                     |                        |
|-----------------------|---------------------------------------------------------------------------------------------------------------------------------------------------------------------------------------------------------------------------------------------------------------------|------------------------|
| Chowdhury 2021        | A Comparative Study on Ivermectin-Doxycycline and Hydroxychloroquine-Azithromycin Therapy on COVID-19 Patients                                                                                                                                                      | Not a randomized trial |
| Lin 2021              | Decreased mortality in acute respiratory distress syndrome patients treated with corticosteroids: an updated meta-analysis of randomized clinical trials with trial sequential analysis                                                                             | Not a randomized trial |
| Majewski 2021         | Chloroquine and hydroxychloroquine - safety profile of potential COVID-19 drugs from the rheumatologist's perspective.                                                                                                                                              | Not a randomized trial |
| Goldberg 2021         | A real-life setting evaluation of the effect of remdesivir on viral load in COVID-19 patients admitted to a large tertiary centre in Israel.                                                                                                                        | Not a randomized trial |
| Altuntas 2021         | Convalescent plasma therapy in patients with COVID-19                                                                                                                                                                                                               | Not a randomized trial |
| Kow 2021              | The association between the use of ivermectin and mortality in patients with COVID-19: a meta-analysis.                                                                                                                                                             | Not a randomized trial |
| Meza 2021             | Angiotensin-converting-enzyme inhibitors and angiotensin II receptor blockers for COVID-19: A living systematic review of randomized clinical trials                                                                                                                | Not a randomized trial |
| Benenson 2021         | BNT162b2 mRNA Covid-19 Vaccine Effectiveness among Health Care Workers.                                                                                                                                                                                             | Not a randomized trial |
| Bradley 2021          | Antibody Responses after a Single Dose of SARS-CoV-2 mRNA Vaccine.                                                                                                                                                                                                  | Not a randomized trial |
| Wei 2020              | Early antiviral therapy of abidol combined with lopinavir/ritonavir and recombinant interferon $\alpha$ -2b for patients with COVID-19 in Zhejiang: A multicenter prospective study                                                                                 | Not a randomized trial |
| Latorre 2021          | 4CPS-338, Use and efficacy of tocilizumab in patients with severe COVID-19 pneumonia                                                                                                                                                                                | Not a randomized trial |
| Aleem 2021            | Hepatic manifestations of COVID-19 and effect of remdesivir on liver function in patients with COVID-19 illness                                                                                                                                                     | Not a randomized trial |
| Chavarria 2021        | Antioxidants and pentoxifylline as adjuvant measures to standard therapy to improve prognosis of patients with pneumonia by COVID-19                                                                                                                                | Not a randomized trial |
| Hernandez-Cedeno 2021 | CIGB-258, a peptide derived from human heat-shock protein 60, decreases hyperinflammation in COVID-19 patients.                                                                                                                                                     | Not a randomized trial |
| Perez-Jacobo 2020     | Phase I and Preliminary Results of a Phase II Study (TERAPLASCoV2) of Convalescent Plasma in Patients with Severe and Life-Threatening Pneumonia Caused By Sars-Cov-2                                                                                               | Not a randomized trial |
| Vergori 2020          | Prophylactic dose of low-molecular-weight heparin (LMWH) might not be sufficient to mitigate the clinical scenario in patients with COVID-19 and severe pneumonia                                                                                                   | Not a randomized trial |
| Gupta 2020            | Determining the usage and efficacy of COVID-19 convalescent plasma harvested at our blood centre                                                                                                                                                                    | Not a randomized trial |
| Donato 2021           | Clinical and laboratory evaluation of patients with SARS-CoV-2 pneumonia treated with high-titer convalescent plasma.                                                                                                                                               | Not a randomized trial |
| Mammen 2021           | Assessing of the Factors Associated with Mortality Among the Patients of PLACID Trial (A Phase II, Open Label, Randomized Controlled Trial to Assess the Safety and Efficacy of Convalescent Plasma to Limit COVID-19 Associated Complications in Moderate Disease) | Not a randomized trial |
| Vowels 2021           | Partner Support and Goal Outcomes during COVID-19: A Mixed Methods Study                                                                                                                                                                                            | Not a randomized trial |
| Wakita 2021           | Comparison of the clinical performance and usefulness of five SARS-CoV-2 antibody tests.                                                                                                                                                                            | Not a randomized trial |
| Abou-Arab 2021        | Microvascular flow alterations in critically ill COVID-19 patients: A prospective study.                                                                                                                                                                            | Not a randomized trial |
| Alemanno 2021         | COVID-19 cognitive deficits after respiratory assistance in the subacute phase: A COVID-rehabilitation unit experience.                                                                                                                                             | Not a randomized trial |
| Liu 2021              | Arbidol combined with the Chinese medicine Lianhuaqingwen capsule versus arbidol alone in the treatment of COVID-19.                                                                                                                                                | Not a randomized trial |
| Hariri 2021           | Rate control in atrial fibrillation using Landiolol is safe in critically ill Covid-19 patients.                                                                                                                                                                    | Not a randomized trial |
| Singh 2021            | The outcome of fluticasone nasal spray on anosmia and triamcinolone oral paste in dysgeusia in COVID-19 patients.                                                                                                                                                   | Not a randomized trial |
| Acosta-Ampudia 2021   | COVID-19 convalescent plasma composition and immunological effects in severe patients                                                                                                                                                                               | Not a randomized trial |

|                           |                                                                                                                                                                                                                                     |                        |
|---------------------------|-------------------------------------------------------------------------------------------------------------------------------------------------------------------------------------------------------------------------------------|------------------------|
| Chen 2020                 | Corticosteroid Therapy Is Associated With Improved Outcome in Critically Ill Coronavirus Disease 2019 Patients With Hyperinflammatory Phenotype.                                                                                    | Not a randomized trial |
| Ball 2021                 | Nebulised heparin for patients on ventilation: implications for COVID-19 pneumonia.                                                                                                                                                 | Not a randomized trial |
| Brüggemann 2021           | TChloroquine for treatment of COVID-19 results in subtherapeutic exposure and prolonged QTc intervals                                                                                                                               | Not a randomized trial |
| Dixon 2020                | The Relevance of Oxytocin & Dynorphin in COVID-19: Towards a Prophylactic Treatment (preprint)                                                                                                                                      | Not a randomized trial |
| Singh 2021                | The outcome of fluticasone nasal spray on anosmia and triamcinolone oral paste in taste dysgeusia in COVID-19 patients                                                                                                              | Not a randomized trial |
| Katia 2021                | Efficacy of canakinumab in mild or severe COVID-19 pneumonia                                                                                                                                                                        | Not a randomized trial |
| Al Shehry 2021            | Safety and Efficacy of Convalescent Plasma for Severe COVID-19: Interim Report of a Multicenter Phase II Study from Saudi Arabia                                                                                                    | Not a randomized trial |
| Janapala 2020             | Novaferon, treatment in COVID-19 patients.                                                                                                                                                                                          | Not a randomized trial |
| Poulakou 2021             | Beneficial Effects of Intermediate Dosage of Anticoagulation Treatment on the Prognosis of Hospitalized COVID-19 Patients: The ETHRA Study.                                                                                         | Not a randomized trial |
| Papamanoli 2020           | 76. Effect of Early Administration of Systemic Corticosteroids on Outcomes in Patients with COVID-19 Pneumonia                                                                                                                      | Not a randomized trial |
| Kollias 2020              | Anticoagulation therapy in COVID-19: Is there a dose-dependent benefit?                                                                                                                                                             | Not a randomized trial |
| Namazi 2020               | Ellagic acid can possibly be an adjuvant treatment for COVID-19                                                                                                                                                                     | Not a randomized trial |
| Gautret 2021              | Safety profile of hydroxychloroquine and azithromycin combined treatment in COVID-19 patients                                                                                                                                       | Not a randomized trial |
| Reig 2020                 | 560. Repurposing Eravacycline for the Treatment of SARS-CoV-2 Infections                                                                                                                                                            | Not a randomized trial |
| Feng 2020                 | Differentiation between COVID-19 and bacterial pneumonia using radiomics of chest computed tomography and clinical features                                                                                                         | Not a randomized trial |
| Mugheddu 2020             | Safety of secukinumab treatment in COVID-19 affected psoriatic patients.                                                                                                                                                            | Not a randomized trial |
| Carbillon 2021            | Hydroxychloroquine at usual doses as an option for coronavirus disease 2019 treatment.                                                                                                                                              | Not a randomized trial |
| Flisiak 2020              | Remdesivir-based therapy improved recovery of patients with COVID-19 in the SARSTer multicentre, real-world study.                                                                                                                  | Not a randomized trial |
| Al-Sadawi 2020            | Hydroxychloroquine and Azithromycin Usage in African American Patients With Coronavirus Disease 2019 (COVID-19) and Their Effects on QT Interval                                                                                    | Not a randomized trial |
| Panigada 2020             | Effect of heparin on viscoelastic parameters of COVID-19 critically ill patients. A Viscoelastic Coagulation Monitor (VCM) analysis                                                                                                 | Not a randomized trial |
| Moniuszko-Malinowska 2021 | Convalescent Plasma Transfusion for the Treatment of COVID-19, Experience from Poland: A Multicenter Study                                                                                                                          | Not a randomized trial |
| Chen 2020                 | Clinical efficacy and safety of favipiravir in the treatment of COVID-19 patients                                                                                                                                                   | Not a randomized trial |
| Alamdari 2020             | Application of methylene blue -vitamin C - N-acetyl cysteine for treatment of critically ill COVID-19 patients, report of a phase-I clinical trial. (Special Issue: Therapeutic targets and pharmacological treatment of COVID-19.) | Not a randomized trial |
| Piralla 2020              | Residual SARS-CoV-2 RNA in nasal swabs of convalescent COVID-19 patients: Is prolonged quarantine always justified?                                                                                                                 | Not a randomized trial |
| Potere 2020               | Low-dose subcutaneous tocilizumab to prevent disease progression in patients with moderate COVID-19 pneumonia and hyperinflammation. (Special Issue: Coronavirus (COVID-19) collection.)                                            | Not a randomized trial |
| Bautin 2020               | Inhalation surfactant therapy in the integrated treatment of severe COVID-19 pneumonia                                                                                                                                              | Not a randomized trial |
| Hong 2020                 | Celebrex Adjuvant Therapy on Coronavirus Disease 2019: An Experimental Study                                                                                                                                                        | Not a randomized trial |
| Zhou 2020                 | Low-dose corticosteroid combined with immunoglobulin reverses deterioration in severe cases with COVID-19.                                                                                                                          | Not a randomized trial |
| Erdem 2020                | Treatment of SARS-cov-2 pneumonia with favipiravir: Early results from the Ege University cohort, Turkey.                                                                                                                           | Not a randomized trial |

|                         |                                                                                                                                                                                    |                        |
|-------------------------|------------------------------------------------------------------------------------------------------------------------------------------------------------------------------------|------------------------|
| Strohbehn 2020          | COVIDOSE: A phase 2 clinical trial of low-dose tocilizumab in the treatment of non-critical COVID-19 pneumonia.                                                                    | Not a randomized trial |
| Dhibar 2020             | Post-exposure prophylaxis with hydroxychloroquine for the prevention of COVID-19, a myth or a reality? The PEP-CQ Study.                                                           | Not a randomized trial |
| Spoorthi 2020           | Utility of Ivermectin and Doxycycline combination for the treatment of SARS-CoV-2                                                                                                  | Not a randomized trial |
| Masiv° 2020             | Lack of detrimental effect of corticosteroids on antibody responses to SARS-CoV-2 and viral clearance in patients hospitalized with COVID-19                                       | Not a randomized trial |
| Wu 2020                 | Phase 1 trial for treatment of COVID-19 patients with pulmonary fibrosis using hESC-IMRCs                                                                                          | Not a randomized trial |
| Garcia-Fernandez 2020   | Usefulness and safety of self-electrocardiographic monitoring during treatment with hydroxychloroquine and azithromycin in COVID-19 patients                                       | Not a randomized trial |
| Chang 2020              | Safety and Efficacy of Bronchoscopy in Critically Ill Patients with Coronavirus Disease 2019                                                                                       | Not a randomized trial |
| Petrak 2020             | Early Tocilizumab Dosing is Associated with Improved Survival In Critically Ill Patients Infected With Sars-CoV-2                                                                  | Not a randomized trial |
| Hashim 2020             | Controlled randomized clinical trial on using Ivermectin with Doxycycline for treating COVID-19 patients in Baghdad, Iraq                                                          | Not a randomized trial |
| BelenguerMuncharaz 2020 | Effectiveness of non-invasive ventilation in intensive care unit admitted patients due to SARS-CoV-2 pneumonia                                                                     | Not a randomized trial |
| Lanthier 2020           | [In patients hospitalized for COVID-19, does dexamethasone reduce 28-days mortality compared to standard treatment?]                                                               | Not a randomized trial |
| Kintscher 2020          | Plasma Angiotensin Peptide Profiling and ACE (Angiotensin-Converting Enzyme)-2 Activity in COVID-19 Patients Treated With Pharmacological Blockers of the Renin-Angiotensin System | Not a randomized trial |
| Yang 2020               | Clinical Characteristics and Outcomes of COVID-19 Patients Receiving Compassionate Use Leronlimab                                                                                  | Not a randomized trial |
| Singh 2020              | In adults exposed to COVID-19, hydroxychloroquine did not reduce confirmed or probable COVID-19;trial stopped for futility                                                         | Not a randomized trial |
| Villa 2020              | Blood purification therapy with a hemodiafilter featuring enhanced adsorptive properties for cytokine removal in patients presenting COVID-19: a pilot study                       | Not a randomized trial |
| Khan 2020               | Ivermectin treatment may improve the prognosis of patients with COVID-19                                                                                                           | Not a randomized trial |
| Gergi 2020              | Thrombo-inflammation response to Tocilizumab in COVID-19                                                                                                                           | Not a randomized trial |
| Ayerdi 2020             | Preventive efficacy of tenofovir/emtricitabine against SARS-CoV-2 among PREP users                                                                                                 | Not a randomized trial |
| Guan 2020               | Erratum to hydrogen/oxygen mixed gas inhalation improves disease severity and dyspnea in patients with Coronavirus disease 2019 in a recent multicenter, open-label clinical trial | Not a randomized trial |
| Li 2020                 | Regarding ,ÄúRuxolitinib in treatment of severe coronavirus disease 2019 (COVID-19): A-†multicenter, single-blind, randomized controlled trial,Äù                                  | Not a randomized trial |
| Rasmussen 2020          | Pulmonary administration of remdesivir in the treatment of COVID-19                                                                                                                | Not a randomized trial |
| Hacibekiro_lu 2020      | Efficacy of convalescent plasma according to blood groups in COVID-19 patients                                                                                                     | Not a randomized trial |
| López Zúñiga 2020       | High-Dose Corticosteroid Pulse Therapy-†Increases the Survival Rate in COVID-19 Patients at Risk of Cytokine Storm (preprint)                                                      | Not a randomized trial |
| Zhdanov 2020            | Clinical efficacy and safety of nebulized prostacyclin in patients with sARs-CoV-2 (prospective comparative study). [Russian]                                                      | Not a randomized trial |
| Sinha 2020              | Interleukin-6 Receptor Inhibitor Therapy Is Associated with Improved Outcomes in Patients with Severe COVID-19 Disease (preprint)                                                  | Not a randomized trial |
| Eslami 2020             | The impact of sofosbuvir/daclatasvir or ribavirin in patients with severe COVID-19                                                                                                 | Not a randomized trial |
| Qamar 2020              | Protective Effects of CVD and DM Medications in SARS-CoV-2 Infection                                                                                                               | Not a randomized trial |
| Hong 2020               | Early Hydroxychloroquine Administration for Rapid Severe Acute Respiratory Syndrome Coronavirus 2 Eradication                                                                      | Not a randomized trial |

|                        |                                                                                                                                                                                   |                        |
|------------------------|-----------------------------------------------------------------------------------------------------------------------------------------------------------------------------------|------------------------|
| kamran 2020            | Clearing the fog: Is HCQ effective in reducing COVID-19 progression: A randomized controlled trial (preprint)                                                                     | Not a randomized trial |
| Xiong 2020             | Efficacy of herbal medicine (Xuanfei Baidu decoction) combined with conventional drug in treating COVID-19:A pilot randomized clinical trial                                      | Not a randomized trial |
| Pang 2020              | Efficacy and tolerability of bevacizumab in patients with severe Covid -19                                                                                                        | Not a randomized trial |
| Xue Ping 2020          | Observation on the application of small and medium-dose glucocorticoids in the treatment of elderly patients with common new type coronavirus pneumonia                           | Not a randomized trial |
| Li Xingang 2020        | Clinical study of glucocorticoids in the treatment of severe patients with new coronavirus pneumonia                                                                              | Not a randomized trial |
| Awasthi 2021           | Plasma IL-6 levels following corticosteroid therapy as an indicator of ICU length of stay in critically ill COVID-19 patients                                                     | Not a randomized trial |
| Cantarelli 2021        | SPSQ-178,ÄHepatotoxicity associated with acute tocilizumab treatment in patients with SARS-CoV-2 infection                                                                        | Not a randomized trial |
| Cabanov 2020           | Treatment with tocilizumab does not inhibit induction of anti-COVID-19 antibodies in patients with severe SARS-CoV-2 infection                                                    | Not a randomized trial |
| Abolghasemi 2020       | Clinical efficacy of convalescent plasma for treatment of COVID-19 infections: Results of a multicenter clinical study                                                            | Not a randomized trial |
| Govind 2020            | Clozapine Treatment and Risk of COVID-19                                                                                                                                          | Not a randomized trial |
| Gokhale 2020           | Tocilizumab improves survival in patients with persistent hypoxia in severe COVID-19 pneumonia                                                                                    | Not a randomized trial |
| Guan 2020              | Hydrogen/oxygen mixed gas inhalation improves disease severity and dyspnea in patients with Coronavirus disease 2019 in a recent multicenter, open-label clinical trial           | Not a randomized trial |
| Bao 2020               | Successful treatment of patients severely ill with COVID-19                                                                                                                       | Not a randomized trial |
| Chen 2020              | Antiviral Activity and Safety of Darunavir/Cobicistat for Treatment of COVID-19                                                                                                   | Not a randomized trial |
| Wu 2020                | Identification and validation of a novel clinical signature to predict the prognosis in confirmed COVID-19 patients                                                               | Not a randomized trial |
| Salazar 2020           | Treatment of Coronavirus Disease 2019 (COVID-19) Patients with Convalescent Plasma                                                                                                | Not a randomized trial |
| CallejasRubio 2020     | Eficacia de los pulsos de corticoides en pacientes con sv#ndrome de liberaci#n de citocinas inducido por infecci#n por SARS-CoV-2                                                 | Not a randomized trial |
| Zhang 2020             | A comparative study on the time to achieve negative nucleic acid testing and hospital stays between Danoprevir and Lopinavir/Ritonavir in the treatment of patients with COVID-19 | Not a randomized trial |
| LuisCallejasRubio 2020 | De Los Pulsos De Corticoides En Pacientes Con Sv#ndrome De Liberaci#n De Citoquinas Inducido Por Infecci#n Por Sars-Cov-2                                                         | Not a randomized trial |
| Feily 2020             | COVID-19: Pentoxifylline as a potential adjuvant treatment                                                                                                                        | Not a randomized trial |
| Hong 2020              | Celebrex adjuvant therapy on COVID-19: An experimental study                                                                                                                      | Not a randomized trial |
| Havlichek 2020         | A Trial of Lopinavir-Ritonavir in Covid-19                                                                                                                                        | Not a randomized trial |
| Toniati 2020           | Tocilizumab for the treatment of severe COVID-19 pneumonia with hyperinflammatory syndrome and acute respiratory failure: A single center study of 100 patients in Brescia, Italy | Not a randomized trial |
| Xiao Qi 2020           | Analysis of the value of traditional Chinese medicine Shufeng Jiedu Capsules combined with Arbidol in the treatment of mild new coronavirus pneumonia                             | Not a randomized trial |
| Ankrum 2020            | Can cell therapies halt cytokine storm in severe COVID-19 patients?                                                                                                               | Not a randomized trial |
| Diurno 2020            | Eculizumab treatment in patients with COVID-19: preliminary results from real life ASL Napoli 2 Nord experience                                                                   | Not a randomized trial |
| Karahmet 2020          | Potential effect of natural and anabolizan steroids in elderly patient with COVID-19                                                                                              | Not a randomized trial |
| LabibSalem 2020        | The possible beneficial adjuvant effect of Influenza vaccine to minimize the severity of COVID-19                                                                                 | Not a randomized trial |
| Cantini 2020           | Baricitinib therapy in COVID-19: A pilot study on safety and clinical impact                                                                                                      | Not a randomized trial |



|                      |                                                                                                                                                                                                             |                        |
|----------------------|-------------------------------------------------------------------------------------------------------------------------------------------------------------------------------------------------------------|------------------------|
| Liu 2020             | Respiratory rehabilitation in elderly patients with COVID-19: A randomized controlled study                                                                                                                 | Not a randomized trial |
| Zhu 2020             | Arbidol Monotherapy is Superior to Lopinavir/ritonavir in Treating COVID-19                                                                                                                                 | Not a randomized trial |
| Zhou 2020            | Interferon- $\alpha$ 2b treatment for COVID-19                                                                                                                                                              | Not a randomized trial |
| Zha 2020             | Corticosteroid treatment of patients with coronavirus disease 2019 (COVID-19)                                                                                                                               | Not a randomized trial |
| Ye 2020              | Clinical efficacy of lopinavir/ritonavir in the treatment of Coronavirus disease 2019                                                                                                                       | Not a randomized trial |
| Xie 2020             | Effect of regular intravenous immunoglobulin therapy on prognosis of severe pneumonia in patients with COVID-19                                                                                             | Not a randomized trial |
| Meng 2020            | An experimental trial of recombinant human interferon alpha nasal drops to prevent coronavirus disease 2019 in medical staff in an epidemic area                                                            | Not a randomized trial |
| Mahevas 2020         | No evidence of clinical efficacy of hydroxychloroquine in patients hospitalized for COVID-19 infection with oxygen requirement: results of a study using routinely collected data to emulate a target trial | Not a randomized trial |
| Gautret 2020         | Hydroxychloroquine and azithromycin as a treatment of COVID-19: results of an open-label non-randomized clinical trial                                                                                      | Not a randomized trial |
| Cai 2020             | Experimental Treatment with Favipiravir for COVID-19: An Open-Label Control Study                                                                                                                           | Not a randomized trial |
| Bian 2020            | Meplazumab treats COVID-19 pneumonia: an open-labelled, concurrent controlled add-on clinical trial                                                                                                         | Not a randomized trial |
| Lenkens 2020         | [Medication and comedication in COVID-19 patients]                                                                                                                                                          | Not a randomized trial |
| Wang 2020            | Efficacy and Safety of Leflunomide for Refractory COVID-19: An Open-label Controlled Study                                                                                                                  | Not a randomized trial |
| Boyko 2020           | The first experience of using the drug Angiovit in the complex treatment of the acute stage of COVID-19 infection                                                                                           | Not a randomized trial |
| Myasnikov 2020       | Efficacy of Interferon Gamma in the Prevention of SARS-CoV-2 Infection (COVID-19): Results of a Prospective Controlled Trial                                                                                | Not a randomized trial |
| Selman 2020          | Results of a Chilean Nation-Wide Network of Blood Banks for Convalescent Plasma Collection for Pandemic SARS-CoV-2 Treatment                                                                                | Not a randomized trial |
| Liu 2020             | The dual role of anti-viral therapy in the treatment of Coronavirus disease 2019.                                                                                                                           | Not a randomized trial |
| Karan 2020           | Clinical outcomes in patients with COVID-19 infection during phase IV studies of cladribine tablets for treatment of multiple sclerosis                                                                     | Not a randomized trial |
| Embase 2021          | THERAPEUTIC EFFECT of VITAMIN A on COVID-19 PATIENTS and ITS PROPHYLACTIC EFFECT on CONTACTS                                                                                                                | Not a randomized trial |
| Kara 2021            | Effect of a single high dose of Vitamin D-3 on hospital length of stay in patients with moderate to severe COVID-19 A randomized clinical trial                                                             | Not a randomized trial |
| Sarmiento 2021       | Ruxolitinib for Severe COVID-19-Related Hyperinflammation in Nonresponders to Steroids                                                                                                                      | Not a randomized trial |
| Gautret 2020         | Hydroxychloroquine and Azithromycin as a treatment of COVID-19: preliminary results of an open-label non-randomized clinical trial                                                                          | Not a randomized trial |
| Casadevall 2020      | A Randomized Trial of Convalescent Plasma for COVID-19-Potentially Hopeful Signals                                                                                                                          | Not a randomized trial |
| Gautret 2021         | Clinical efficacy and safety profile of hydroxychloroquine and azithromycin against COVID-19                                                                                                                | Not a randomized trial |
| Dillon 2020          | A real-world data study of coronavirus-2019 disease severity in patients with multiple sclerosis treated with ocrelizumab                                                                                   | Not a randomized trial |
| LeBon 2021           | Efficacy and safety of oral corticosteroids and olfactory training in the management of COVID-19-related loss of smell.                                                                                     | Not a randomized trial |
| DiTano 2021          | [The AFFIRM-AHF trial: results, impact of COVID-19 and clinical implications].                                                                                                                              | Not a randomized trial |
| Jiang 2020           | A combination regimen by lopinave/litonawe, emtricitabine and tenofovir alafenamide fumarate for treatment of novel coronavirus pneumonia (TARCoV)                                                          | Not a randomized trial |
| Gonzalez-Castro 2021 | Combined therapy of tocilizumab and corticosteroids in severe SARS-CoV-2 disease.                                                                                                                           | Not a randomized trial |

|                     |                                                                                                                                                                                                                                                                       |                           |
|---------------------|-----------------------------------------------------------------------------------------------------------------------------------------------------------------------------------------------------------------------------------------------------------------------|---------------------------|
| Pandit 2021         | Effectiveness and safety of thymosin alpha-1 in patients with severe COVID-19: A prospective open-label study                                                                                                                                                         | Not a randomized trial    |
| Dal 2021            | Covid-19 Clinical Course and Blood Groups: Turkish Population-Based Study                                                                                                                                                                                             | Not a randomized trial    |
| Zolotovskaia 2021   | [Post-COVID-19 asthenic syndrome]                                                                                                                                                                                                                                     | Not a randomized trial    |
| Carr 2020           | A new clinical trial to test high-dose vitamin C in patients with COVID-19                                                                                                                                                                                            | Not a randomized trial    |
| Andrani 2020        | Effectiveness of helmet CPAP to reduce intubation and mortality rate in patients with COVID-19                                                                                                                                                                        | Not a randomized trial    |
| Aschieri 2020       | Hospital mortality and safety of therapeutic vs. prophylactic doses of low molecular weight heparin in COVID-19 patients                                                                                                                                              | Not a randomized trial    |
| Karina 2021         | Phase I/II Clinical Trial of Autologous Activated Platelet-Rich Plasma (aaPRP) in the Treatment of Severe Coronavirus Disease 2019 (COVID-19) Patients                                                                                                                | Not a randomized trial    |
| Gagneux-Brunon 2021 | Acceptability of a COVID-19 pre-exposure prophylaxis trial with hydroxychloroquine in French healthcare workers during the first wave of COVID-19 pandemic                                                                                                            | Not a randomized trial    |
| Keyhani 2021        | A telehealth-based randomized controlled trial: A model for outpatient trials of off-label medications during the COVID-19 pandemic.                                                                                                                                  | Not a randomized trial    |
| Gyselinc 2021       | Correction to: Direct antivirals working against the novel coronavirus: azithromycin (DAWN-AZITHRO), a randomized, multicenter, open-label, adaptive, proof-of-concept clinical trial of new antivirals working against SARS-CoV-2-azithromycin trial.                | Not a randomized trial    |
| Terpos 2020         | Rapid Reduction of Anti-Sars-Cov-2 Antibodies in Convalescent Plasma Donors;Results of a Phase 2 Clinical Study                                                                                                                                                       | Not a randomized trial    |
| Hu Cong 2020        | The clinical efficacy of high-dose or low-dose chloroquine diphosphate as an adjuvant treatment for hospitalized patients with novel coronavirus pneumonia                                                                                                            | Not a randomized trial    |
| NR 2020             | Ruijin Hospital Affiliated to Shanghai Jiaotong University School of Medicine released the results of a multi-center clinical study of hydroxychloroquine in the treatment of novel coronavirus pneumonia %J Journal of Shanghai Jiaotong University (Medical Edition | Not a randomized trial    |
| Wei Runan 2020      | A multi-center, prospective study of early abidol + lopinavir/ritonavir + recombinant interferon $\alpha$ -2b combined antiviral therapy in patients with novel coronavirus pneumonia in Zhejiang Province                                                            | Not a randomized trial    |
| Silveira 2021       | Efficacy of Brazilian Green Propolis (EPP-AF-Æ) as an adjunct treatment for hospitalized COVID-19 patients: a randomized, controlled clinical trial                                                                                                                   | Nutrition and supplements |
| dePaulaEduardo 2021 | Salivary SARS-CoV-2 load reduction with mouthwash use: a randomized pilot clinical trial                                                                                                                                                                              | Others                    |
| Sehgal 2021         | A randomised trial of Mycobacterium w in critically ill patients with COVID-19: ARMY-1                                                                                                                                                                                | Others                    |
| Carrouel 2021       | Use of an antiviral mouthwash as a barrier measure in the sars-cov-2 transmission in adults with asymptomatic to mild COVID-19: a multicenter, randomized, double-blind controlled trial                                                                              | Others                    |
| DiDomenico 2021     | Effectiveness of hydrogen peroxide as auxiliary treatment for COVID-19 hospitalized patients - preliminary results of a randomized double-blind clinical trial                                                                                                        | Others                    |
| Kosari 2021         | The effect of propolis plus Hyoscyamus niger L. methanolic extract on clinical symptoms in patients with acute respiratory syndrome suspected to COVID-19: A clinical trial.                                                                                          | Others                    |
| Lin 2021            | Mycobacterium vaccae Nebulization in the Treatment of COVID-19: A Randomized, Double-Blind, Placebo-Controlled Trial                                                                                                                                                  | Others                    |
| HannaHuang 2021     | Use of Chlorhexidine to Eradicate Oropharyngeal SARS-CoV-2 in COVID-19 Patients.                                                                                                                                                                                      | Others                    |
| Guenezan 2021       | Povidone Iodine Mouthwash, Gargle, and Nasal Spray to Reduce Nasopharyngeal Viral Load in Patients With COVID-19: A Randomized Clinical Trial.                                                                                                                        | Others                    |
| Gold 2020           | Efficacy of m-Health for the detection of adverse events following immunization - The stimulated telephone assisted rapid safety surveillance (STARSS) randomised control trial                                                                                       | Others                    |
| Seneviratne 2020    | Efficacy of commercial mouth-rinses on SARS-CoV-2 viral load in saliva: Randomized Control Trial in Singapore (preprint)                                                                                                                                              | Others                    |

|                      |                                                                                                                                                                                                                                                          |                               |
|----------------------|----------------------------------------------------------------------------------------------------------------------------------------------------------------------------------------------------------------------------------------------------------|-------------------------------|
| Mohamed 2020         | EARLY VIRAL CLEARANCE AMONG COVID-19 PATIENTS WHEN GARGLING WITH PIVIDONE-IODINE AND ESSENTIAL OILS: A PILOT CLINICAL TRIAL (preprint)                                                                                                                   | Others                        |
| Tan Shigang 2020     | Effect of Intravenous Lidocaine on Central Venous Puncture Analgesia in Cases of Suspected or Confirmed COVID-19                                                                                                                                         | Others                        |
| Bretthauer 2020      | Randomized Re-Opening of Training Facilities during the COVID-19 pandemic                                                                                                                                                                                | Others                        |
| Mohammadzadeh 2020   | Effectiveness of electronic health care and drug monitoring program to prevent COVID-19 and adherence to therapeutic regimen in patients with ischemic heart disease - A pilot study                                                                     | Others                        |
| Wang Yali 2020       | Preliminary clinical efficacy analysis of traditional Chinese medicine taken orally plus fumigation combined with super-high dose vitamin C in the treatment of new coronavirus pneumonia                                                                | Others                        |
| Kjellberg 2021       | Randomised, controlled, open label, multicentre clinical trial to explore safety and efficacy of hyperbaric oxygen for preventing ICU admission, morbidity and mortality in adult patients with COVID-19                                                 | Oxygen delivery               |
| Sozio 2021           | CORonavirus-19 mild to moderate pneumonia Management with blood Ozonization in patients with Respiratory failure (CORMOR) multicentric prospective randomized clinical trial                                                                             | Oxygen delivery               |
| Adly 2021            | Telemanagement of Home-Isolated COVID-19 Patients Using Oxygen Therapy With Noninvasive Positive Pressure Ventilation and Physical Therapy Techniques: Randomized Clinical Trial.                                                                        | Oxygen delivery               |
| Sahin 2021           | Effectiveness of ozone therapy in addition to conventional treatment on mortality in patients with COVID-19.                                                                                                                                             | Oxygen delivery               |
| Kharat 2021          | Self-proning in covid-19 patients on low-flow Oxygen therapy. A cluster randomised Controlled trial                                                                                                                                                      | Oxygen delivery               |
| Grieco 2021          | Effect of Helmet Noninvasive Ventilation vs High-Flow Nasal Oxygen on Days Free of Respiratory Support in Patients With COVID-19 and Moderate to Severe Hypoxemic Respiratory Failure: The HENIVOT Randomized Clinical Trial.                            | Oxygen delivery               |
| Kharat 2021          | Self-proning in COVID-19 patients on low-flow oxygen therapy: a cluster randomised controlled trial                                                                                                                                                      | Oxygen delivery               |
| ProQuestCentral 2021 | Self-proning in COVID-19 patients on low-flow oxygen therapy. A cluster randomised controlled trial                                                                                                                                                      | Oxygen delivery               |
| Shah 2020            | Safety and efficacy of ozone therapy in mild to moderate COVID-19 patients: A Phase 1/11 Randomized control Trial (SEOT study)                                                                                                                           | Oxygen delivery               |
| Shogenova 2020       | Effect of thermal helium-oxygen mixture on viral load in COVID-19                                                                                                                                                                                        | Oxygen delivery               |
| Araimo 2020          | Ozone as Adjuvant Support in the Treatment of COVID-19: A Preliminary Report of Probiozoid Trial                                                                                                                                                         | Oxygen delivery               |
| Li Min 2020          | Observation of the application effect of high-flow humidification oxygen therapy through the nose in the treatment of new coronavirus pneumonia complicated with acute respiratory failure                                                               | Oxygen delivery               |
| Summer Games 2020    | Comparison of the clinical effects of conventional nasal catheter oxygen inhalation and high-flow oxygen inhalation in the treatment of new coronavirus pneumonia                                                                                        | Oxygen delivery               |
| Kienbacher 2021      | The use of personal protection equipment does not impair the quality of cardiopulmonary resuscitation: A prospective triple-cross over randomised controlled non-inferiority trial                                                                       | Personal protective equipment |
| Felinska 2021        | Surgical Performance Is Not Negatively Impacted by Wearing a Commercial Full-Face Mask with Ad Hoc 3D-Printed Filter Connection as a Substitute for Personal Protective Equipment during the COVID-19 Pandemic: A Randomized Controlled Cross-Over Trial | Personal protective equipment |
| Bundgaard 2020       | Effectiveness of Adding a Mask Recommendation to Other Public Health Measures to Prevent SARS-CoV-2 Infection in Danish Mask Wearers : A Randomized Controlled Trial.                                                                                    | Personal protective equipment |
| NoorAzhar 2020       | COVID-19 aerosol box as protection from droplet and aerosol contaminations in healthcare workers performing airway intubation: a randomised cross-over simulation study                                                                                  | Personal protective equipment |
| Shaw 2020            | Wearing of Cloth or Disposable Surgical Face Masks has no Effect on Vigorous Exercise Performance in Healthy Individuals                                                                                                                                 | Personal protective equipment |
| Fong 2020            | Impact of aerosol box on intubation during COVID-19: a simulation study of normal and difficult airways                                                                                                                                                  | Personal protective equipment |

|                       |                                                                                                                                                                                                                                                                 |                                                        |
|-----------------------|-----------------------------------------------------------------------------------------------------------------------------------------------------------------------------------------------------------------------------------------------------------------|--------------------------------------------------------|
| Madabhushi 2020       | Time to adapt in the pandemic era: a prospective randomized non-inferiority study comparing time to intubate with and without the barrier box                                                                                                                   | Personal protective equipment                          |
| Hua 2020              | Short-term skin reactions following use of N95 respirators and medical masks                                                                                                                                                                                    | Personal protective equipment                          |
| Pompeii 2020          | Training and Fit Testing of Health Care Personnel for Reusable Elastomeric Half-Mask Respirators Compared With Disposable N95 Respirators                                                                                                                       | Personal protective equipment                          |
| Li 2020               | The Effect of Cognitive Behavioral Therapy on Depression, Anxiety, and Stress in Patients With COVID-19: A Randomized Controlled Trial                                                                                                                          | Psychological and educational                          |
| Younie 2020           | Improving young children's handwashing behaviour and understanding of germs: The impact of A Germ's Journey educational resources in schools and public spaces.                                                                                                 | Psychological and educational                          |
| Zhu Xiaoqing 2020     | Study on the application value of psychological nursing in pregnant women suspected of new coronavirus pneumonia                                                                                                                                                | Psychological and educational                          |
| Suppan 2020           | Effect of an E-Learning Module on Personal Protective Equipment Proficiency by Prehospital Personnel: Web-Based, Randomized Controlled Trial                                                                                                                    | Psychological and educational                          |
| Li 2020               | COVID-19: Repeatedly Video-Watching vs Combined Video-Watching and Live Demonstration as Training to Healthcare Providers for Donning and Doffing Personal Protective Equipment                                                                                 | Psychological and educational                          |
| Mertes 2021           | Liposomal encapsulation of trans-crocetin enhances oxygenation in patients with COVID-19-related ARDS receiving mechanical ventilation                                                                                                                          | Randomized trial with no results (e.g. trial registry) |
| Polineni 2021         | A phase IIA, double-blinded, randomized placebo-controlled trial of mapkapk2 inhibition by ati-450 in treatment of moderate-severe covid-19 pneumonia                                                                                                           | Randomized trial with no results (e.g. trial registry) |
| Wolak 2021            | Inhaled nitric oxide for the treatment of COVID-19 and other viral pneumonias in adults                                                                                                                                                                         | Randomized trial with no results (e.g. trial registry) |
| Bosaeed 2021          | Multicentre randomised double-blinded placebo-controlled trial of favipiravir in adults with mild COVID-19.                                                                                                                                                     | Randomized trial with no results (e.g. trial registry) |
| Lopes 2021            | Randomized Clinical Trial to Evaluate a Routine Full Anticoagulation Strategy in Patients with Coronavirus Infection (SARS-CoV2) Admitted to Hospital: Rationale and Design of the ACTION (AntiCoagulation cORonavirus), A Coalition IV Trial                   | Randomized trial with no results (e.g. trial registry) |
| McEneny-King 2021     | Pharmacokinetic and Pharmacodynamic Evaluation of Ravulizumab in Adults with Severe Coronavirus Disease 2019.                                                                                                                                                   | Randomized trial with no results (e.g. trial registry) |
| Goldin 2021           | Treatment-dose LMWH versus prophylactic/intermediate dose heparins in high risk COVID-19 inpatients: Rationale and design of the HEP-COVID Trial.                                                                                                               | Randomized trial with no results (e.g. trial registry) |
| Chambers 2020         | COVID-19-Associated Coagulopathy: Safety and Efficacy of Prophylactic Anticoagulation Therapy in Hospitalized Adults with COVID-19                                                                                                                              | Randomized trial with no results (e.g. trial registry) |
| Dummer 2020           | Clinical Trial to Evaluate an Approved ITP Therapy Targeting Spleen Tyrosine Kinase (SYK) for Prevention and Treatment of COVID-19 Related Complications                                                                                                        | Randomized trial with no results (e.g. trial registry) |
| Srivastava 2021       | A double blinded placebo controlled comparative clinical trial to evaluate the effectiveness of Siddha medicines, Kaba Sura Kudineer (KSK) & Nilavembu Kudineer (NVK) along with standard Allopathy treatment in the management of symptomatic COVID 19 pat     | Randomized trial with no results (e.g. trial registry) |
| Vanassche 2020        | A randomized, open-label, adaptive, proof-of-concept clinical trial of modulation of host thromboinflammatory response in patients with COVID-19: the DAWN-Antico study (vol 21, 1005, 2020)                                                                    | Randomized trial with no results (e.g. trial registry) |
| Devos 2020            | Correction to: A randomized, multicentre, open-label phase II proof-of-concept trial investigating the clinical efficacy and safety of the addition of convalescent plasma to the standard of care in patients hospitalized with COVID-19: the Donated Antibodi | Randomized trial with no results (e.g. trial registry) |
| Sivapalan 2020        | Proactive prophylaxis with azithromycin and hydroxychloroquine in hospitalized patients with COVID-19 (ProPAC-COVID): a statistical analysis plan                                                                                                               | Randomized trial with no results (e.g. trial registry) |
| Fragoso-Saavedra 2020 | A parallel-group, multicenter randomized, double-blinded, placebo-controlled, phase 2/3, clinical trial to test the efficacy of pyridostigmine bromide at low doses to reduce mortality or invasive mechanical ventilation in adults with severe SARS-CoV-2 inf | Randomized trial with no results (e.g. trial registry) |
| Li 2020               | Convalescent Plasma Treatment in Severe and Life-Threatening COVID-19: A Randomized Controlled Clinical Trial                                                                                                                                                   | Randomized trial with no results (e.g. trial registry) |

|                     |                                                                                                                                                                                                                                                                  |                                                        |
|---------------------|------------------------------------------------------------------------------------------------------------------------------------------------------------------------------------------------------------------------------------------------------------------|--------------------------------------------------------|
| Takayama 2020       | A multi-center, randomized controlled trial by the Integrative Management in Japan for Epidemic Disease (IMJEDI study-RCT) on the use of Kampo medicine, kakkonto with shosaiokotokakikyosekko, in mild-to-moderate COVID-19 patients for symptomatic relief and | Randomized trial with no results (e.g. trial registry) |
| Center 2020         | Pilot Randomized Controlled Trial: Fluoxetine to Reduce Hospitalization From COVID-19 Infection (FloR COVID-19)                                                                                                                                                  | Randomized trial with no results (e.g. trial registry) |
| Sheng 2020          | Canakinumab to reduce deterioration of cardiac and respiratory function in SARS-CoV-2 associated myocardial injury with heightened inflammation (canakinumab in Covid-19 cardiac injury: The three C study)                                                      | Randomized trial with no results (e.g. trial registry) |
| Han 2020            | RUXCOVID: A phase 3, randomized, placebo-controlled study evaluating the efficacy and safety of ruxolitinib in patients with COVID-19-associated cytokine storm                                                                                                  | Randomized trial with no results (e.g. trial registry) |
| Strohbehn 2020      | COVIDOSE: Low-dose tocilizumab in the treatment of COVID-19 pneumonitis                                                                                                                                                                                          | Randomized trial with no results (e.g. trial registry) |
| Liu 2020            | Efficacy of chloroquine versus lopinavir/ritonavir in mild/general COVID-19 infection: a prospective, open-label, multicenter, randomized controlled clinical study                                                                                              | Randomized trial with no results (e.g. trial registry) |
| Feeney 2020         | The COVIRL-001 Trial: A multicentre, prospective, randomised trial comparing standard of care (SOC) alone, SOC plus hydroxychloroquine monotherapy or SOC plus a combination of hydroxychloroquine and azithromycin in the treatment of non-critical, SARS-CoV   | Randomized trial with no results (e.g. trial registry) |
| Plaze 2020          | [Repurposing chlorpromazine to treat COVID-19: the reCoVery study]                                                                                                                                                                                               | Randomized trial with no results (e.g. trial registry) |
| Plaze 2020          | Repurposing of chlorpromazine in COVID-19 treatment: the reCoVery study                                                                                                                                                                                          | Randomized trial with no results (e.g. trial registry) |
| Biosciences 2020    | Efficacy and Safety Study of Allogeneic HB-adMSCs for the Treatment of COVID-19                                                                                                                                                                                  | Randomized trial with no results (e.g. trial registry) |
| Center 2020         | COVID-19 Patient Positioning Pragmatic Trial                                                                                                                                                                                                                     | Randomized trial with no results (e.g. trial registry) |
| Center 2020         | Hyperbaric Oxygen Therapy Effect in COVID-19 RCT (HBOTCOVID19)                                                                                                                                                                                                   | Randomized trial with no results (e.g. trial registry) |
| Colombia 2020       | Effectiveness and Safety of Medical Treatment for SARS-CoV-2 (COVID-19) in Colombia                                                                                                                                                                              | Randomized trial with no results (e.g. trial registry) |
| Center 2020         | Plasma Collection From Convalescent and/or Immunized Donors for the Treatment of COVID-19                                                                                                                                                                        | Randomized trial with no results (e.g. trial registry) |
| Branch-Elliman 2020 | Sarilumab for Patients With Moderate COVID-19 Disease: A Randomized Controlled Trial With a Play-The-Winner Design                                                                                                                                               | Randomized trial with no results (e.g. trial registry) |
| Castello 2020       | Pilot Study on Cytokine Filtration in COVID-19 ARDS                                                                                                                                                                                                              | Randomized trial with no results (e.g. trial registry) |
| Center 2020         | Ruxolitinib for Treatment of Covid-19 Induced Lung Injury ARDS                                                                                                                                                                                                   | Randomized trial with no results (e.g. trial registry) |
| Zeng 2020           | Comparative effectiveness and safety of ribavirin plus interferon-alpha, lopinavir/ritonavir plus interferon-alpha and ribavirin plus lopinavir/ritonavir plus interferon-alpha in patients with mild to moderate novel coronavirus pneumonia                    | Randomized trial with no results (e.g. trial registry) |
| Azhar 2020          | Hydroxychloroquine, Oseltamivir and Azithromycin for the Treatment of COVID-19 Infection: An RCT                                                                                                                                                                 | Randomized trial with no results (e.g. trial registry) |
| Alabama 2020        | Trial of Hydroxychloroquine In Covid-19 Kinetics                                                                                                                                                                                                                 | Randomized trial with no results (e.g. trial registry) |
| Marshall 2020       | A phase II trial to promote recovery from COVID-19 with endocrine therapy                                                                                                                                                                                        | Randomized trial with no results (e.g. trial registry) |
| Liu Huijun 2020     | Clinical effect of dulaglutide injection in the treatment of new type of coronavirus pneumonia with type 2 diabetes                                                                                                                                              | Randomized trial with no results (e.g. trial registry) |
| Bosaeed 2021        | Favipiravir and Hydroxychloroquine Combination Therapy in Patients with Moderate to Severe COVID-19 (FACCT): An Open-Label, Multicentre, Randomised, Controlled Trial (preprint)                                                                                 | Removed from preprint server                           |

|                        |                                                                                                                                                                                                                                         |                                             |
|------------------------|-----------------------------------------------------------------------------------------------------------------------------------------------------------------------------------------------------------------------------------------|---------------------------------------------|
| Ibrahim 2020           | Factors Associated with Good Patient Outcomes Following Convalescent Plasma in COVID-19: A Prospective Phase 2 Clinical Trial (preprint)                                                                                                | Removed from preprint server                |
| Liu 2021               | Combination of Hua Shi Bai Du Granule (Q-14) and Standard Care in the Treatment of Patients with Coronavirus Disease 2019 (COVID-19): A Single-center, Open-label, Randomized Controlled Trial                                          | Traditional Chinese or alternative medicine |
| Al-Haidari 2021        | Clinical trial of black seeds against covid ,Ài 19 in Kirkuk city/ Iraq                                                                                                                                                                 | Traditional Chinese or alternative medicine |
| Nursilawatisyamsi 2021 | The effectiveness of poly-herbal adjuvants for the standard treatment of COVID 19 in patients with moderate degree                                                                                                                      | Traditional Chinese or alternative medicine |
| ArvindChopra 2021      | Coadministration of AYUSH 64 as an adjunct to Standard of Care in mild and moderate COVID-19: A randomised, controlled, multicentric clinical trial                                                                                     | Traditional Chinese or alternative medicine |
| Feng 2021              | Traditional Chinese Medicine Shenhuang Granule in Patients with Severe/Critical COVID-19: A Randomized Controlled Multicenter Trial                                                                                                     | Traditional Chinese or alternative medicine |
| Babamahmoodi 2021      | Effect of a herbal medicine containing <i>Satureja hortensis</i> L., <i>Hypericum perforatum</i> L. and <i>foeniculum vulgare</i> L. on patients with COVID-19 infection                                                                | Traditional Chinese or alternative medicine |
| Sanger 2021            | A randomized controlled clinical trial to evaluate the potential of ayurvedic medicines in patients with mild symptoms of COVID-19                                                                                                      | Traditional Chinese or alternative medicine |
| Ni 2021                | Effects of Shuanghuanglian oral liquids on patients with COVID-19: a randomized, open-label, parallel-controlled, multicenter clinical trial                                                                                            | Traditional Chinese or alternative medicine |
| Xu 2021                | Efficacy and safety of Reduning injection in the treatment of COVID-19: a randomized, multicenter clinical study.                                                                                                                       | Traditional Chinese or alternative medicine |
| Mesri 2021             | The effects of combination of &lt;i>Zingiber officinale&/i> and <i>Echinacea</i> on alleviation of clinical symptoms and hospitalization rate of suspected COVID-19 outpatients: a randomized controlled trial.                         | Traditional Chinese or alternative medicine |
| Dutt 2021              | A randomized and comparative study to assess safety and efficacy of supplemental treatment of a herbal formulation - Aayudh Advance comprising essential oils in patients with corona virus 2019 (COVID-19)                             | Traditional Chinese or alternative medicine |
| Rais 2021              | A Randomized open label parallel group pilot study to evaluate efficacy of Ayurveda interventions in the management of Asymptomatic and Mild COVID-19 patients- Experiences of a Lucknow based Level 2 hospital of Uttar Pradesh, India | Traditional Chinese or alternative medicine |
| Devpura 2021           | Randomized Placebo-Controlled Pilot Clinical Trial on the Efficacy of Ayurvedic Treatment Regime on COVID-19 Positive Patients                                                                                                          | Traditional Chinese or alternative medicine |
| Luo 2021               | The preventive effect of Xuebijing injection against Cytokine Storm for severe patients with COVID-19: a prospective randomized controlled trial                                                                                        | Traditional Chinese or alternative medicine |
| Chitra 2021            | An Open Clinical Evaluation Of Selected Siddha Regimen In Expediting The Management Of Covid-19 ,ÀiA Randomized Controlled Study                                                                                                        | Traditional Chinese or alternative medicine |
| JiaLiu 2021            | Chinese medicine (Q-14) in the Treatment of Patients with Coronavirus Disease 2019 (COVID-19): A Single-center, Open label, Randomised Controlled Trial                                                                                 | Traditional Chinese or alternative medicine |
| Raj 2020               | Effect of a novel ayurvedic preparation, Raj Nirvan Bati (rnb), on symptomatic patients of covid-19                                                                                                                                     | Traditional Chinese or alternative medicine |
| Liu 2020               | [Effect of moxibustion on clinical symptoms, peripheral inflammatory indexes and T lymphocyte subsets in COVID-19 patients]                                                                                                             | Traditional Chinese or alternative medicine |
| Sardari 2021           | Therapeutic effect of thyme ( <i>Thymus vulgaris</i> ) essential oil on patients with covid19: A randomized clinical trial                                                                                                              | Traditional Chinese or alternative medicine |
| Rao 2020               | AYUSH medicine as add-on therapy for mild category COVID-19; an open label randomised, controlled clinical trial.                                                                                                                       | Traditional Chinese or alternative medicine |
| Yan 2020               | Effects and Safety of Herbal Medicines among Community-dwelling Residents during COVID-19 Pandemic: A Large Prospective, Randomized Controlled Trial (RCT)                                                                              | Traditional Chinese or alternative medicine |
| Wanjarkhedkar 2020     | A prospective clinical study of an Ayurveda regimen in COVID 19 patients                                                                                                                                                                | Traditional Chinese or alternative medicine |
| Ai 2020                | Therapeutic effect of integrated traditional Chinese and western medicine on COVID-19 in Guangzhou                                                                                                                                      | Traditional Chinese or alternative medicine |
| Zhou 2020              | Clinical study on the treatment of patients with novel coronavirus pneumonia and asymptomatic infection with integrated traditional Chinese and western medicine                                                                        | Traditional Chinese or alternative medicine |

|                    |                                                                                                                                                                                                                                                                 |                                             |
|--------------------|-----------------------------------------------------------------------------------------------------------------------------------------------------------------------------------------------------------------------------------------------------------------|---------------------------------------------|
| Chen 2020          | The efficacy and safety of traditional Chinese medicines, modified Radix Fici Simplicissimae, combined with Western medicines amongst patients infected with the 2019 novel coronavirus (SARS-CoV-2) in tropical tourist area, China                            | Traditional Chinese or alternative medicine |
| Xiao 2020          | Efficacy of Huoxiang Zhengqi dropping pills and Lianhua Qingwen granules in treatment of COVID-19: A randomized controlled trial                                                                                                                                | Traditional Chinese or alternative medicine |
| Yan 2020           | Large-scale prospective clinical study on prophylactic intervention of COVID-19 in community population using Huoxiang Zhengqi Oral Liquid and Jinhao Jiere Granules. [Chinese]                                                                                 | Traditional Chinese or alternative medicine |
| Ai Xiangying 2020  | Effect of Integrated Traditional Chinese and Western Medicine on T Lymphocyte Subsets of Patients with Normal Type of COVID-19                                                                                                                                  | Traditional Chinese or alternative medicine |
| Shi Suofang 2020   | Clinical Observation of the Rehabilitation Formula for Banking up Earth to Generate Metal in Treating COVID-19 Patients with Deficiency of Lung and Spleen Syndrome in the Recovery Stage                                                                       | Traditional Chinese or alternative medicine |
| Wu Haiyan 2020     | Effect of emotional care based on traditional Chinese medicine combining respiratory muscle training on depression and anxiety among patients with COVID-19                                                                                                     | Traditional Chinese or alternative medicine |
| Wang 2020          | Exploring an Integrative Therapy for Treating COVID-19: A Randomized Controlled Trial                                                                                                                                                                           | Traditional Chinese or alternative medicine |
| Zhao 2020          | Yidu-toxicity blocking lung decoction ameliorates inflammation in severe pneumonia of SARS-COV-2 patients with Yidu-toxicity blocking lung syndrome by eliminating IL-6 and TNF-a                                                                               | Traditional Chinese or alternative medicine |
| Hu 2020            | Efficacy and Safety of Lianhuaqingwen Capsules, a repurposed Chinese Herb, in Patients with Coronavirus disease 2019: A multicenter, prospective, randomized controlled trial                                                                                   | Traditional Chinese or alternative medicine |
| Ye 2020            | Guideline-based Chinese herbal medicine treatment plus standard care for severe coronavirus disease 2019 (G-CHAMPS): evidence from China                                                                                                                        | Traditional Chinese or alternative medicine |
| Hu 2020            | Chansu Injection Improves the Respiratory Function of Severe COVID-19 Patients                                                                                                                                                                                  | Traditional Chinese or alternative medicine |
| Wen 2020           | [Effect of Xuebijing injection on inflammatory markers and disease outcome of coronavirus disease 2019]                                                                                                                                                         | Traditional Chinese or alternative medicine |
| Duan Can 2020      | Clinical Observation of Jinhua Qinggan Granule in Treating Pneumonia Infected by Novel Coronavirus                                                                                                                                                              | Traditional Chinese or alternative medicine |
| Hu Fen 2020        | Multi-center clinical observation of honeysuckle oral liquid combined with western medicine in the treatment of common type of COVID-19                                                                                                                         | Traditional Chinese or alternative medicine |
| Gupta 2021         | Prospective, randomized, open-label, blinded end point, two-arm, comparative clinical study to evaluate the efficacy and safety of a Fixed Ayurvedic Regimen (FAR) as add-on to conventional treatment in the management of mild and moderate COVID-19 patients | Traditional Chinese or alternative medicine |
| Yu 2020            | Effects of Lianhua Qingwen Granules Plus Arbidol on Treatment of Mild Corona Virus Disease-19. [Chinese]                                                                                                                                                        | Traditional Chinese or alternative medicine |
| Yan Bohua 2020     | Large-sample prospective clinical study of Huoxiangzhengqi Oral Liquid and Jinhaojiere Granules in the preventive intervention of COVID-19 in the community %J Chinese Journal of Chinese Materia Medica                                                        | Traditional Chinese or alternative medicine |
| Sun Huimin 2020    | Clinical Observation of Lianhua Qingke Granules in Treating Mild and Common New Type Coronavirus Pneumonia                                                                                                                                                      | Traditional Chinese or alternative medicine |
| Shi Suofang 2020   | Clinical Study on Treatment of 30 Cases of Qi and Yin Deficiency Syndrome in the Recovery Period of Novel Coronavirus Pneumonia by Comprehensive Therapy of Traditional Chinese Medicine                                                                        | Traditional Chinese or alternative medicine |
| Liu Lin 2020       | Effect of moxibustion on clinical symptoms, peripheral blood inflammatory indexes and T lymphocyte subsets in patients with new coronavirus pneumonia                                                                                                           | Traditional Chinese or alternative medicine |
| Huffin 2020        | Multicenter clinical observation of honeysuckle oral liquid combined with western medicine in the treatment of common type of new coronavirus pneumonia                                                                                                         | Traditional Chinese or alternative medicine |
| Zhang Youli 2020   | Analysis of Clinical Efficacy of Honeysuckle Oral Liquid in the Treatment of 80 Cases of New Coronavirus Pneumonia                                                                                                                                              | Traditional Chinese or alternative medicine |
| Ding Xiaojuan 2020 | Clinical efficacy and mechanism of Qingfei Touxie Fuzheng Recipe in the treatment of new coronavirus pneumonia                                                                                                                                                  | Traditional Chinese or alternative medicine |
| Ding Xiaojuan 2020 | Study on the Clinical Efficacy and Mechanism of Qingfei Toxie Fuzheng Decoction in the Treatment of Novel Coronavirus Pneumonia                                                                                                                                 | Traditional Chinese or alternative medicine |

|                     |                                                                                                                                                                                                                   |                                             |
|---------------------|-------------------------------------------------------------------------------------------------------------------------------------------------------------------------------------------------------------------|---------------------------------------------|
| Yu Ping 2020        | Efficacy of Lianhua Qingwen Granules combined with Arbidol in the treatment of mild new coronavirus pneumonia                                                                                                     | Traditional Chinese or alternative medicine |
| Duan Can 2020       | Clinical Observation of Jinhua Qinggan Granules in Treating New Type Coronavirus Infected Pneumonia                                                                                                               | Traditional Chinese or alternative medicine |
| Zhang Chuantao 2020 | Clinical study on the treatment of new type of coronavirus pneumonia (COVID-19)                                                                                                                                   | Traditional Chinese or alternative medicine |
| Fu Xiaoxia 2020     | Clinical Study on 37 Cases of Novel Coronavirus Pneumonia Treated by Integrated Traditional Chinese and Western Medicine                                                                                          | Traditional Chinese or alternative medicine |
| Yan Bohua 2020      | Large-sample prospective clinical study on the preventive intervention of COVID-19 in the community by the combined use of Huoxiangzhengqi oral liquid and Jinhaojiere granules                                   | Traditional Chinese or alternative medicine |
| Qiu Min 2020        | Observation on the Efficacy of Moxing Xuanfei Jiedu Decoction in the Treatment of New Type Coronavirus Pneumonia                                                                                                  | Traditional Chinese or alternative medicine |
| Wang Yali 2020      | Preliminary clinical efficacy analysis of oral Chinese medicine plus fumigation combined with super-high dose vitamin C in the treatment of new coronavirus pneumonia                                             | Traditional Chinese or alternative medicine |
| Sun Huimin 2020     | Study on the clinical efficacy of Lianhua Qingke Granules in the treatment of mild and common new coronavirus pneumonia                                                                                           | Traditional Chinese or alternative medicine |
| Liu Mailan 2020     | Research on the Significance and Operation Mode of Moxibustion Intervention for New Coronavirus Pneumonia Close Contact and Isolated Persons                                                                      | Traditional Chinese or alternative medicine |
| Edara 2021          | Infection and Vaccine-Induced Neutralizing-Antibody Responses to the SARS-CoV-2 B.1.617 Variants                                                                                                                  | Vaccine                                     |
| Guo 2021            | Safety and immunogenicity of an inactivated SARS-CoV-2 vaccine in healthy adults aged 18 years or older: A randomized, double-blind, placebo-controlled, phase 1/2 trial                                          | Vaccine                                     |
| Tanriover 2021      | Efficacy and safety of an inactivated whole-virion SARS-CoV-2 vaccine (CoronaVac): interim results of a double-blind, randomised, placebo-controlled, phase 3 trial in Turkey                                     | Vaccine                                     |
| Hsieh 2021          | Safety and immunogenicity of a Recombinant Stabilized Prefusion SARS-CoV-2 Spike Protein Vaccine (MVCCOV1901) Adjuvanted with CpG 1018 and Aluminum Hydroxide in healthy adults: A Phase 1, dose-escalation study | Vaccine                                     |
| Heath 2021          | Safety and Efficacy of NVX-CoV2373 Covid-19 Vaccine                                                                                                                                                               | Vaccine                                     |
| Han 2021            | Safety, tolerability, and immunogenicity of an inactivated SARS-CoV-2 vaccine (CoronaVac) in healthy children and adolescents: a double-blind, randomised, controlled, phase 1/2 clinical trial                   | Vaccine                                     |
| Borobia 2021        | Immunogenicity and reactogenicity of BNT162b2 booster in ChAdOx1-S-primed participants (CombiVacS): a multicentre, open-label, randomised, controlled, phase 2 trial                                              | Vaccine                                     |
| Frater 2021         | Safety and immunogenicity of the ChAdOx1 nCoV-19 (AZD1222) vaccine against SARS-CoV-2 in HIV infection: a single-arm substudy of a phase 2/3 clinical trial                                                       | Vaccine                                     |
| Pan 2021            | Immunogenicity and safety of a severe acute respiratory syndrome coronavirus 2 inactivated vaccine in healthy adults: randomized, double-blind, and placebo-controlled phase 1 and phase 2 clinical trials.       | Vaccine                                     |
| Takuva 2021         | Thromboembolic Events in the South African Ad26.COVS.2.S Vaccine Study.                                                                                                                                           | Vaccine                                     |
| AlKaabi 2021        | Effect of 2 Inactivated SARS-CoV-2 Vaccines on Symptomatic COVID-19 Infection in Adults: A Randomized Clinical Trial                                                                                              | Vaccine                                     |
| Madhi 2021          | Efficacy of the ChAdOx1 nCoV-19 Covid-19 Vaccine against the B.1.351 Variant                                                                                                                                      | Vaccine                                     |
| Barrett 2021        | Author Correction: Phase 1/2 trial of SARS-CoV-2 vaccine ChAdOx1 nCoV-19 with a booster dose induces multifunctional antibody responses                                                                           | Vaccine                                     |
| Iannone 2021        | Safety and efficacy of the BNT162b2 mRNA Covid-19 vaccine during Ixekizumab treatment for hidradenitis suppurativa                                                                                                | Vaccine                                     |
| Ward 2021           | Phase 1 randomized trial of a plant-derived virus-like particle vaccine for COVID-19.                                                                                                                             | Vaccine                                     |
| Pimpinelli 2021     | Fifth-week immunogenicity and safety of anti-SARS-CoV-2 BNT162b2 vaccine in patients with multiple myeloma and myeloproliferative malignancies on active treatment: preliminary data from a single institution.   | Vaccine                                     |



|                     |                                                                                                                                                                                                                                       |         |
|---------------------|---------------------------------------------------------------------------------------------------------------------------------------------------------------------------------------------------------------------------------------|---------|
| Stephenson 2021     | Immunogenicity of the Ad26.COVS Vaccine for COVID-19.                                                                                                                                                                                 | Vaccine |
| Freeman 2021        | Effects of different types of written vaccination information on COVID-19 vaccine hesitancy in the UK (OCEANS-III): a single-blind, parallel-group, randomised controlled trial.                                                      | Vaccine |
| PhilippeGobeil 2021 | Interim Report of a Phase 2 Randomized Trial of a Plant-Produced Virus-Like Particle Vaccine for Covid-19 in Healthy Adults Aged 18-64 and Older Adults Aged 65 and Older                                                             | Vaccine |
| Shinde 2021         | Efficacy of NVX-CoV2373 Covid-19 Vaccine against the B.1.351 Variant.                                                                                                                                                                 | Vaccine |
| Gras-Valenti 2021   | [Effectiveness of the first dose of BNT162b2 vaccine to preventing covid-19 in healthcare personnel.]                                                                                                                                 | Vaccine |
| Pan 2021            | Immunogenicity and safety of a SARS-CoV-2 inactivated vaccine in healthy adults: randomized, double-blind, and placebo-controlled phase 1 and phase 2 clinical trials                                                                 | Vaccine |
| Ella 2021           | Safety and immunogenicity of an inactivated SARS-CoV-2 vaccine, BBV152: a double-blind, randomised, phase 1 trial (Jan, 10.1016/S1473-3099(20)30942-7, 2021)                                                                          | Vaccine |
| Li 2021             | Safety and immunogenicity of the SARS-CoV-2 BNT162b1 mRNA vaccine in younger and older Chinese adults: a randomized, placebo-controlled, double-blind phase 1 study.                                                                  | Vaccine |
| Chappell 2021       | Safety and immunogenicity of an MF59-adjuvanted spike glycoprotein-clamp vaccine for SARS-CoV-2: a randomised, double-blind, placebo-controlled, phase 1 trial.                                                                       | Vaccine |
| Sadoff 2021         | Safety and Efficacy of Single-Dose Ad26.COVS Vaccine against Covid-19.                                                                                                                                                                | Vaccine |
| Goepfert 2021       | Safety and immunogenicity of SARS-CoV-2 recombinant protein vaccine formulations in healthy adults: interim results of a randomised, placebo-controlled, phase 1-2, dose-ranging study.                                               | Vaccine |
| Ryzhikov 2021       | A single blind, placebo-controlled randomized study of the safety, reactogenicity and immunogenicity of the "EpiVacCorona" Vaccine for the prevention of COVID-19, in volunteers aged 18-60 years (phase I-II) (vol 11, pg 283, 2021) | Vaccine |
| Ryzhikov 2021       | A SINGLE BLIND, PLACEBO-CONTROLLED RANDOMIZED STUDY OF THE SAFETY, REACTOGENICITY AND IMMUNOGENICITY OF THE "EPIVACCORONA" VACCINE FOR THE PREVENTION OF COVID-19, IN VOLUNTEERS AGED 18-60 YEARS (PHASE I-II)                        | Vaccine |
| Voysey 2021         | Single-dose administration and the influence of the timing of the booster dose on immunogenicity and efficacy of ChAdOx1 nCoV-19 (AZD1222) vaccine: a pooled analysis of four randomised trials (vol 397, pg 881, 2021)               | Vaccine |
| Pu 2021             | The safety and immunogenicity of an inactivated SARS-CoV-2 vaccine in Chinese adults aged 18-59 years: a phase I randomized, double-blinded, controlled trial                                                                         | Vaccine |
| Kadali 2021         | Adverse effects of COVID-19 mRNA-1273 vaccine: A randomized, cross-sectional study on healthcare workers with detailed self-reported symptoms.                                                                                        | Vaccine |
| Hong-XingPan 2021   | Immunogenicity and Safety of a SARS-CoV-2 Inactivated Vaccine (KCONVAC) in Healthy Adults: Two Randomized, Double-blind, and Placebo-controlled Phase 1/2 Clinical Trials                                                             | Vaccine |
| SusanMBueno 2021    | Interim Report: Safety And Immunogenicity Of An Inactivated Vaccine Against Sars-Cov-2 In Healthy Chilean Adults In A Phase 3 Clinical Trial                                                                                          | Vaccine |
| Emary 2021          | Efficacy of ChAdOx1 nCoV-19 (AZD1222) vaccine against SARS-CoV-2 variant of concern 202012/01 (B.1.1.7): an exploratory analysis of a randomised controlled trial                                                                     | Vaccine |
| Yang 2021           | Safety and immunogenicity of a recombinant tandem-repeat dimeric RBD-based protein subunit vaccine (ZF2001) against COVID-19 in adults: two randomised, double-blind, placebo-controlled, phase 1 and 2 trials                        | Vaccine |
| Madhi 2021          | Efficacy of the ChAdOx1 nCoV-19 Covid-19 Vaccine against the B.1.351 Variant                                                                                                                                                          | Vaccine |
| Stephenson 2021     | Immunogenicity of the Ad26.COVS Vaccine for COVID-19                                                                                                                                                                                  | Vaccine |
| Logunov 2021        | Safety and efficacy of an rAd26 and rAd5 vector-based heterologous prime-boost COVID-19 vaccine: an interim analysis of a randomised controlled phase 3 trial in Russia (vol 397, pg 671, 2021)                                       | Vaccine |
| Ella 2021           | Safety and immunogenicity of an inactivated SARS-CoV-2 vaccine, BBV152: interim results from a double-blind, randomised, multicentre, phase 2 trial, and 3-month follow-up of a double-blind, randomised phase 1 trial                | Vaccine |

|                             |                                                                                                                                                                                                                                 |         |
|-----------------------------|---------------------------------------------------------------------------------------------------------------------------------------------------------------------------------------------------------------------------------|---------|
| ArturoChang-Monteagudo 2021 | A single dose of SARS CoV 2 FINLAY FR 1A dimeric RBD recombinant vaccine enhances neutralization response in COVID19 convalescents, with excellent safety profile. A preliminary report of an open-label phase 1 clinical trial | Vaccine |
| VivekShinde 2021            | Preliminary Efficacy of the NVX-CoV2373 Covid-19 Vaccine Against the B.1.351 Variant                                                                                                                                            | Vaccine |
| Ramasamy 2020               | Safety and immunogenicity of ChAdOx1 nCoV-19 vaccine administered in a prime-boost regimen in young and old adults (COV002): a single-blind, randomised, controlled, phase 2/3 trial (vol 396, pg 1979, 2020)                   | Vaccine |
| Voysey 2021                 | Single-dose administration and the influence of the timing of the booster dose on immunogenicity and efficacy of ChAdOx1 nCoV-19 (AZD1222) vaccine: a pooled analysis of four randomised trials                                 | Vaccine |
| Chu 2021                    | A preliminary report of a randomized controlled phase 2 trial of the safety and immunogenicity of mRNA-1273 SARS-CoV-2 vaccine                                                                                                  | Vaccine |
| Voysey 2021                 | Single Dose Administration, and the Influence of the Timing of the Booster Dose on Immunogenicity and Efficacy of ChAdOx1 nCoV-19 (AZD1222) Vaccine (preprint)                                                                  | Vaccine |
| Emary 2021                  | Efficacy of ChAdOx1 nCoV-19 (AZD1222) Vaccine Against SARS-CoV-2 VOC-202012/01 (B.1.1.7) (preprint)                                                                                                                             | Vaccine |
| Wu 2021                     | Safety, tolerability, and immunogenicity of an inactivated SARS-CoV-2 vaccine (CoronaVac) in healthy adults aged 60 years and older: a randomised, double-blind, placebo-controlled, phase 1/2 clinical trial                   | Vaccine |
| Chappell 2021               | First Report of a Phase 1 Randomised Trial of Molecular Clamp-Stabilised Spike Protein-Based and MF59-Adjuvanted Vaccine for SARS-CoV-2 (preprint)                                                                              | Vaccine |
| Logunov 2021                | Safety and efficacy of an rAd26 and rAd5 vector-based heterologous prime-boost COVID-19 vaccine: an interim analysis of a randomised controlled phase 3 trial in Russia.                                                        | Vaccine |
| Voysey 2021                 | Safety and efficacy of the ChAdOx1 nCoV-19 vaccine (AZD1222) against SARS-CoV-2: an interim analysis of four randomised controlled trials in Brazil, South Africa, and the UK (vol 397, pg 99, 2021)                            | Vaccine |
| PaulRHunter 2021            | Estimating the effectiveness of the Pfizer COVID-19 BNT162b2 vaccine after a single dose. A reanalysis of a study of real-world vaccination outcomes from Israel.                                                               | Vaccine |
| Voysey 2021                 | Safety and efficacy of the ChAdOx1 nCoV-19 vaccine (AZD1222) against SARS-CoV-2: an interim analysis of four randomised controlled trials in Brazil, South Africa, and the UK                                                   | Vaccine |
| Richmond 2021               | Safety and immunogenicity of S-Trimer (SCB-2019), a protein subunit vaccine candidate for COVID-19 in healthy adults: a phase 1, randomised, double-blind, placebo-controlled trial                                             | Vaccine |
| Ella 2021                   | Safety and immunogenicity of an inactivated SARS-CoV-2 vaccine, BBV152: a double-blind, randomised, phase 1 trial.                                                                                                              | Vaccine |
| Sadoff 2021                 | Interim Results of a Phase 1-2a Trial of Ad26.COVS2 Covid-19 Vaccine.                                                                                                                                                           | Vaccine |
| Folegatti 2020              | Safety and immunogenicity of the ChAdOx1 nCoV-19 vaccine against SARS-CoV-2: a preliminary report of a phase 1/2, single-blind, randomised controlled trial (vol 396, pg 467, 2020)                                             | Vaccine |
| Baden 2020                  | Efficacy and Safety of the mRNA-1273 SARS-CoV-2 Vaccine.                                                                                                                                                                        | Vaccine |
| ShilongYang 2020            | Safety and immunogenicity of a recombinant tandem-repeat dimeric RBD protein vaccine against COVID-19 in adults: pooled analysis of two randomized, double-blind, placebo-controlled, phase 1 and 2 trials                      | Vaccine |
| RachesElla 2020             | Safety and immunogenicity clinical trial of an inactivated SARS-CoV-2 vaccine, BBV152 (a phase 2, double-blind, randomised controlled trial) and the persistence of immune responses from a phase 1 follow-up report            | Vaccine |
| Folegatti 2020              | Safety and immunogenicity of the ChAdOx1 nCoV-19 vaccine against SARS-CoV-2: a preliminary report of a phase 1/2, single-blind, randomised controlled trial.                                                                    | Vaccine |
| Polack 2020                 | Safety and Efficacy of the BNT162b2 mRNA Covid-19 Vaccine                                                                                                                                                                       | Vaccine |
| Voysey 2020                 | Safety and efficacy of the ChAdOx1 nCoV-19 vaccine (AZD1222) against SARS-CoV-2: an interim analysis of four randomised controlled trials in Brazil, South Africa, and the UK                                                   | Vaccine |

|                 |                                                                                                                                                                                                                                    |                  |
|-----------------|------------------------------------------------------------------------------------------------------------------------------------------------------------------------------------------------------------------------------------|------------------|
| Zhang 2020      | Safety, tolerability, and immunogenicity of an inactivated SARS-CoV-2 vaccine in healthy adults aged 18-59 years: a randomised, double-blind, placebo-controlled, phase 1/2 clinical trial.                                        | Vaccine          |
| Ramasamy 2020   | Safety and immunogenicity of ChAdOx1 nCoV-19 vaccine administered in a prime-boost regimen in young and old adults (COV002): a single-blind, randomised, controlled, phase 2/3 trial                                               | Vaccine          |
| Che 2020        | Randomized, double-blinded and placebo-controlled phase II trial of an inactivated SARS-CoV-2 vaccine in healthy adults                                                                                                            | Vaccine          |
| Ward 2020       | Phase 1 trial of a Candidate Recombinant Virus-Like Particle Vaccine for Covid-19 Disease Produced in Plants                                                                                                                       | Vaccine          |
| Walsh 2020      | Safety and Immunogenicity of Two RNA-Based Covid-19 Vaccine Candidates.                                                                                                                                                            | Vaccine          |
| Xia 2020        | Safety and immunogenicity of an inactivated SARS-CoV-2 vaccine, BBIBP-CorV: a randomised, double-blind, placebo-controlled, phase 1/2 trial                                                                                        | Vaccine          |
| Pu 2020         | An in-depth investigation of the safety and immunogenicity of an inactivated SARS-CoV-2 vaccine (preprint)                                                                                                                         | Vaccine          |
| Anderson 2020   | Safety and Immunogenicity of SARS-CoV-2 mRNA-1273 Vaccine in Older Adults                                                                                                                                                          | Vaccine          |
| Sadoff 2020     | Safety and immunogenicity of the Ad26.COVS COVID-19 vaccine candidate: interim results of a phase 1/2a, double-blind, randomized, placebo-controlled trial (preprint)                                                              | Vaccine          |
| Keech 2020      | Phase 1-2 Trial of a SARS-CoV-2 Recombinant Spike Protein Nanoparticle Vaccine                                                                                                                                                     | Vaccine          |
| Walsh 2020      | RNA-Based COVID-19 Vaccine BNT162b2 Selected for a Pivotal Efficacy Study (preprint)                                                                                                                                               | Vaccine          |
| Zhang 2020      | Immunogenicity and Safety of a SARS-CoV-2 Inactivated Vaccine in Healthy Adults Aged 18-59 years: Report of the Randomized, Double-blind, and Placebo-controlled Phase 2 Clinical Trial (preprint)                                 | Vaccine          |
| Mulligan 2020   | Phase 1/2 study of COVID-19 RNA vaccine BNT162b1 in adults                                                                                                                                                                         | Vaccine          |
| Xia 2020        | Effect of an Inactivated Vaccine Against SARS-CoV-2 on Safety and Immunogenicity Outcomes: Interim Analysis of 2 Randomized Clinical Trials                                                                                        | Vaccine          |
| Keech 2020      | First-in-Human Trial of a SARS CoV 2 Recombinant Spike Protein Nanoparticle Vaccine (preprint)                                                                                                                                     | Vaccine          |
| Folegatti 2020  | Safety and immunogenicity of the ChAdOx1 nCoV-19 vaccine against SARS-CoV-2: a preliminary report of a phase 1/2, single-blind, randomised controlled trial                                                                        | Vaccine          |
| Flaxman 2021    | Tolerability and Immunogenicity After a Late Second Dose or a Third Dose of ChAdOx1 nCoV-19 (AZD1222) (preprint)                                                                                                                   | Vaccine          |
| Folegatti 2020  | Erratum: Department of Error (The Lancet (2020) 396(10249) (467,Äi478), (S0140673620316044), (10.1016/S0140-6736(20)31604-4))                                                                                                      | Vaccine          |
| Torres 2021     | Effect of Physician-Delivered COVID-19 Public Health Messages and Messages Acknowledging Racial Inequity on Black and White Adults; Knowledge, Beliefs, and Practices Related to COVID-19: A Randomized Clinical Trial             | Wrong population |
| Vandormael 2021 | Effect of a wordless, animated, social media video intervention on COVID-19 prevention: an online randomized controlled trial of 15,163 adults in the USA, Mexico, UK, Germany, and Spain.                                         | Wrong population |
| Wu 2021         | Tolerability, Safety, Pharmacokinetics, and Immunogenicity of a Novel SARS-CoV-2 Neutralizing Antibody, Etesevimab in Chinese Healthy Adults: A Randomized, Double-Blind, Placebo-Controlled, First-In-Human Phase 1 Study.        | Wrong population |
| Jaber 2021      | Effect of the use of an endotracheal tube and stylet versus an endotracheal tube alone on first-attempt intubation success: a multicentre, randomised clinical trial in 999 patients.                                              | Wrong population |
| Oakes 2021      | Effect of Opt-In vs Opt-Out Framing on Enrollment in a COVID-19 Surveillance Testing Program: The COVID SAFE Randomized Clinical Trial.                                                                                            | Wrong population |
| Backer 2021     | A randomized, double-blind, placebo-controlled phase 1 trial of inhaled and intranasal niclosamide: A broad spectrum antiviral candidate for treatment of COVID-19.                                                                | Wrong population |
| Bentur 2021     | Phase 1 Randomized Placebo-Controlled Study in Healthy Adult Volunteers to Evaluate the Safety, Tolerability, and Pharmacokinetics of Orally Inhaled Aerosolized Hydroxychloroquine Sulfate, Äi A Potential Treatment for COVID-19 | Wrong population |

|                   |                                                                                                                                                                                                                                                               |                  |
|-------------------|---------------------------------------------------------------------------------------------------------------------------------------------------------------------------------------------------------------------------------------------------------------|------------------|
| Fiol-DeRoque 2021 | Effectiveness of a Mobile Phone-Based Intervention to Reduce Mental Health Problems in Healthcare Workers During the COVID-19 Pandemic: A Randomized Controlled Trial (PsyCovidApp Trial) (preprint)                                                          | Wrong population |
| Moisset 2021      | Nasopharyngeal swab-induced pain for SARS-CoV-2 screening: a randomised controlled trial of conventional and self-swabbing.                                                                                                                                   | Wrong population |
| Alsan 2020        | Comparison of Knowledge and Information-Seeking Behavior After General COVID-19 Public Health Messages and Messages Tailored for Black and Latinx Communities : A Randomized Controlled Trial.                                                                | Wrong population |
| Ikonomidis 2020   | Tocilizumab improves oxidative stress and endothelial glycocalyx: a mechanism that may explain the effects of biological treatment on COVID-19. (Special Issue: COVID-19 and treatments: particular emphasis on potential toxic effects.)                     | Wrong population |
| Frandell 2020     | The Effects of Electronic Alert Letters in the Time of COVID-19 (preprint)                                                                                                                                                                                    | Wrong population |
| Duong-Quy 2020    | The use of exhaled nitric oxide and peak expiratory flow to demonstrate improved breathability and antimicrobial properties of novel face mask made with sustainable filter paper and Folium Plectranthii amboinicii oil: additional option for mask shortage | Wrong population |
| Schumacher 2020   | The impact of respiratory protective equipment on difficult airway management: a randomised, crossover, simulation study                                                                                                                                      | Wrong population |
| Villar 2020       | Dexamethasone treatment for the acute respiratory distress syndrome: a multicentre, randomised controlled trial                                                                                                                                               | Wrong population |

**Supplementary Table 1:** Characteristics of included studies

| Study                                | Publication status Registration | Number of participants | Country  | Mean age | % Male | Comorbidities                                                                                                                                      | Type of care                      | Severity                                   | % Mechanical ventilation (baseline) | Detailed ventilation (%)                                                                          | Treatments (dose and duration)                                                                                                                                                                                                  | Outcomes                                                                                                                                                         |
|--------------------------------------|---------------------------------|------------------------|----------|----------|--------|----------------------------------------------------------------------------------------------------------------------------------------------------|-----------------------------------|--------------------------------------------|-------------------------------------|---------------------------------------------------------------------------------------------------|---------------------------------------------------------------------------------------------------------------------------------------------------------------------------------------------------------------------------------|------------------------------------------------------------------------------------------------------------------------------------------------------------------|
| Adas, 2021 <sup>1</sup>              | Published NCT04392778           | 20                     | Turkey   | 56       | 63     | NR                                                                                                                                                 | Inpatient Intensive care (100.0%) | Severe (100%)<br>Severe: Critical (100.0%) | 100                                 | Iv (100.0%)                                                                                       | mesenchymal stem cells (3 x 10 <sup>6</sup> cells/kg over three consecutive infusions on days 0, 3, 6)<br>standard care                                                                                                         | Mortality<br>Adverse effects leading to discontinuation<br>Duration of hospitalization<br>ICU length of stay                                                     |
| Agarwal, 2020<br>PLACID <sup>2</sup> | Published CTRI/2020/04/024775   | 464                    | India    | 52       | 76.3   | Tuberculosis (4.1%)<br>COPD (3.2%)<br>Coronary artery disease (6.9%)<br>Cerebrovascular disease (0.9%)<br>Diabetes (43.1%)<br>Hypertension (37.3%) | Inpatient                         | Mild/Moderate (100.0%)                     | 0.2                                 | Supplemental oxygen (21.7%)<br>High-flow or niv (0.2%)                                            | convalescent plasma (200 mL given twice)<br>standard care                                                                                                                                                                       | Mortality<br>Mechanical ventilation<br>Viral clearance<br>Duration of hospitalization                                                                            |
| AlQahtani, 2021 <sup>3</sup>         | Published NCT04356534           | 40                     | Bahrain  | 51.6     | 80     | Chronic lung disease (7.5%)<br>Cardiac diseases (10.0%)<br>Diabetes (40.0%)<br>Hypertension (25.0%)                                                | Inpatient                         | Severe (100%)<br>Severe: Critical (7.5%)   | 10                                  | Nasal cannula or face mask (90.0%)<br>Nonrebreather mask or high-flow (10.0%)<br>Niv or iv (0.0%) | convalescent plasma (200mL over 2 hours daily x 2 days)<br>standard care                                                                                                                                                        | Mortality<br>Mechanical ventilation<br>Duration of hospitalization<br>Duration of ventilation                                                                    |
| Ali, 2021 <sup>4</sup>               | Published NCT04521309           | 50                     | Pakistan | 56.5     | 70     | Chronic lung disease (10.0%)<br>Cardiac disease (8.0%)<br>Diabetes (36.0%)<br>Hypertension (52.0%)                                                 | Inpatient                         | Severe (100%)<br>Severe: Critical (56.0%)  | 56                                  | Supplemental oxygen (44.0%)<br>Niv or hfo (54.0%)<br>Iv (2.0%)                                    | anti-COVID intravenous immunoglobulin (0.15 g/kg)<br>anti-COVID intravenous immunoglobulin (0.2 g/kg)<br>anti-COVID intravenous immunoglobulin (0.25 g/kg)<br>anti-COVID intravenous immunoglobulin (0.3 g/kg)<br>standard care | Mortality<br>Mechanical ventilation<br>Duration of hospitalization<br>Duration of ventilation<br>Time to symptom/clinical improvement<br>Time to viral clearance |

|                                                                                |                                  |    |               |      |      |                                                                                                                                                                                                                    |                                     |                                                   |      |                                                                                                                                          |                                                                                                                                                                                      |                                                                                                                                                                                               |
|--------------------------------------------------------------------------------|----------------------------------|----|---------------|------|------|--------------------------------------------------------------------------------------------------------------------------------------------------------------------------------------------------------------------|-------------------------------------|---------------------------------------------------|------|------------------------------------------------------------------------------------------------------------------------------------------|--------------------------------------------------------------------------------------------------------------------------------------------------------------------------------------|-----------------------------------------------------------------------------------------------------------------------------------------------------------------------------------------------|
| Avendano-Sola, 2020<br>ConPlas-19 <sup>5</sup>                                 | Pre-print<br>NCT04345523         | 81 | Spain         | 60.8 | 54.3 | Chronic lung disease (12.3%)<br>Cardiovascular disease (18.5%)<br>Diabetes (21.0%)<br>Hypertension (39.5%)                                                                                                         | Inpatient                           | Severe (100%)                                     | NR   | Supplemental oxygen (71.6%)                                                                                                              | convalescent plasma (250-300 mL given once)<br>standard care                                                                                                                         | Mortality<br>Mechanical ventilation<br>Viral clearance<br>TRALI<br>Duration of hospitalization<br>Ventilator-free days<br>Duration of ventilation<br>Time to symptom/clinical improvement     |
| Bajpai, 2020 <sup>6</sup>                                                      | Pre-print<br>NCT04346446         | 31 | India         | 48.2 | 75.9 | Cardiopulmonary (0.0%)<br>COPD (0.0%)<br>Coronary artery disease (0.0%)                                                                                                                                            | Inpatient                           | Severe (100%)                                     | NR   | Supplemental oxygen (100.0%)                                                                                                             | convalescent plasma (250 mL given twice on consecutive days)<br>fresh frozen plasma (250 mL given twice on consecutive days)                                                         | Mortality<br>Mechanical ventilation<br>Allergic reactions<br>Duration of hospitalization<br>ICU length of stay                                                                                |
| Balcells, 2021 <sup>7</sup>                                                    | Published<br>NCT04375098         | 58 | Chile         | 65.8 | 50   | Asthma (5.2%)<br>Cerebrovascular disease (5.2%)<br>Diabetes (36.2%)<br>Hypertension (67.2%)                                                                                                                        | Inpatient                           | NR                                                | 0    | Supplemental oxygen (79.3%)<br>Mechanical ventilation (0.0%)                                                                             | convalescent plasma (early) (2 units of 200 mL separated by 24h)<br>convalescent plasma (deferred) (2 units of 200 mL separated by 24h)                                              | Mortality<br>Mechanical ventilation<br>Adverse effects leading to discontinuation<br>Viral clearance<br>TRALI<br>Duration of hospitalization<br>ICU length of stay<br>Duration of ventilation |
| Bandopadhyay, 2020 <sup>8</sup>                                                | Pre-print<br>CTR1/2020/05/025209 | 33 | India         | 55   | 82.6 | NR                                                                                                                                                                                                                 | Inpatient                           | Mild/Moderate (28.3%)<br>Severe: Critical (71.7%) | NR   | NR                                                                                                                                       | convalescent plasma (200 mL given twice)<br>standard care                                                                                                                            | NR                                                                                                                                                                                            |
| Bennett-Guerrero, 2021<br>Stony Brook Medicine COVID Plasma Trial <sup>9</sup> | Published<br>NCT04344535         | 74 | United States | 66.4 | 59.5 | Chronic obstructive pulmonary disease (12.2%)<br>Chronic heart failure (17.6%)<br>Coronary artery disease, coronary artery bypass graft surgery, percutaneous coronary intervention, myocardial infarction (20.3%) | Inpatient<br>Intensive care (27.0%) | NR                                                | 25.7 | Nasal cannula or mask (46.0%)<br>High-flow or continuous positive airway pressure/bi level positive airway pressure (6.8%)<br>IV (18.9%) | convalescent plasma (single dose of 2 U over 1–4 hours, total volume approximately 480 mL)<br>standard plasma (single dose of 2 U over 1–4 hours, total volume approximately 480 mL) | Mortality<br>Adverse effects leading to discontinuation<br>Allergic reactions<br>Ventilator-free days                                                                                         |

|                                               |                                  |     |                                     |      |      |                                                                                                                                  |            |                        |      |                                                                                                                                                                                                                   |                                                                                                                                                                                                              |                                                                                                                               |
|-----------------------------------------------|----------------------------------|-----|-------------------------------------|------|------|----------------------------------------------------------------------------------------------------------------------------------|------------|------------------------|------|-------------------------------------------------------------------------------------------------------------------------------------------------------------------------------------------------------------------|--------------------------------------------------------------------------------------------------------------------------------------------------------------------------------------------------------------|-------------------------------------------------------------------------------------------------------------------------------|
|                                               |                                  |     |                                     |      |      | Diabetes (33.8%)<br>Hypertension (68.9%)                                                                                         |            |                        |      |                                                                                                                                                                                                                   |                                                                                                                                                                                                              |                                                                                                                               |
| Bégin, 2021<br>CONCOR-1 <sup>10</sup>         | Pre-print<br>NCT04348656         | 940 | Canada,<br>United States,<br>Brazil | 67.5 | 59.1 | Respiratory diseases (24.1%)<br>Cardiac disease (62.0%)<br>Diabetes (35.0%)                                                      | Inpatient  | Severe (100%)          | NR   | Supplemental oxygen (100.0%)<br>Intubation (0.0%)                                                                                                                                                                 | convalescent plasma (500 mL from one or two donors)<br>standard care                                                                                                                                         | Mortality<br>TRALI<br>TACO<br>Allergic reactions<br>Duration of hospitalization<br>ICU length of stay<br>Ventilator-free days |
| Carmenate, 2021<br>SENTAD-COVID <sup>11</sup> | Pre-print<br>NCT04473170         | 141 | United Arab Emirates                | 45.1 | 92.8 | Chronic smoking and asthma (10.8%)<br>Cardiovascular disease and dyslipidemia (9.3%)<br>Diabetes (22.3%)<br>Hypertension (26.6%) | Inpatient  | Mild/Moderate (68.3%)  | 31.7 | Oxygen by mass or nasal prongs (12.9%)<br>Niv or hfo (7.2%)<br>Iv (2.2%)<br>Ventilation plus additional support, including vasopressor, renal replacement therapy, or extracorporeal membrane oxygenation (22.3%) | nebulized peripheral blood non-hematopoietic enriched stem cells (two doses of nebulized cells on days 0 and 1)<br>standard care                                                                             | Mortality                                                                                                                     |
| Chen_1, 2020<br>BLAZE-1 <sup>12</sup>         | Published<br>NCT04427501         | 459 | United States                       | 45.3 | 44.9 | NR                                                                                                                               | Outpatient | Mild/Moderate (100.0%) | 0    | Mechanical ventilation (0.0%)                                                                                                                                                                                     | bamlanivimab (700 mg single intravenous infusion over 1 hour)<br>bamlanivimab (2800 mg single intravenous infusion over 1 hour)<br>bamlanivimab (7000 mg single intravenous infusion over 1 hour)<br>placebo | Mortality<br>Admission to hospital<br>Adverse effects leading to discontinuation<br>Allergic reactions                        |
| Chew, 2021<br>ACTIV-2/A5401 <sup>13</sup>     | Data from authors<br>NCT04518410 | 0   | United States                       | 44   | 47   | NR                                                                                                                               | Outpatient | NR                     | 0    | Unspecified ventilation (0.0%)                                                                                                                                                                                    | bamlanivimab (7000 mg single dose)<br>placebo                                                                                                                                                                | NR                                                                                                                            |

|                                           |                                                          |      |                                                  |      |      |                                                                                                                                                                                                     |                                   |                                            |      |                                                                                             |                                                                                                                                                                                                         |                                                                                                                                                                          |
|-------------------------------------------|----------------------------------------------------------|------|--------------------------------------------------|------|------|-----------------------------------------------------------------------------------------------------------------------------------------------------------------------------------------------------|-----------------------------------|--------------------------------------------|------|---------------------------------------------------------------------------------------------|---------------------------------------------------------------------------------------------------------------------------------------------------------------------------------------------------------|--------------------------------------------------------------------------------------------------------------------------------------------------------------------------|
| Dougan, 2021<br>BLAZE-1 <sup>14</sup>     | Published<br>NCT04427501                                 | 1035 | United States                                    | 53.8 | 48   | Copd (8.1%)<br>Cardiovascular disease (7.3%)<br>Diabetes (27.5%)<br>Hypertension (33.5%)                                                                                                            | Outpatient                        | Mild/Moderate (100.0%)                     | 0    | lv (0.0%)                                                                                   | bamlanivimab, estesevimab (2800 mg of each single dose) placebo                                                                                                                                         | Mortality<br>Admission to hospital<br>Duration of hospitalization<br>Time to symptom/clinical improvement<br>Time to viral clearance                                     |
| Eom, 2021 <sup>15</sup>                   | Pre-print<br>NCT04602000<br>; EudraCT:<br>2020-003369-20 | 327  | South Korea, Romania, Spain, and United States   | 51.3 | 48.6 | Uncontrolled copd (0.0%)<br>Uncontrolled bronchiectasis (0.0%)<br>Uncontrolled asthma (0.0%)<br>Congestive heart failure (0.0%)<br>Uncontrolled diabetes (0.0%)<br>Uncontrolled hypertension (0.0%) | Outpatient                        | Mild/Moderate (100.0%)                     | 0    | Unspecified ventilation (0.0%)                                                              | CT-P59 monoclonal antibody (40 mg/kg single dose via intravenous infusion over 90 ± 15 mins)<br>CT-P59 monoclonal antibody (80 mg/kg single dose via intravenous infusion over 90 ± 15 mins)<br>placebo | Mortality<br>Mechanical ventilation<br>Admission to hospital<br>Viral clearance<br>Allergic reactions<br>Time to symptom/clinical improvement<br>Time to viral clearance |
| Estcourt, 2021<br>REMAP-CAP <sup>16</sup> | Pre-print<br>NCT02735707                                 | 2000 | Australia, Canada, United Kingdom, United States | 60.2 | 67.7 | Asthma/copd (19.4%)<br>Respiratory disease (23.2%)<br>Severe cardiovascular disease (8.4%)<br>Diabetes (30.6%)                                                                                      | Inpatient Intensive care (100.0%) | Severe (100%)                              | 77.8 | None/supplementary oxygen (0.1%)<br>Hfo (21.9%)<br>Niv (45.3%)<br>lv (32.5%)<br>Ecmo (0.1%) | convalescent plasma (550 ± 150 mL within 48 hours of randomization)<br>standard care                                                                                                                    | Mortality<br>Allergic reactions<br>Ventilator-free days                                                                                                                  |
| Faqihi, 2021 <sup>17</sup>                | Published<br>ISRCTN21363594                              | 87   | Saudi Arabia                                     | 48.5 | 82.8 | Coronary artery disease (2.3%)<br>Diabetes (20.7%)<br>Hypertension (40.2%)                                                                                                                          | Inpatient Intensive care (100.0%) | Severe (100%)<br>Severe: Critical (100.0%) | 100  | lv (100.0%)                                                                                 | therapeutic plasma exchange (1 unit daily up to 5 doses)<br>standard care                                                                                                                               | Mortality<br>Adverse effects leading to discontinuation<br>Allergic reactions<br>ICU length of stay<br>Duration of ventilation                                           |
| Gaborit, 2021<br>POLYCOR <sup>18</sup>    | Pre-print<br>NCT04453384                                 | 18   | France                                           | 71   | 64.7 | Asthma (17.6%)<br>Cardiovascular/cerebrovascular disease (29.4%)<br>Diabetes (11.8%)<br>Hypertension (47.1%)                                                                                        | Inpatient                         | Mild/Moderate (100.0%)                     | 5.9  | Supplemental oxygen (82.3%)<br>Niv or high flow oxygen (5.9%)                               | XAV-19 (0.5 mg/kg at day 1 and day 5)<br>XAV-19 (2 mg/kg at day 1 and day 5)<br>XAV-19 (2 mg/kg at day 1)<br>placebo                                                                                    | Mortality<br>Mechanical ventilation<br>Adverse effects leading to discontinuation<br>Viral clearance<br>Allergic reactions<br>Duration of hospitalization                |



|                                             |                                   |     |                                      |      |      |                                                                                                                                                        |                                  |                                           |      |                                                                      |                                                                                                                                                                                                                                                                                                                                    |                                                                                                          |
|---------------------------------------------|-----------------------------------|-----|--------------------------------------|------|------|--------------------------------------------------------------------------------------------------------------------------------------------------------|----------------------------------|-------------------------------------------|------|----------------------------------------------------------------------|------------------------------------------------------------------------------------------------------------------------------------------------------------------------------------------------------------------------------------------------------------------------------------------------------------------------------------|----------------------------------------------------------------------------------------------------------|
| Gharbhara n, 2021<br>ConCOVID <sup>19</sup> | Published<br>NCT04342182          | 86  | Netherlands                          | 62   | 72.1 | Pulmonary (26.7%)<br>Cardiac (23.3%)<br>Diabetes (24.4%)<br>Hypertension (25.6%)                                                                       | Inpatient Intensive care (15.1%) | Severe (100%)<br>Severe: Critical (15.1%) | 90.7 | Supplemental oxygen, high-flow, or niv (75.6%)<br>Iv or ecmo (15.1%) | convalescent plasma (1 unit single transfusion with possibility of a second unit after 5 days for patients without clinical response and a persistently positive RT-PCR) standard care                                                                                                                                             | Mortality<br>Duration of hospitalization                                                                 |
| Gharebaghi, 2020 <sup>20</sup>              | Published<br>IRCT20200501047259N1 | 59  | Iran                                 | 56   | 69.5 | Chronic lung disease (3.4%)<br>Tuberculosis (0.0%)<br>Pulmonary fibrosis (0.0%)<br>Diabetes (27.1%)<br>Hypertension (22.0%)                            | Inpatient                        | Severe (100%)                             | NR   | NR                                                                   | intravenous immunoglobulin (4 x of 5 g (total 20 g) daily for three consecutive days) placebo                                                                                                                                                                                                                                      | Mortality<br>Duration of hospitalization<br>ICU length of stay                                           |
| Gonzalez, 2021 <sup>21</sup>                | Pre-print<br>NCT04381858          | 190 | Mexico                               | 58   | 62.6 | Pulmonary disease (4.7%)<br>Heart disease (3.2%)<br>Diabetes (34.7%)<br>Hypertension (35.3%)                                                           | Inpatient                        | Severe (100%)                             | 100  | Invasive mechanical ventilation (85.3%)<br>High-flow oxygen (14.7%)  | convalescent plasma (200 mL in 2 hours for 2 days)<br>intravenous immunoglobulin (0.3 g/kg 8-hour infusion every 24 hours for 5 days)                                                                                                                                                                                              | Mortality<br>Adverse effects leading to discontinuation<br>Allergic reactions                            |
| Gottlieb, 2021<br>BLAZE-1 <sup>22</sup>     | Published<br>NCT04427501          | 592 | United States                        | 44.7 | 45.4 | NR                                                                                                                                                     | Outpatient                       | Mild/Moderate (99.5%)                     | 0    | Unspecified ventilation (0.0%)                                       | bamlanivimab (700 mg given as a single, 1-hour, intravenous infusion)<br>bamlanivimab (2800 mg given as a single, 1-hour, intravenous infusion)<br>bamlanivimab (7000 mg given as a single, 1-hour, intravenous infusion)<br>bamlanivimab, etesevimab (2800 mg of each given as a single, 1-hour, intravenous infusion)<br>placebo | Viral clearance<br>Allergic reactions<br>Time to symptom/clinical improvement<br>Time to viral clearance |
| Gupta, 2021<br>COMET-ICE <sup>23</sup>      | Pre-print<br>NCT04545060          | 868 | United States, Canada, Brazil, Spain | 53   | 45.6 | Chronic obstructive pulmonary disease; 15.8 (4.1%)<br>Congestive heart failure; new york heart association class ii or more (0.7%)<br>Diabetes (22.6%) | Outpatient                       | NR                                        | 0    | Supplemental oxygen, niv, iv (0.0%)                                  | sotrovimab (single 500 mg, 1-hour infusion)<br>placebo                                                                                                                                                                                                                                                                             | Mortality<br>Mechanical ventilation<br>Admission to hospital<br>Allergic reactions                       |

|                                      |                                                  |       |                                  |      |      |                                                                                                                             |           |                                            |      |                                                                                   |                                                                                                                                                                                                                                    |                                                                                                                                                                                                    |
|--------------------------------------|--------------------------------------------------|-------|----------------------------------|------|------|-----------------------------------------------------------------------------------------------------------------------------|-----------|--------------------------------------------|------|-----------------------------------------------------------------------------------|------------------------------------------------------------------------------------------------------------------------------------------------------------------------------------------------------------------------------------|----------------------------------------------------------------------------------------------------------------------------------------------------------------------------------------------------|
| Hamdy Salman, 2020 <sup>24</sup>     | Published<br>NCT04530370                         | 30    | Egypt                            | 57.5 | 70   | Bronchial asthma (16.7%)<br>Cerebrovascular disease (43.3%)<br>Diabetes (30.0%)                                             | Inpatient | Severe (100%)                              | 0    | Oxygen therapy (100.0%)<br>Iv (0.0%)<br>Ecmo (0.0%)                               | convalescent plasma (250 mL single dose)<br>standard care                                                                                                                                                                          | Mechanical ventilation<br>Viral clearance<br>TRALI<br>TACO<br>Allergic reactions                                                                                                                   |
| Horby_1, 2021 RECOVERY <sup>25</sup> | Published<br>NCT04381936                         | 11558 | United Kingdom                   | 63.5 | 64.3 | Chronic lung disease (23.5%)<br>Tuberculosis (0.4%)<br>Heart disease (22.3%)<br>Diabetes (26.9%)                            | Inpatient | NR                                         | 92.2 | Supplemental oxygen and/or high-flow (86.9%)<br>Iv (5.3%)                         | convalescent plasma (275 mL ± 75 mL given twice intravenously, the first as soon as possible after randomisation and the second (from a different donor) the following day and at least 12 hours after the first)<br>standard care | Mortality<br>Mechanical ventilation<br>Allergic reactions<br>Duration of hospitalization                                                                                                           |
| Horby_2, 2021 RECOVERY <sup>26</sup> | Pre-print<br>NCT04381936                         | 9785  | United Kingdom, Indonesia, Nepal | 61.9 | 62.6 | Chronic lung disease (22.9%)<br>Tuberculosis (0.3%)<br>Heart disease (21.4%)<br>Diabetes (26.3%)                            | Inpatient | NR                                         | 32.2 | Supplementary oxygen (61.3%)<br>Niv (26.2%)<br>Niv (6.0%)                         | casirivimab, imdevimab (4 g each, single dose)<br>standard care                                                                                                                                                                    | Mortality<br>Mechanical ventilation<br>Allergic reactions<br>Duration of hospitalization                                                                                                           |
| Korper, 2021 CAPSID <sup>27</sup>    | Pre-print<br>NCT04433910, EudraCT 2020-001310-38 | 105   | Germany                          | 60   | 73.3 | Copd, asthma, other pulmonary disease (16.2%)<br>Cardiovascular disease (21.9%)<br>Diabetes (31.4%)<br>Hypertension (56.2%) | Inpatient | Severe (100%)                              | 93.4 | Supplemental oxygen or niv (59.1%)<br>Iv (34.3%)                                  | convalescent plasma (one unit of 250 to 325 mL on day 1, 3 and 5)<br>standard care                                                                                                                                                 | Mortality<br>Adverse effects leading to discontinuation<br>Viral clearance<br>Duration of hospitalization<br>ICU length of stay<br>Time to symptom/clinical improvement<br>Time to viral clearance |
| Lanzoni, 2020 <sup>28</sup>          | Published<br>NCT04355728                         | 24    | United States                    | 58.7 | 54.2 | Heart disease (12.5%)<br>Diabetes (45.8%)<br>Hypertension (66.7%)                                                           | Inpatient | Severe (100%)<br>Severe: Critical (100.0%) | 45.8 | High-flow, cpap, or bipap (54.2%)<br>Iv, (45.8%)                                  | umbilical cord mesenchymal stem cells (two intravenous infusions of 100±20 x10 <sup>6</sup> cells, at 24 hours from randomization and the second 72±6 hours thereafter; 50 mL infused intravenously over 10±5 mins)<br>placebo     | Mortality<br>Time to symptom/clinical improvement                                                                                                                                                  |
| Li, 2020 <sup>29</sup>               | Published<br>ChiCTR2000029757                    | 103   | China                            | 70   | 58.3 | Cardiovascular disease (25.2%)<br>Cerebrovascular disease (17.5%)<br>Severe congestive heart failure (0.0%)<br>Diabetes     | Inpatient | Severe (100%)<br>Severe: Critical (56.3%)  | 68.3 | Supplemental oxygen (29.7%)<br>High-flow and/or niv (43.6%)<br>Iv or ecmo (24.8%) | convalescent plasma (4 to 13 mL/kg of recipient body weight; 10 mL for the first 15 minutes, which was then increased to approximately 100 mL per hour with close monitoring)<br>standard care                                     | Mortality<br>Allergic reactions<br>Duration of hospitalization<br>Time to symptom/clinical improvement                                                                                             |

|                                                                    |                          |     |                                                |      |      |                                                                                                                                                                                                                                                       |            |                                               |      |                                                                                           |                                                                                                                                  |                                                                                                                                                                                                                       |
|--------------------------------------------------------------------|--------------------------|-----|------------------------------------------------|------|------|-------------------------------------------------------------------------------------------------------------------------------------------------------------------------------------------------------------------------------------------------------|------------|-----------------------------------------------|------|-------------------------------------------------------------------------------------------|----------------------------------------------------------------------------------------------------------------------------------|-----------------------------------------------------------------------------------------------------------------------------------------------------------------------------------------------------------------------|
|                                                                    |                          |     |                                                |      |      | (20.4%)<br>Hypertension<br>(54.4%)                                                                                                                                                                                                                    |            |                                               |      |                                                                                           |                                                                                                                                  |                                                                                                                                                                                                                       |
| Libster,<br>2020<br>Fundacion<br>INFANT-<br>COVID-19 <sup>30</sup> | Published<br>NCT04479163 | 160 | Argentina                                      | 77.2 | 37.5 | Copd (4.4%)<br>Asthma or<br>other<br>respiratory<br>disease (3.8%)<br>Cardiovascular<br>disease (13.2%)<br>Diabetes<br>(22.6%)<br>Hypertension<br>(71.2%)                                                                                             | Outpatient | Mild/Moderate<br>(100.0%)                     | 0    | Supplemental oxygen<br>or<br>mechanical<br>ventilation<br>(0.0%)                          | convalescent plasma (250 mL<br>over 1.5 to 2 hours)<br>placebo                                                                   | Mortality<br>Mechanical ventilation<br>TACO<br>Allergic reactions                                                                                                                                                     |
| Lopardo,<br>2021 <sup>31</sup>                                     | Published<br>NCT04494984 | 245 | Argentina                                      | 54   | 65.2 | Lung disease<br>(10.4%)<br>Cardiovascular<br>disease (44.8%)<br>Diabetes<br>(23.7%)<br>Hypertension<br>(32.8%)                                                                                                                                        | Inpatient  | Mild/Moderate<br>(61.0%)<br>Severe<br>(39.0%) | 2.9  | Supplemental oxygen<br>(51.9%)<br>Niv or high-<br>flow (2.9%)<br>Iv (0.0%)                | purified equine anti-RBD<br>F(ab') <sub>2</sub> fragments (INM005)<br>(two doses of 4 mg/kg<br>separated by 48 hours)<br>placebo | Mortality<br>Adverse effects leading<br>to discontinuation<br>ICU length of stay<br>Duration of ventilation<br>Mechanical ventilation<br>Duration of<br>hospitalization<br>Time to<br>symptom/clinical<br>improvement |
| Lundgren,<br>2020<br>ACTIV-<br>3/TICO <sup>32</sup>                | Published<br>NCT04501978 | 326 | United<br>States,<br>Denmark<br>,<br>Singapore | 61   | 56.4 | Asthma (8.9%)<br>Copd (5.7%)<br>Mi or acute<br>coronary<br>syndrome<br>(3.2%)<br>Heart failure<br>(4.1%)<br>Cerebrovascular<br>disease (1.3%)<br>Diabetes<br>requiring<br>medication<br>(28.7%)<br>Hypertension<br>requiring<br>medication<br>(49.0%) | Inpatient  | Severe<br>(100%)                              | 15.3 | Supplemental oxygen<br>(57.3%)<br>High-flow<br>or niv<br>(15.3%)<br>Iv or ecmo,<br>(0.0%) | bamlanivimab (LY-CoV555,<br>7000 mg single intravenous<br>infusion over 1 hour)<br>placebo                                       | Mortality<br>Mechanical ventilation<br>Allergic reactions<br>Duration of<br>hospitalization                                                                                                                           |

|                                 |                                   |     |                                 |      |      |                                                                                                                 |            |                                            |      |                                                                                                                     |                                                                                               |                                                                                                                                                                                                                                                         |
|---------------------------------|-----------------------------------|-----|---------------------------------|------|------|-----------------------------------------------------------------------------------------------------------------|------------|--------------------------------------------|------|---------------------------------------------------------------------------------------------------------------------|-----------------------------------------------------------------------------------------------|---------------------------------------------------------------------------------------------------------------------------------------------------------------------------------------------------------------------------------------------------------|
| O'Brien_1, 2021 <sup>33</sup>   | Pre-print<br>NCT04452318          | 311 | United States, Romania, Moldova | 40.9 | 45.4 | Diabetes (7.7%)                                                                                                 | Outpatient | Mild/moderate (100%)                       | 0    | Supplementary oxygen, Niv, Iv (0%)                                                                                  | casirivimab, imdevimab (1200 mg each, single infusion) placebo                                | Mortality<br>Admission to hospital<br>Allergic reactions<br>Time to symptom/clinical improvement                                                                                                                                                        |
| O'Donnell, 2021 <sup>34</sup>   | Published<br>NCT04359810          | 223 | United States, Brazil           | 61   | 65.9 | Chronic pulmonary disease (9.0%)<br>Chronic cardiac disease (37.7%)<br>Diabetes (36.8%)<br>Hypertension (33.6%) | Inpatient  | Severe (100%)                              | 37.2 | Supplemental oxygen (56.5%)<br>High-flow or noninvasive ventilation (24.7%)<br>Invasive ventilation or ecmo (12.6%) | convalescent plasma (1 unit single transfusion)<br>control plasma (1 unit single transfusion) | Mortality<br>Mechanical ventilation<br>TACO<br>Allergic reactions<br>Duration of hospitalization<br>Time to symptom/clinical improvement                                                                                                                |
| Pouladzadeh, 2021 <sup>35</sup> | Published<br>IRCT20200310046736N1 | 62  | Iran                            | 55.4 | 55   | NR                                                                                                              | Inpatient  | Severe (100%)                              | NR   | NR                                                                                                                  | convalescent plasma (500 mL with possible second dose 24h apart)<br>standard care             | Mortality<br>Mechanical ventilation<br>Duration of hospitalization                                                                                                                                                                                      |
| Raman, 2021 <sup>36</sup>       | Published<br>CTRI/2020/06/026222  | 100 | India                           | 48.7 | 33   | Diabetes (27.0%)<br>Hypertension (31.0%)                                                                        | Inpatient  | Mild/Moderate (100.0%)                     | 0    | Mechanical ventilation (0.0%)                                                                                       | intravenous immunoglobulin (0.4 g/kg body weight for 5 days)<br>standard care                 | Mortality<br>Adverse effects leading to discontinuation<br>Viral clearance<br>Duration of hospitalization<br>ICU length of stay<br>Duration of ventilation<br>Time to symptom/clinical improvement<br>Time to viral clearance<br>Mechanical ventilation |
| Ray, 2020 <sup>37</sup>         | Pre-print<br>CTRI/2020/05/025209  | 80  | India                           | 61.4 | 71.2 | NR                                                                                                              | Inpatient  | Severe (100%)<br>Severe: Critical (100.0%) | 0    | Mechanical ventilation (0.0%)                                                                                       | convalescent plasma (200 mL given twice over 2 days)<br>standard care                         | Mortality<br>Duration of hospitalization                                                                                                                                                                                                                |

|                                           |                               |     |               |      |      |                                                                                                                                      |                                  |                                           |      |                                                                                                           |                                                                                                                                                                                       |                                                                                                                                                                                         |
|-------------------------------------------|-------------------------------|-----|---------------|------|------|--------------------------------------------------------------------------------------------------------------------------------------|----------------------------------|-------------------------------------------|------|-----------------------------------------------------------------------------------------------------------|---------------------------------------------------------------------------------------------------------------------------------------------------------------------------------------|-----------------------------------------------------------------------------------------------------------------------------------------------------------------------------------------|
| Sakoulas, 2020 <sup>38</sup>              | Published<br>NCT04411667      | 34  | United States | 54   | 60.6 | Asthma/copd (12.1%)<br>Coronary artery disease (6.1%)<br>Congestive heart failure (6.1%)<br>Diabetes (36.4%)<br>Hypertension (33.3%) | Inpatient Intensive care (12.1%) | NR                                        | 0    | Mechanical ventilation (0.0%)                                                                             | intravenous immunoglobulin (0.5 g/kg daily for 3 days)<br>standard care                                                                                                               | Mortality<br>Mechanical ventilation<br>Adverse effects leading to discontinuation<br>Allergic reactions<br>Duration of hospitalization<br>ICU length of stay<br>Duration of ventilation |
| Sekine, 2021<br>PLACOVID <sup>39</sup>    | Published<br>NCT04547660      | 160 | Brazil        | 60.5 | 58.1 | Chronic pulmonary disease (13.8%)<br>Cardiovascular disease (21.9%)<br>Diabetes (39.4%)<br>Hypertension (61.2%)                      | Inpatient Intensive care (66.3%) | Severe (100%)<br>Severe: Critical (66.3%) | 75   | Supplemental oxygen (32.5%)<br>High-flow or niv (32.5%)<br>lv or ecmo (42.5%)                             | convalescent plasma (300 mL given twice 48 hours apart)<br>standard care                                                                                                              | Mortality<br>Mechanical ventilation<br>Viral clearance<br>Allergic reactions<br>Duration of hospitalization<br>Ventilator-free days                                                     |
| Shi, 2020 <sup>40</sup>                   | Pre-print<br>NCT04288102      | 101 | China         | 60.5 | 56   | Chronic bronchitis (5.0%)<br>Copd (2.0%)<br>Diabetes (17.0%)<br>Hypertension (27.0%)                                                 | Inpatient                        | Severe (100%)                             | 1    | Supplemental oxygen (75.0%)<br>High-flow or niv (1.0%)<br>lv (0.0%)                                       | umbilical cord mesenchymal stem cells (4 x 10 <sup>7</sup> cells given on days 0, 3, and 6)<br>placebo                                                                                | Mortality<br>Mechanical ventilation                                                                                                                                                     |
| Shu, 2020 <sup>41</sup>                   | Published<br>ChiCTR2000031494 | 41  | China         | 58.8 | 58.5 | Diabetes (19.5%)<br>Hypertension (21.9%)                                                                                             | Inpatient                        | Severe (100%)                             | 24.4 | High-flow or niv (24.4%)<br>lv or ecmo (0.0%)                                                             | umbilical cord mesenchymal stem cells (2 x 10 <sup>6</sup> cells/kg given intravenously over 1 h)<br>standard care                                                                    | Mortality<br>Mechanical ventilation<br>TRALI<br>TACO<br>Allergic reactions<br>Duration of hospitalization<br>Time to symptom/clinical improvement                                       |
| Simonovich, 2020<br>PlasmAr <sup>42</sup> | Published<br>NCT04383535      | 334 | Argentina     | 62.3 | 67.6 | Copd (7.5%)<br>Asthma (4.2%)<br>Congestive heart failure (3.3%)<br>Diabetes (18.3%)<br>Hypertension (47.8%)                          | Inpatient Intensive care (27.6%) | Severe (100%)                             | 5.4  | Low-flow nasal cannula (64.9%)<br>Venturi or nonrebreather mask (19.5%)<br>High-flow (5.4%)<br>Niv (0.0%) | convalescent plasma (5-10 mL/kg, with an inferior limit around 400 mL for patients whose body weight was below 70 kg and a superior limit of 600 mL for those above 70 kg)<br>placebo | Mortality<br>Mechanical ventilation<br>TRALI<br>TACO<br>Allergic reactions<br>Duration of hospitalization<br>ICU length of stay<br>Time to symptom/clinical improvement                 |

|                                           |                                        |      |                        |      |      |                                                                                                           |            |                  |      |                                                                                                                             |                                                                                                                                         |                                                                                                                                                                                                         |
|-------------------------------------------|----------------------------------------|------|------------------------|------|------|-----------------------------------------------------------------------------------------------------------|------------|------------------|------|-----------------------------------------------------------------------------------------------------------------------------|-----------------------------------------------------------------------------------------------------------------------------------------|---------------------------------------------------------------------------------------------------------------------------------------------------------------------------------------------------------|
| Tabarsi, 2020 <sup>43</sup>               | Published<br>IRCT2015122<br>7025726N20 | 84   | Iran                   | 53.6 | 77.4 | Copd (1.2%)<br>Ischemic heart<br>disease (6.0%)<br>Diabetes<br>(21.4%)<br>Hypertension<br>(20.2%)         | Inpatient  | Severe<br>(100%) | NR   | NR                                                                                                                          | intravenous immunoglobulin<br>(400 mg/kg daily for three<br>doses)<br>standard care                                                     | Mortality<br>Mechanical ventilation<br>Duration of<br>hospitalization<br>ICU length of stay                                                                                                             |
| Weinreich_2_1, 2021 <sup>44</sup>         | Pre-print<br>NCT04425629               | 3029 | United States          | 50   | 47.8 | NR                                                                                                        | Outpatient | NR               | NR   | NR                                                                                                                          | casirivimab, imdevimab (2400 mg each, single infusion)<br>placebo                                                                       | Mortality<br>Mechanical ventilation<br>Admission to hospital<br>Adverse effects leading to discontinuation<br>Allergic reactions<br>Duration of hospitalization<br>Time to symptom/clinical improvement |
| Weinreich_2_2, 2021 <sup>44</sup>         | Pre-print<br>NCT04425629               | 1678 | United States          | 48.2 | 48.2 | NR                                                                                                        | Outpatient | NR               | NR   | NR                                                                                                                          | casirivimab, imdevimab (1200 mg each, single infusion)<br>placebo                                                                       | Mortality<br>Mechanical ventilation<br>Admission to hospital<br>Adverse effects leading to discontinuation<br>Allergic reactions<br>Duration of hospitalization<br>Time to symptom/clinical improvement |
| Weinreich_2_3, 2021 <sup>44</sup>         | Pre-print<br>NCT04425629               | 1360 | United States          | 50.5 | 49.7 | NR                                                                                                        | Outpatient | NR               | NR   | NR                                                                                                                          | casirivimab, imdevimab (8000 mg each, single infusion)<br>placebo                                                                       | Mortality<br>Admission to hospital<br>Adverse effects leading to discontinuation<br>Allergic reactions                                                                                                  |
| Weinreich_3, 2021 <sup>45</sup>           | Pre-print<br>NCT04425629               | 799  | United states, Romania | 42   | 47.1 | NR                                                                                                        | Outpatient | NR               | NR   | NR                                                                                                                          | casirivimab, imdevimab (2400 mg each, single infusion)<br>casirivimab, imdevimab (8000 mg each, single infusion)<br>placebo             | Mortality<br>Admission to hospital<br>Adverse effects leading to discontinuation<br>Allergic reactions                                                                                                  |
| Zambrano, 2020 SENTAD-COVID <sup>46</sup> | Pre-print<br>NCT04473170               | 139  | United Arab Emirates   | 45.1 | 92.8 | Respiratory condition (5.0%)<br>Cardiovascular disease (2.2%)<br>Diabetes (22.3%)<br>Hypertension (26.6%) | Inpatient  | NR               | 31.6 | Supplemental oxygen (13.7%)<br>High-flow or niv (6.5%)<br>Iv (3.6%)<br>Mechanical ventilation and additional organ support: | nebulized peripheral blood non-hematopoietic enriched stem cells (two nebulizations of 10 cc, in two consecutive days)<br>standard care | Mortality<br>Duration of hospitalization                                                                                                                                                                |

|  |  |  |  |  |  |  |  |  |  |                                     |  |  |
|--|--|--|--|--|--|--|--|--|--|-------------------------------------|--|--|
|  |  |  |  |  |  |  |  |  |  | ecmo, crrt,<br>vasopressors (21.6%) |  |  |
|--|--|--|--|--|--|--|--|--|--|-------------------------------------|--|--|

## References

1. Adas G, Cukurova Z, Yasar KK, et al. The Systematic Effect of Mesenchymal Stem Cell Therapy in Critical COVID-19 Patients: A Prospective Double Controlled Trial. *Cell Transplant* 2021;30:9636897211024942. doi: 10.1177/09636897211024942 [published Online First: 2021/06/29]
2. Agarwal A, Mukherjee A, Kumar G, et al. Convalescent plasma in the management of moderate covid-19 in adults in India: open label phase II multicentre randomised controlled trial (PLACID Trial). *BMJ* 2020;371:m3939. doi: 10.1136/bmj.m3939
3. AlQahtani M, Abdulrahman A, Almadani A, et al. Randomized controlled trial of convalescent plasma therapy against standard therapy in patients with severe COVID-19 disease. *Sci Rep* 2021;11(1):9927. doi: 10.1038/s41598-021-89444-5 [published Online First: 2021/05/13]
4. Ali S, Uddin SM, Shalim E, et al. Hyperimmune anti-COVID-19 IVIG (C-IVIG) treatment in severe and critical COVID-19 patients: A phase I/II randomized control trial. *EClinicalMedicine* 2021;36:100926. doi: 10.1016/j.eclinm.2021.100926 [published Online First: 2021/06/11]
5. Avendano-Sola C, Ramos-Martinez A, Munez-Rubio E, et al. Convalescent Plasma for COVID-19: A multicenter, randomized clinical trial (preprint). *medRxiv* 2020:2020.08.26.20182444. doi: 10.1101/2020.08.26.20182444
6. Bajpai M, Kumar S, Maheshwari A, et al. Efficacy of Convalescent Plasma Therapy compared to Fresh Frozen Plasma in Severely ill COVID-19 Patients: A Pilot Randomized Controlled Trial. *medRxiv* 2020:2020.10.25.20219337. doi: 10.1101/2020.10.25.20219337
7. Balcells ME, Rojas L, Le Corre N, et al. Early versus deferred anti-SARS-CoV-2 convalescent plasma in patients admitted for COVID-19: A randomized phase II clinical trial. *PLoS Med* 2021;18(3):e1003415. doi: 10.1371/journal.pmed.1003415 [published Online First: 2021/03/04]
8. Bandopadhyay P, D'Rozario R, Lahiri A, et al. Nature and dimensions of the cytokine storm and its attenuation by convalescent plasma in severe COVID-19. *medRxiv* 2020:2020.09.21.20199109. doi: 10.1101/2020.09.21.20199109
9. Bennett-Guerrero E, Romeiser JL, Talbot LR, et al. Severe Acute Respiratory Syndrome Coronavirus 2 Convalescent Plasma Versus Standard Plasma in Coronavirus Disease 2019 Infected Hospitalized Patients in New York: A Double-Blind Randomized Trial. *Crit Care Med* 2021;49(7):1015-25. doi: 10.1097/ccm.0000000000005066 [published Online First: 2021/04/20]
10. Group TC-S, committee C-w, Bégin P, et al. Convalescent plasma for hospitalized patients with COVID-19 and the effect of plasma antibodies: a randomized controlled, open-label trial. *medRxiv* 2021:2021.06.29.21259427. doi: 10.1101/2021.06.29.21259427
11. Yendry Ventura C, Fatima Mohammed A, Yandy Marx Castillo A, et al. Safety and Efficacy of Autologous Non- Hematopoietic Enriched Stem Cell Nebulization in Covid-19 Patients. A Randomized Clinical Trial, Abu Dhabi 2020. *Translational Medicine Communications* 2021 doi: 10.21203/rs.3.rs-558653/v1
12. Chen P, Nirula A, Heller B, et al. SARS-CoV-2 Neutralizing Antibody LY-CoV555 in Outpatients with Covid-19. *New England Journal of Medicine* 2020 doi: 10.1056/NEJMoa2029849
13. Chew K, Moser C, Daar E. SYMPTOM OUTCOME MEASURES FOR OUTPATIENT COVID-19 PHASE 3 TREATMENT TRIALS. *Conference on Retroviruses and Opportunistic Infections* 2021;Abstract
14. Dougan M, Nirula A, Azizad M, et al. Bamlanivimab plus Etesevimab in Mild or Moderate Covid-19. *New England Journal of Medicine* 2021 doi: 10.1056/NEJMoa2102685
15. Joong Sik E, Michael I, Anca S-C, et al. Efficacy and safety of CT-P59 plus standard of care: a phase 2/3 randomized, double-blind, placebo-controlled trial in outpatients with mild-to-moderate SARS-CoV-2 infection. *Research Square* 2021 doi: 10.21203/rs.3.rs-296518/v1
16. Investigators TR-C, Estcourt LJ. Convalescent Plasma in Critically ill Patients with Covid-19. *medRxiv* 2021:2021.06.11.21258760. doi: 10.1101/2021.06.11.21258760
17. Faqih F, Alharthy A, Abdulaziz S, et al. Therapeutic plasma exchange in patients with life-threatening COVID-19: a randomised controlled clinical trial. *Int J Antimicrob Agents* 2021;57(5):106334. doi: 10.1016/j.ijantimicag.2021.106334 [published Online First: 2021/04/11]



18. Gaborit B, Dailly E, Vanhove B, et al. Pharmacokinetics and safety of XAV-19, a swine glyco-humanized polyclonal anti-SARS-CoV-2 antibody, for COVID-19-related moderate pneumonia: a randomized, double-blind, placebo-controlled, phase IIa study. *Antimicrob Agents Chemother* 2021:Aac0123721. doi: 10.1128/aac.01237-21 [published Online First: 2021/06/29]
19. Gharbharan A, Jordans CCE, GeurtsvanKessel C, et al. Effects of potent neutralizing antibodies from convalescent plasma in patients hospitalized for severe SARS-CoV-2 infection. *Nat Commun* 2021;12(1):3189. doi: 10.1038/s41467-021-23469-2 [published Online First: 2021/05/29]
20. Gharebaghi N, Nejadrahim R, Mousavi SJ, et al. The use of intravenous immunoglobulin gamma for the treatment of severe coronavirus disease 2019: A randomised placebo-controlled double-blind clinical trial. *BMC Infectious Diseases* 2020
21. Gonzalez JLB, González Gámez M, Mendoza Enciso EA, et al. Efficacy and safety of convalescent plasma and intravenous immunoglobulin in critically ill COVID-19 patients. A controlled clinical trial. *medRxiv* 2021:2021.03.28.21254507. doi: 10.1101/2021.03.28.21254507
22. Gottlieb RL, Nirula A, Chen P, et al. Effect of Bamlanivimab as Monotherapy or in Combination With Etesevimab on Viral Load in Patients With Mild to Moderate COVID-19: A Randomized Clinical Trial. *JAMA* 2021;325(7):632-44. doi: 10.1001/jama.2021.0202
23. Gupta A, Gonzalez-Rojas Y, Juarez E, et al. Early Covid-19 Treatment With SARS-CoV-2 Neutralizing Antibody Sotrovimab. *medRxiv* 2021:2021.05.27.21257096. doi: 10.1101/2021.05.27.21257096
24. Ossama Hamdy Salman HSAM. Efficacy and safety of transfusing plasma from COVID-19 survivors to COVID-19 victims with severe illness. A double-blinded controlled preliminary study. *Egyptian Journal of Anaesthesia* 2020;36(1):264-72. doi: 10.1080/11101849.2020.1842087
25. Group RC. Convalescent plasma in patients admitted to hospital with COVID-19 (RECOVERY): a randomised controlled, open-label, platform trial. *Lancet* 2021;397(10289):2049-59. doi: 10.1016/s0140-6736(21)00897-7 [published Online First: 2021/05/18]
26. Group RC, Horby PW, Mafham M, et al. Casirivimab and imdevimab in patients admitted to hospital with COVID-19 (RECOVERY): a randomised, controlled, open-label, platform trial. *medRxiv* 2021:2021.06.15.21258542. doi: 10.1101/2021.06.15.21258542
27. Körper S, Weiss M, Zickler D, et al. High Dose Convalescent Plasma in COVID-19: Results from the Randomized Trial CAPSID. *medRxiv* 2021:2021.05.10.21256192. doi: 10.1101/2021.05.10.21256192
28. Lanzoni G, Linetsky E, Correa D, et al. Umbilical cord mesenchymal stem cells for COVID-19 acute respiratory distress syndrome: A double-blind, phase 1/2a, randomized controlled trial. *Stem Cells Transl Med* 2021;10(5):660-73. doi: 10.1002/sctm.20-0472 [published Online First: 2021/01/06]
29. Li L, Zhang W, Hu Y, et al. Effect of Convalescent Plasma Therapy on Time to Clinical Improvement in Patients With Severe and Life-threatening COVID-19: A Randomized Clinical Trial. *Jama* 2020 doi: 10.1001/jama.2020.10044
30. Libster R, Pérez Marc G, Wappner D, et al. Early High-Titer Plasma Therapy to Prevent Severe Covid-19 in Older Adults. *New England Journal of Medicine* 2021;384(7):610-18. doi: 10.1056/NEJMoa2033700
31. Lopardo G, Belloso WH, Nannini E, et al. RBD-specific polyclonal F(ab')<sub>2</sub> fragments of equine antibodies in patients with moderate to severe COVID-19 disease: A randomized, multicenter, double-blind, placebo-controlled, adaptive phase 2/3 clinical trial. *EClinicalMedicine* 2021;34:100843. doi: 10.1016/j.eclinm.2021.100843 [published Online First: 2021/04/20]
32. Group A-TL-CS. A Neutralizing Monoclonal Antibody for Hospitalized Patients with Covid-19. *New England Journal of Medicine* 2020;384(10):905-14. doi: 10.1056/NEJMoa2033130
33. O'Brien MP, Forleo-Neto E, Sarkar N, et al. Subcutaneous REGEN-COV Antibody Combination in Early SARS-CoV-2 Infection. *medRxiv* 2021:2021.06.14.21258569. doi: 10.1101/2021.06.14.21258569
34. O'Donnell MR, Grinsztejn B, Cummings MJ, et al. A randomized double-blind controlled trial of convalescent plasma in adults with severe COVID-19. *J Clin Invest* 2021;131(13) doi: 10.1172/jci150646 [published Online First: 2021/05/12]
35. Pouladzadeh M, Safdarian M, Eshghi P, et al. A randomized clinical trial evaluating the immunomodulatory effect of convalescent plasma on COVID-19-related cytokine storm. *Intern Emerg Med* 2021:1-11. doi: 10.1007/s11739-021-02734-8 [published Online First: 2021/04/11]

36. Raman RS, Bhagwan Barge V, Anil Kumar D, et al. A Phase II Safety and Efficacy Study on Prognosis of Moderate Pneumonia in Coronavirus Disease 2019 Patients With Regular Intravenous Immunoglobulin Therapy. *J Infect Dis* 2021;223(9):1538-43. doi: 10.1093/infdis/jiab098 [published Online First: 2021/02/16]
37. Ray Y, Paul SR, Bandopadhyay P, et al. Clinical and immunological benefits of convalescent plasma therapy in severe COVID-19: insights from a single center open label randomised control trial. *medRxiv* 2020:2020.11.25.20237883. doi: 10.1101/2020.11.25.20237883
38. Sakoulas G, Geriak M, Kullar R, et al. Intravenous Immunoglobulin Plus Methylprednisolone Mitigate Respiratory Morbidity in Coronavirus Disease 2019. *Critical Care Explorations* 2020;2(11):e0280. doi: 10.1097/cce.0000000000000280
39. Sekine L, Arns B, Fabro BR, et al. Convalescent plasma for COVID-19 in hospitalised patients: an open-label, randomised clinical trial. *Eur Respir J* 2021 doi: 10.1183/13993003.01471-2021 [published Online First: 2021/07/11]
40. Shi L, Huang H, Lu X, et al. Effect of human umbilical cord-derived mesenchymal stem cells on lung damage in severe COVID-19 patients: a randomized, double-blind, placebo-controlled phase 2 trial. *Signal Transduction and Targeted Therapy* 2021;6(1):58. doi: 10.1038/s41392-021-00488-5
41. Shu L, Niu C, Li R, et al. Treatment of severe COVID-19 with human umbilical cord mesenchymal stem cells. *Stem cell research & therapy* 2020;11(1):361. doi: 10.1186/s13287-020-01875-5
42. Simonovich VA, Burgos Pratz LD, Scibona P, et al. A Randomized Trial of Convalescent Plasma in Covid-19 Severe Pneumonia. *New England Journal of Medicine* 2020;384(7):619-29. doi: 10.1056/NEJMoa2031304
43. Tabarsi P, Barati S, Jamaati H, et al. Evaluating the effects of Intravenous Immunoglobulin (IVIg) on the management of severe COVID-19 cases: A randomized controlled trial. *International Immunopharmacology* 2020 doi: <https://doi.org/10.1016/j.intimp.2020.107205>
44. Weinreich DM, Sivapalasingam S, Norton T, et al. REGEN-COV Antibody Cocktail Clinical Outcomes Study in Covid-19 Outpatients. *medRxiv* 2021:2021.05.19.21257469. doi: 10.1101/2021.05.19.21257469
45. Weinreich DM, Sivapalasingam S, Norton T, et al. REGEN-COV Antibody Cocktail in Outpatients with Covid-19. *medRxiv* 2021:2021.06.09.21257915. doi: 10.1101/2021.06.09.21257915
46. Torres Zambrano GM, Rivero RA, Villegas Valverde CA, et al. Features and outcomes of secondary sepsis and urinary tract infections in COVID-19 patients treated with stem cell nebulization. *medRxiv* 2020:2020.12.05.20244483. doi: 10.1101/2020.12.05.20244483

Characteristics of convalescent plasma and intravenous immunoglobulin treatment

| Ref ID       | 1st Author    | Convalescent plasma characteristics                                                                                                                                                                                                                                                                                                                                                                                                                                                                                                                                                                                                                                                                                             |                                              |                          |                 |                                      |                                                                            |                                                                         | Intravenous Immunoglobulin (IVIG) characteristics |
|--------------|---------------|---------------------------------------------------------------------------------------------------------------------------------------------------------------------------------------------------------------------------------------------------------------------------------------------------------------------------------------------------------------------------------------------------------------------------------------------------------------------------------------------------------------------------------------------------------------------------------------------------------------------------------------------------------------------------------------------------------------------------------|----------------------------------------------|--------------------------|-----------------|--------------------------------------|----------------------------------------------------------------------------|-------------------------------------------------------------------------|---------------------------------------------------|
|              |               | Donor eligibility                                                                                                                                                                                                                                                                                                                                                                                                                                                                                                                                                                                                                                                                                                               | Antibody titer cut-off for donor eligibility | Antibody titer of donors | Male donors (%) | Donors hospitalized for COVID-19 (%) | Volume of plasma transfused (mL/kg or mL; specify the units in this field) | Days since onset of symptoms at point of randomization /plasma infusion | IVIG Product                                      |
| 12415, 16657 | Agarwal       | Eligible donors were either males or nulliparous females aged between 18-65 years, weighing over 50 kg, who had received a diagnosis of COVID-19 confirmed with a positive RT-PCR test, suffered from symptomatic COVID-19 with at least fever and cough, which had completely resolved for a period of 28 consecutive days prior to donation or a period of 14 days prior to donation with two negative SARS-CoV-2 RT-PCR tests from nasopharyngeal swabs collected 24 hours apart                                                                                                                                                                                                                                             | NR                                           | 1:40                     | 94.3            | NR                                   | 2 doses of 200 mL                                                          | 8                                                                       | NA                                                |
| 17545        | AlQahtani     | Patients who had recovered from COVID-19 and had been discharged from hospital for more than 2 102 weeks were approached to be volunteer donors. The criteria for donors included (1) ability to give 103 informed consent; (2) men or nulliparous women (all women had a pregnancy test except for 104 postmenopausal women); (3) PCR COVID-19 negative from respiratory tract; (4) patients were 105 symptom free; (5) patients above the ages of 21; (6) body weight more than 50kg; (7) met all donor 106 selection criteria employed for routine plasma collection and plasmapheresis procedures at the 107 collection centre. Convalescent plasma collection was performed followed by plasma extraction as 108 detailed. | NR                                           | NR                       | NR              | 100                                  | 2 doses of 200 mL                                                          | NR                                                                      | NA                                                |
| 11970        | Avendano-Sola | CP donors complied with EU requirements for plasma donors <sup>8</sup> , had laboratory confirmed SARSCoV- 2 infection,                                                                                                                                                                                                                                                                                                                                                                                                                                                                                                                                                                                                         | 1:80                                         | 1:292                    | 88.46           | NR                                   | 250 to 300 mL                                                              | 8                                                                       | NA                                                |

| Ref ID | 1st Author   | Convalescent plasma characteristics                                                                                                                                                                                                                                                                                                                                                                                                                                                                                                                                                                          |                                              |                          |                 |                                      |                                                                            |                                                                         | Intravenous Immunoglobulin (IVIG) characteristics |
|--------|--------------|--------------------------------------------------------------------------------------------------------------------------------------------------------------------------------------------------------------------------------------------------------------------------------------------------------------------------------------------------------------------------------------------------------------------------------------------------------------------------------------------------------------------------------------------------------------------------------------------------------------|----------------------------------------------|--------------------------|-----------------|--------------------------------------|----------------------------------------------------------------------------|-------------------------------------------------------------------------|---------------------------------------------------|
|        |              | Donor eligibility                                                                                                                                                                                                                                                                                                                                                                                                                                                                                                                                                                                            | Antibody titer cut-off for donor eligibility | Antibody titer of donors | Male donors (%) | Donors hospitalized for COVID-19 (%) | Volume of plasma transfused (mL/kg or mL; specify the units in this field) | Days since onset of symptoms at point of randomization /plasma infusion | IVIG Product                                      |
|        |              | anti-SARS-CoV-2 IgG (ratio $\geq 1.1$ with the Euroimmun ELISA test; Euroimmun, Lübeck, Germany) and were asymptomatic for at least 14 days.                                                                                                                                                                                                                                                                                                                                                                                                                                                                 |                                              |                          |                 |                                      |                                                                            |                                                                         |                                                   |
| 16521  | Bajpai       | We collected 500ml Convalescent plasma (COPLA) from COVID-19 recovered patients after 14 days of complete resolution of symptoms by Plasmapheresis (MCS+, Hemonetics USA) after due consent. Two consecutive test negative results of Real-time reverse transcriptase Polymerase chain reaction (RT-PCR) were done 24 hours apart from combined oral and nasopharyngeal swab for SARS CoV-2 for donation consideration. Final eligibility was ascertained thorough medical history, physical examination and laboratory tests, as per the Drugs and Cosmetics Act, 1940 and further amended on 11.03.2020.10 | $\geq 1:80$                                  | 1:80                     | 100             | NR                                   | 2 doses of 250 mL                                                          | <3                                                                      | NA                                                |
| 13304  | Balcells     | Plasma was obtained from volunteer subjects who had recovered from COVID-19, having been asymptomatic for at least 28 days, with a negative SARS-CoV-2 RT-PCR both in nasopharyngeal swab and in plasma, and anti-SARS-CoV-2 (S1) IgG titers <sup>3</sup> 1:400 (ELISA Euroimmun®). Donor plasma was tested for standard infectious diseases before administration and extracted plasma was immediately frozen at -20°C according to standard national safety measures[19].                                                                                                                                  | 1:400                                        | NR                       | NR              | NR                                   | 2 doses of 200 mL                                                          | 5.52                                                                    | NA                                                |
| 10     | Bandopadhyay | Plasma was collected from convalescent donors (recovered from RT-PCR positive SARS-CoV-2 infection at least 28 days prior to donation) by apheresis at the                                                                                                                                                                                                                                                                                                                                                                                                                                                   | NR                                           | NR                       | NR              | NR                                   | 2 doses of 200 mL                                                          | NR                                                                      | NA                                                |

| Ref ID | 1st Author | Convalescent plasma characteristics                                                                                                                                                                                                                                                                                                                                                                                                                                                                                                                                                                                                                                                                                                                                                                                                                                                                                                                                                                                                                                                                                        |                                              |                          |                 |                                      |                                                                            |                                                                         | Intravenous Immunoglobulin (IVIG) characteristics |
|--------|------------|----------------------------------------------------------------------------------------------------------------------------------------------------------------------------------------------------------------------------------------------------------------------------------------------------------------------------------------------------------------------------------------------------------------------------------------------------------------------------------------------------------------------------------------------------------------------------------------------------------------------------------------------------------------------------------------------------------------------------------------------------------------------------------------------------------------------------------------------------------------------------------------------------------------------------------------------------------------------------------------------------------------------------------------------------------------------------------------------------------------------------|----------------------------------------------|--------------------------|-----------------|--------------------------------------|----------------------------------------------------------------------------|-------------------------------------------------------------------------|---------------------------------------------------|
|        |            | Donor eligibility                                                                                                                                                                                                                                                                                                                                                                                                                                                                                                                                                                                                                                                                                                                                                                                                                                                                                                                                                                                                                                                                                                          | Antibody titer cut-off for donor eligibility | Antibody titer of donors | Male donors (%) | Donors hospitalized for COVID-19 (%) | Volume of plasma transfused (mL/kg or mL; specify the units in this field) | Days since onset of symptoms at point of randomization /plasma infusion | IVIG Product                                      |
|        |            | Department of Blood Transfusion and Immunohematology, Medical College Hospital, Kolkata, India. All donors were tested for their All rights reserved. No reuse allowed without permission. preprint (which was not certified by peer review) is the author/funder, who has granted medRxiv a license to display the preprint in perpetuity. medRxiv preprint doi: <a href="https://doi.org/10.1101/2020.09.21.20199109">https://doi.org/10.1101/2020.09.21.20199109</a> .this version posted September 23, 2020. The copyright holder for this anti-Spike IgG content in addition to routine screening tests to exclude major blood borne pathogens before apheresis. As per our trial protocol (Clinical Trial Registry of India No. CTRI/2020/05/025209), approved by Central Drugs Standard Control Organisation (CDSCO) India, we randomized the ARDS patients into either standard-of-care (SOC) group as controls or added two consecutive doses of ABO-matched 200ml convalescent plasma on two consecutive days to their standard care (CPT group), the first transfusion being on the day of recruitment (Day 1). |                                              |                          |                 |                                      |                                                                            |                                                                         |                                                   |
| 17102  | Chen_6     | NA                                                                                                                                                                                                                                                                                                                                                                                                                                                                                                                                                                                                                                                                                                                                                                                                                                                                                                                                                                                                                                                                                                                         | NA                                           | NA                       | NA              | NA                                   | NA                                                                         | NA                                                                      | NA                                                |
| 7688   | Gharbharan | ConvP donors were recruited and screened by Sanquin Blood Supply (the Dutch blood bank) according to existing guidelines. They needed to have had a RT-PCR confirmed SARS-CoV-2 infection and be asymptomatic for at least 14 days. Of all donors tested, only plasma with anti- SARS-CoV-2 neutralizing antibodies confirmed by a SARS-COV-2                                                                                                                                                                                                                                                                                                                                                                                                                                                                                                                                                                                                                                                                                                                                                                              | 1:80                                         | 1:640                    | 100             | NR                                   | 300 mL                                                                     | 10                                                                      | NA                                                |

| Ref ID      | 1st Author | Convalescent plasma characteristics                                                                                                                                                                                                                                                                                                                                                                                                                                                                                                                                                                                                                                                                                                                                                                                                                                                                                                                                                                             |                                              |                          |                 |                                      |                                                                            |                                                                         | Intravenous Immunoglobulin (IVIG) characteristics |
|-------------|------------|-----------------------------------------------------------------------------------------------------------------------------------------------------------------------------------------------------------------------------------------------------------------------------------------------------------------------------------------------------------------------------------------------------------------------------------------------------------------------------------------------------------------------------------------------------------------------------------------------------------------------------------------------------------------------------------------------------------------------------------------------------------------------------------------------------------------------------------------------------------------------------------------------------------------------------------------------------------------------------------------------------------------|----------------------------------------------|--------------------------|-----------------|--------------------------------------|----------------------------------------------------------------------------|-------------------------------------------------------------------------|---------------------------------------------------|
|             |            | Donor eligibility                                                                                                                                                                                                                                                                                                                                                                                                                                                                                                                                                                                                                                                                                                                                                                                                                                                                                                                                                                                               | Antibody titer cut-off for donor eligibility | Antibody titer of donors | Male donors (%) | Donors hospitalized for COVID-19 (%) | Volume of plasma transfused (mL/kg or mL; specify the units in this field) | Days since onset of symptoms at point of randomization /plasma infusion | IVIG Product                                      |
|             |            | plaque reduction neutralization test (PRNT) and a PRNT50 titer of at least 1:80 was used. <sup>11</sup> Furthermore, for each patient, we selected the plasma with the highest PRNT50 titer from the ABO compatible donor pool available at the time of inclusion.                                                                                                                                                                                                                                                                                                                                                                                                                                                                                                                                                                                                                                                                                                                                              |                                              |                          |                 |                                      |                                                                            |                                                                         |                                                   |
| 3, 4, 16306 | Gharebaghi | NA                                                                                                                                                                                                                                                                                                                                                                                                                                                                                                                                                                                                                                                                                                                                                                                                                                                                                                                                                                                                              | NA                                           | NA                       | NA              | NA                                   | NA                                                                         | NA                                                                      | Flebogamma DIF                                    |
| Lanzoni     | Lanzoni    | NA                                                                                                                                                                                                                                                                                                                                                                                                                                                                                                                                                                                                                                                                                                                                                                                                                                                                                                                                                                                                              | NA                                           | NA                       | NA              | NA                                   | NA                                                                         | NA                                                                      | NA                                                |
| 5833, 12417 | Li         | In brief, patients with a laboratory-confirmed COVID-19 diagnosis, who had fully recovered and been discharged from the hospital for more than 2 weeks, were recruited. Convalescent plasma-specific donor screening and selection were based on the following criteria: age of 18 through 55 years, suitable for blood donation, initially diagnosed with COVID-19 but with 2 negative PCR test results from nasopharyngeal swabs (at least 24 hours apart) prior to hospital discharge, discharged for more than 2 weeks from the hospital, and no persisting COVID-19 symptoms. Convalescent plasma collection was performed based on routine plasma collection procedures via plasmapheresis. The plasma products were prepared as fresh-frozen plasma. COVID-19 convalescent plasma was collected and processed at the Wuhan Blood Center. S-RBD-specific IgG antibody titer was measured for convalescent plasma products and reported as the following: less than 1:160, 1:160, 1:320, 1:640, 1:1280, or | 1: 160 with a volume of 100-600 ml           | NR                       | NR              | 100                                  | 4 to 13                                                                    | 28.49                                                                   | NA                                                |

| Ref ID  | 1st Author | Convalescent plasma characteristics                                                                                                                                                                                                                                                                                                                                                                                                                                                                                                                                                                                                                                                               |                                              |                          |                 |                                      |                                                                            |                                                                         | Intravenous Immunoglobulin (IVIG) characteristics |
|---------|------------|---------------------------------------------------------------------------------------------------------------------------------------------------------------------------------------------------------------------------------------------------------------------------------------------------------------------------------------------------------------------------------------------------------------------------------------------------------------------------------------------------------------------------------------------------------------------------------------------------------------------------------------------------------------------------------------------------|----------------------------------------------|--------------------------|-----------------|--------------------------------------|----------------------------------------------------------------------------|-------------------------------------------------------------------------|---------------------------------------------------|
|         |            | Donor eligibility                                                                                                                                                                                                                                                                                                                                                                                                                                                                                                                                                                                                                                                                                 | Antibody titer cut-off for donor eligibility | Antibody titer of donors | Male donors (%) | Donors hospitalized for COVID-19 (%) | Volume of plasma transfused (mL/kg or mL; specify the units in this field) | Days since onset of symptoms at point of randomization /plasma infusion | IVIG Product                                      |
|         |            | greater than 1:1280. There was a positive correlation between the SARS-CoV-2 viral neutralization titer and the S-RBD-specific IgG titer ( $r = 0.622$ , $P = .03$ ). A serum neutralization titer of 1:80 is approximately equivalent to a titer of 1:1280 for S-RBD-specific IgG. To ensure the therapeutic potency of the convalescent plasma, only the plasma units with an S-RBD-specific IgG titer of at least 1:640 were used for this study. Additional details regarding plasma preparation standards can be found in the eMethods in Supplement 3, and the preparation requirements of convalescent plasma used were similar to the recently updated FDA recommendations. <sup>10</sup> |                                              |                          |                 |                                      |                                                                            |                                                                         |                                                   |
| Libster | Libster    | 479 volunteers infected with SARS-CoV2 for a minimum of 10 days, asymptomatic for $\geq 3$ days, and with two negative RT-PCR tests [14] were identified through hospital lists and an online campaign. Candidates were visited at home and screened for SARS-CoV2 S IgG titers $>1:1,000$ in serum. 135 (28.2%) were invited to donate 750 ml of plasma at four hemotherapy centers in Buenos Aires (Suppl. Material).                                                                                                                                                                                                                                                                           | 1:1000                                       | 1:3200                   | NR              | NR                                   | 250 mL                                                                     | 1.62                                                                    | NA                                                |
| 21005   | Ray        | The inclusion criteria for donors were: age $> 18$ years, males or nulliparous female convalescent volunteers with history of being positive for SARS-CoV2 on RT-PCR, having weight $> 55$ Kg, complete resolution of symptoms at least 28 days prior to donation, and a negative RT-PCR test for SARS-CoV2 before plasma donation. Consenting convalescent patients not fit to donate blood based on the                                                                                                                                                                                                                                                                                         | NR                                           | NR                       | 80.33           | NR                                   | 2 doses of 200 mL                                                          | NR                                                                      | NA                                                |

| Ref ID      | 1st Author | Convalescent plasma characteristics                                                                                                                                                                                                                                                                                                                                                                                                                                                                                                                                                                                                       |                                              |                          |                 |                                      |                                                                                                                                   |                                                                         | Intravenous Immunoglobulin (IVIG) characteristics |
|-------------|------------|-------------------------------------------------------------------------------------------------------------------------------------------------------------------------------------------------------------------------------------------------------------------------------------------------------------------------------------------------------------------------------------------------------------------------------------------------------------------------------------------------------------------------------------------------------------------------------------------------------------------------------------------|----------------------------------------------|--------------------------|-----------------|--------------------------------------|-----------------------------------------------------------------------------------------------------------------------------------|-------------------------------------------------------------------------|---------------------------------------------------|
|             |            | Donor eligibility                                                                                                                                                                                                                                                                                                                                                                                                                                                                                                                                                                                                                         | Antibody titer cut-off for donor eligibility | Antibody titer of donors | Male donors (%) | Donors hospitalized for COVID-19 (%) | Volume of plasma transfused (mL/kg or mL; specify the units in this field)                                                        | Days since onset of symptoms at point of randomization /plasma infusion | IVIG Product                                      |
|             |            | history and examination, who have had transfusion of blood products in last one year were excluded from donation.                                                                                                                                                                                                                                                                                                                                                                                                                                                                                                                         |                                              |                          |                 |                                      |                                                                                                                                   |                                                                         |                                                   |
| 9262, 20051 | Sakoulas   | NA                                                                                                                                                                                                                                                                                                                                                                                                                                                                                                                                                                                                                                        | NA                                           | NA                       | NA              | NA                                   | NA                                                                                                                                | NA                                                                      | Octagem                                           |
| 18265       | Salman     | Recovered plasma (CRP) was accepted from donors who had a history of COVID-19 infection confirmed by positive nasopharyngeal swab/oropharyngeal swab test, and have complete recovery of symptoms for at least 2 weeks prior to donation, documented with negative nasopharyngeal/oropharyngeal swab. All blood products followed standard blood handling and processing procedures and regulations.                                                                                                                                                                                                                                      | NR                                           | NR                       | NR              | NR                                   | 250 mL                                                                                                                            | NR                                                                      | NA                                                |
| 15876       | Shi        | NA                                                                                                                                                                                                                                                                                                                                                                                                                                                                                                                                                                                                                                        | NA                                           | NA                       | NA              | NA                                   | NA                                                                                                                                | NA                                                                      | NA                                                |
| 11072       | Shu        | NA                                                                                                                                                                                                                                                                                                                                                                                                                                                                                                                                                                                                                                        | NA                                           | NA                       | NA              | NA                                   | NA                                                                                                                                | NA                                                                      | NA                                                |
| Simonovich  | Simonovich | Patients with a history of SARS-CoV-2 diagnosis confirmed by RT-PCR, fully recovered from a clinical perspective and discharged from the hospital for at least 2 weeks, and were considered eligible for donation. In accordance with the current Argentinian law and regulations of blood and blood products and recommendations of the National Directorate of Blood and Blood Derivatives, eligibility criteria for plasma donation were as follows: age of 18 through 65 years, suitable for blood donation, with full clinical recovery after 28 days of Covid-19 diagnosis. Multiparous female donors must have a negative test for | 1:400                                        | 1:300                    | NR              | NR                                   | 5-10 ml/kg with an inferior limit around 400 ml for patients whose body weight was below 70 kg and a superior limit of 600 ml for | NR                                                                      | NA                                                |



| Ref ID | 1st Author | Convalescent plasma characteristics                                                                                                                                                                              |                                              |                          |                 |                                      |                                                                            |                                                                         | Intravenous Immunoglobulin (IVIG) characteristics |
|--------|------------|------------------------------------------------------------------------------------------------------------------------------------------------------------------------------------------------------------------|----------------------------------------------|--------------------------|-----------------|--------------------------------------|----------------------------------------------------------------------------|-------------------------------------------------------------------------|---------------------------------------------------|
|        |            | Donor eligibility                                                                                                                                                                                                | Antibody titer cut-off for donor eligibility | Antibody titer of donors | Male donors (%) | Donors hospitalized for COVID-19 (%) | Volume of plasma transfused (mL/kg or mL; specify the units in this field) | Days since onset of symptoms at point of randomization /plasma infusion | IVIG Product                                      |
|        |            | human leukocyte antigens (HLA) with a Luminex® assay. Transfusion-transmissible infections testing was performed in all donors at least two times, pre-donor screening and the convalescent plasma donation day. |                                              |                          |                 |                                      | those above 70 kg                                                          |                                                                         |                                                   |
| 18897  | Tabarsi    | NA                                                                                                                                                                                                               | NA                                           | NA                       | NA              | NA                                   | NA                                                                         | NA                                                                      | Intratect® (Biotest)                              |

## Discrepancies between preprint and peer-reviewed publications

| Study                                                | Differences between study preprint and peer-reviewed publications                                                                                                                                                                                                                                                                                                                                                                                                                                                                                                                                                                                                                              |
|------------------------------------------------------|------------------------------------------------------------------------------------------------------------------------------------------------------------------------------------------------------------------------------------------------------------------------------------------------------------------------------------------------------------------------------------------------------------------------------------------------------------------------------------------------------------------------------------------------------------------------------------------------------------------------------------------------------------------------------------------------|
| Agarwal; PLACID                                      | <ul style="list-style-type: none"> <li>● The peer-reviewed publication reports median CRP and d-dimer levels at baseline.</li> <li>● The peer-reviewed publication reports a per protocol analysis of secondary outcomes, whereas the preprint reports an intention-to-treat analysis.</li> <li>● The peer-reviewed publication analyzes more patients and reports more events for invasive mechanical ventilation.</li> <li>● The peer-reviewed publication analyzes more patients and reports more events for viral clearance at day 7.</li> <li>● The peer-reviewed publication analyzes duration of hospitalization (n=451) in fewer patients compared to the preprint (n=464).</li> </ul> |
| AlQahtani                                            | <ul style="list-style-type: none"> <li>● The peer-reviewed publication reports length of hospital stay.</li> </ul>                                                                                                                                                                                                                                                                                                                                                                                                                                                                                                                                                                             |
| Balcells                                             | <ul style="list-style-type: none"> <li>● The peer-reviewed publication includes additional details about donor eligibility.</li> <li>● The peer-reviewed publication includes the proportion of hospitalized convalescent plasma donors.</li> </ul>                                                                                                                                                                                                                                                                                                                                                                                                                                            |
| Gharbharan; Convalescent-plasma-for-COVID (ConCOVID) | <ul style="list-style-type: none"> <li>● The peer-reviewed publication reports median duration of hospital stay; the preprint does not explicitly report this.</li> <li>● Risk of bias due to competing risk with death for duration of hospital stay changed from definitely low risk to probably low risk of bias.</li> </ul>                                                                                                                                                                                                                                                                                                                                                                |
| Gharebaghi                                           | <ul style="list-style-type: none"> <li>● The peer-reviewed publication reports the name of the IVIG product.</li> </ul>                                                                                                                                                                                                                                                                                                                                                                                                                                                                                                                                                                        |
| Horby_1; RECOVERY                                    | <ul style="list-style-type: none"> <li>● The peer-reviewed publication reports a greater percentage of patients with confirmed COVID-19 at enrolment.</li> <li>● The peer-reviewed publication reports one additional event for 28-day mortality in the convalescent plasma group.</li> <li>● The peer-reviewed publication reports more events for need for mechanical ventilation.</li> <li>● The peer-reviewed publication explicitly reports medians and IQRs for duration of hospital stay.</li> </ul>                                                                                                                                                                                    |
| Lanzoni                                              | <ul style="list-style-type: none"> <li>● There are minor differences in age, % smokers, % with heart disease, and % with hypertension between the preprint and peer-reviewed publication.</li> </ul>                                                                                                                                                                                                                                                                                                                                                                                                                                                                                           |
| Libster; Fundacion INFANT-COVID-19                   | <ul style="list-style-type: none"> <li>● No substantive differences between the preprint and peer-reviewed publications.</li> </ul>                                                                                                                                                                                                                                                                                                                                                                                                                                                                                                                                                            |
| Lopardo                                              | <ul style="list-style-type: none"> <li>● The peer-reviewed publication reports length of hospital stay.</li> </ul>                                                                                                                                                                                                                                                                                                                                                                                                                                                                                                                                                                             |

|                        |                                                                                                                                                                                                                                                                                                                                                                                                                                                                                                                                                                                                                                                                                                                                                                                                                                                                                                                                                                                                                                                                                                                                                                                                                                        |
|------------------------|----------------------------------------------------------------------------------------------------------------------------------------------------------------------------------------------------------------------------------------------------------------------------------------------------------------------------------------------------------------------------------------------------------------------------------------------------------------------------------------------------------------------------------------------------------------------------------------------------------------------------------------------------------------------------------------------------------------------------------------------------------------------------------------------------------------------------------------------------------------------------------------------------------------------------------------------------------------------------------------------------------------------------------------------------------------------------------------------------------------------------------------------------------------------------------------------------------------------------------------|
|                        | <ul style="list-style-type: none"> <li>● Duration of ventilation is reported in the preprint but not in the peer-reviewed publication. We included data from the preprint as the numbers are unlikely to change.</li> </ul>                                                                                                                                                                                                                                                                                                                                                                                                                                                                                                                                                                                                                                                                                                                                                                                                                                                                                                                                                                                                            |
| O'Donnell              | <ul style="list-style-type: none"> <li>● No substantive differences between the preprint and peer-reviewed publications.</li> </ul>                                                                                                                                                                                                                                                                                                                                                                                                                                                                                                                                                                                                                                                                                                                                                                                                                                                                                                                                                                                                                                                                                                    |
| Sakoulas               | <ul style="list-style-type: none"> <li>● The peer-reviewed publication reports one more patient with coronary artery disease as a comorbidity.</li> <li>● The preprint reports hospital length of stay only for a subgroup of patients with A-a gradient &gt; 200. The peer-reviewed publication reports hospital length of stay for the total study sample.</li> <li>● The preprint reports ICU length of stay only for a subgroup of patients with A-a gradient &gt; 200. The peer-reviewed publication reports ICU length of stay for the total study sample.</li> <li>● Allergic reaction is reported in the preprint but not in the peer-reviewed publication.</li> <li>● The peer-reviewed publication explicitly reports concealed allocation so risk of bias for the domain randomization changed from probably high to definitely low risk of bias.</li> <li>● Risk of bias for selective reporting of hospital length of stay changed to low risk since the outcome is not reported for a subgroup in the peer-reviewed publication.</li> <li>● Risk of bias for selective reporting of ICU length of stay changed to low risk since the outcome is not reported for a subgroup in the peer-reviewed publication.</li> </ul> |
| Simonovich;<br>PlasmAr | <ul style="list-style-type: none"> <li>● No substantive differences between the preprint and peer-reviewed publications.</li> </ul>                                                                                                                                                                                                                                                                                                                                                                                                                                                                                                                                                                                                                                                                                                                                                                                                                                                                                                                                                                                                                                                                                                    |

## Risk of bias assessments by outcome

## NON-SEVERE COVID-19

## Mortality

| Treatment 1                | Treatment 2           | First author     | N    | Randomization              | Deviations from the intended intervention | Missing outcome data      | Measurement of outcome | Selection of the reported results |
|----------------------------|-----------------------|------------------|------|----------------------------|-------------------------------------------|---------------------------|------------------------|-----------------------------------|
| CT-P59 monoclonal antibody | placebo/standard care | Eom              | 307  | low risk of bias           | low risk of bias                          | low risk of bias          | low risk of bias       | low risk of bias                  |
|                            |                       |                  | 307  |                            |                                           |                           |                        |                                   |
| bamlanivimab               | placebo/standard care |                  | 452  | low risk of bias           | low risk of bias                          | low risk of bias          | low risk of bias       | probably low risk of bias         |
|                            |                       | Chen_1           | 452  |                            |                                           |                           |                        |                                   |
| bamlanivimab, etesevimab   | placebo/standard care |                  | 1035 | low risk of bias           | low risk of bias                          | low risk of bias          | low risk of bias       | low risk of bias                  |
|                            |                       | Dougan           | 1035 |                            |                                           |                           |                        |                                   |
| casirivimab, imdevimab     | placebo/standard care |                  | 7015 | probably low risk of bias  | low risk of bias                          | probably low risk of bias | low risk of bias       | low risk of bias                  |
|                            |                       | Weinreich_2_1    | 2696 | probably low risk of bias  | low risk of bias                          | probably low risk of bias | low risk of bias       | low risk of bias                  |
|                            |                       | Weinreich_2_2    | 1484 | probably low risk of bias  | low risk of bias                          | probably low risk of bias | low risk of bias       | low risk of bias                  |
|                            |                       | Weinreich_2_3    | 1218 | probably low risk of bias  | low risk of bias                          | probably low risk of bias | low risk of bias       | low risk of bias                  |
|                            |                       | Horby_2          | 641  | low risk of bias           | probably high risk of bias                | low risk of bias          | low risk of bias       | low risk of bias                  |
|                            |                       | Weinreich_3      | 665  | probably low risk of bias  | low risk of bias                          | low risk of bias          | low risk of bias       | low risk of bias                  |
| control plasma             | convalescent plasma   | O'Donnell        | 10   | low risk of bias           | low risk of bias                          | low risk of bias          | low risk of bias       | low risk of bias                  |
|                            |                       | Bennett-Guerrero | 60   | low risk of bias           | low risk of bias                          | low risk of bias          | low risk of bias       | low risk of bias                  |
| convalescent plasma        | placebo/standard care |                  | 1602 | probably high risk of bias | probably high risk of bias                | low risk of bias          | low risk of bias       | low risk of bias                  |
|                            |                       | Avendano-Sola    | 81   | probably high risk of bias | probably high risk of bias                | low risk of bias          | low risk of bias       | low risk of bias                  |
|                            |                       | Agarwal          | 464  | low risk of bias           | probably high risk of bias                | low risk of bias          | low risk of bias       | low risk of bias                  |
|                            |                       | Libster          | 160  | probably low risk of bias  | low risk of bias                          | low risk of bias          | low risk of bias       | low risk of bias                  |
|                            |                       | Horby_1          | 897  | low risk of bias           | probably high risk of bias                | low risk of bias          | low risk of bias       | low risk of bias                  |
| placebo/standard care      | sotrovimab            |                  | 583  | low risk of bias           | low risk of bias                          | low risk of bias          | low risk of bias       | low risk of bias                  |
|                            |                       | Gupta            | 583  |                            |                                           |                           |                        |                                   |

## Mechanical ventilation

| Treatment 1                | Treatment 2           | First author  | N    | Randomization              | Deviations from the intended intervention | Missing outcome data      | Measurement of outcome | Selection of the reported results |
|----------------------------|-----------------------|---------------|------|----------------------------|-------------------------------------------|---------------------------|------------------------|-----------------------------------|
| CT-P59 monoclonal antibody | placebo/standard care | Eom           | 307  | low risk of bias           | low risk of bias                          | low risk of bias          | low risk of bias       | low risk of bias                  |
|                            |                       |               | 307  |                            |                                           |                           |                        |                                   |
| casirivimab, imdevimab     | placebo/standard care |               | 4180 | probably low risk of bias  | low risk of bias                          | probably low risk of bias | low risk of bias       | low risk of bias                  |
|                            |                       | Weinreich_2_1 | 2696 | probably low risk of bias  | low risk of bias                          | probably low risk of bias | low risk of bias       | low risk of bias                  |
|                            |                       | Weinreich_2_2 | 1484 | probably low risk of bias  | low risk of bias                          | probably low risk of bias | low risk of bias       | low risk of bias                  |
| control plasma             | convalescent plasma   | O'Donnell     | 10   | low risk of bias           | low risk of bias                          | low risk of bias          | low risk of bias       | probably low risk of bias         |
|                            |                       |               | 10   |                            |                                           |                           |                        |                                   |
| convalescent plasma        | placebo/standard care |               | 705  | probably high risk of bias | probably high risk of bias                | low risk of bias          | low risk of bias       | low risk of bias                  |
|                            |                       | Avendano-Sola | 81   | probably high risk of bias | probably high risk of bias                | low risk of bias          | low risk of bias       | probably low risk of bias         |
|                            |                       | Agarwal       | 464  | low risk of bias           | probably high risk of bias                | low risk of bias          | low risk of bias       | low risk of bias                  |
|                            |                       | Libster       | 160  | probably low risk of bias  | low risk of bias                          | low risk of bias          | low risk of bias       | low risk of bias                  |
| placebo/standard care      | sotrovimab            |               | 583  | low risk of bias           | low risk of bias                          | low risk of bias          | low risk of bias       | low risk of bias                  |
|                            |                       | Gupta         | 583  |                            |                                           |                           |                        |                                   |

## Hospitalization

| Treatment 1                | Treatment 2           | First author | N    | Randomization    | Deviations from the intended intervention | Missing outcome data | Measurement of outcome | Selection of the reported results |
|----------------------------|-----------------------|--------------|------|------------------|-------------------------------------------|----------------------|------------------------|-----------------------------------|
| CT-P59 monoclonal antibody | placebo/standard care | Eom          | 307  | low risk of bias | low risk of bias                          | low risk of bias     | low risk of bias       | low risk of bias                  |
|                            |                       |              | 307  |                  |                                           |                      |                        |                                   |
| bamlanivimab               | placebo/standard care |              | 452  | low risk of bias | low risk of bias                          | low risk of bias     | low risk of bias       | low risk of bias                  |
|                            |                       | Chen_1       | 452  |                  |                                           |                      |                        |                                   |
| bamlanivimab, etesevimab   | placebo/standard care |              | 1035 | low risk of bias | low risk of bias                          | low risk of bias     | low risk of bias       | low risk of bias                  |
|                            |                       | Dougan       | 1035 |                  |                                           |                      |                        |                                   |

|                        |                       |      |                                                                                                                   |                                                                                                                                               |                                                                                                  |                                                                                                                             |                                                                                                  |                                                                                                  |                                                                                                   |
|------------------------|-----------------------|------|-------------------------------------------------------------------------------------------------------------------|-----------------------------------------------------------------------------------------------------------------------------------------------|--------------------------------------------------------------------------------------------------|-----------------------------------------------------------------------------------------------------------------------------|--------------------------------------------------------------------------------------------------|--------------------------------------------------------------------------------------------------|---------------------------------------------------------------------------------------------------|
| casirivimab, imdevimab | placebo/standard care | 6267 | Weinreich_2_1<br>2696<br>Weinreich_2_2<br>1484<br>Weinreich_2_3<br>1218<br>Weinreich_3<br>665<br>O'Brien_1<br>204 | probably low risk of bias<br>probably low risk of bias<br>probably low risk of bias<br>probably low risk of bias<br>probably low risk of bias | low risk of bias<br>low risk of bias<br>low risk of bias<br>low risk of bias<br>low risk of bias | probably low risk of bias<br>probably low risk of bias<br>probably low risk of bias<br>low risk of bias<br>low risk of bias | low risk of bias<br>low risk of bias<br>low risk of bias<br>low risk of bias<br>low risk of bias | low risk of bias<br>low risk of bias<br>low risk of bias<br>low risk of bias<br>low risk of bias | low risk of bias<br>low risk of bias<br>low risk of bias<br>low risk of bias<br>high risk of bias |
| placebo/standard care  | sotrovimab            | 583  | Gupta                                                                                                             | 583                                                                                                                                           | low risk of bias                                                                                 | low risk of bias                                                                                                            | low risk of bias                                                                                 | low risk of bias                                                                                 | low risk of bias                                                                                  |

**Viral clearance at 7 days**

| Treatment 1                | Treatment 2              | First author             | N         | Randomization                                  | Deviations from the intended intervention                | Missing outcome data                 | Measurement of outcome               | Selection of the reported results    |
|----------------------------|--------------------------|--------------------------|-----------|------------------------------------------------|----------------------------------------------------------|--------------------------------------|--------------------------------------|--------------------------------------|
| CT-P59 monoclonal antibody | placebo/standard care    | Eom                      | 299       | low risk of bias                               | low risk of bias                                         | low risk of bias                     | low risk of bias                     | low risk of bias                     |
| bamlanivimab               | bamlanivimab, etesevimab | Gottlieb                 | 399       | low risk of bias                               | low risk of bias                                         | low risk of bias                     | low risk of bias                     | low risk of bias                     |
| bamlanivimab               | placebo/standard care    | Gottlieb                 | 444       | low risk of bias                               | low risk of bias                                         | low risk of bias                     | low risk of bias                     | low risk of bias                     |
| bamlanivimab, etesevimab   | placebo/standard care    | Gottlieb                 | 245       | low risk of bias                               | low risk of bias                                         | low risk of bias                     | low risk of bias                     | low risk of bias                     |
| convalescent plasma        | placebo/standard care    | Avendano-Sola<br>Agarwal | 81<br>350 | probably high risk of bias<br>low risk of bias | probably high risk of bias<br>probably high risk of bias | low risk of bias<br>low risk of bias | low risk of bias<br>low risk of bias | low risk of bias<br>low risk of bias |

**Length of hospital stay**

| Treatment 1              | Treatment 2           | First author                       | N               | Randomization                                          | Deviations from the intended intervention                | Missing outcome data                 | Measurement of outcome               | Selection of the reported results             | Other                                                                      |
|--------------------------|-----------------------|------------------------------------|-----------------|--------------------------------------------------------|----------------------------------------------------------|--------------------------------------|--------------------------------------|-----------------------------------------------|----------------------------------------------------------------------------|
| bamlanivimab, etesevimab | placebo/standard care | Dougan                             | 44              | low risk of bias                                       | low risk of bias                                         | low risk of bias                     | low risk of bias                     | probably low risk of bias                     | low risk of bias                                                           |
| casirivimab, imdevimab   | placebo/standard care | Weinreich_2_1<br>Weinreich_2_2     | 111<br>80<br>31 | probably low risk of bias<br>probably low risk of bias | low risk of bias<br>low risk of bias                     | low risk of bias<br>low risk of bias | low risk of bias<br>low risk of bias | low risk of bias<br>low risk of bias          | low risk of bias<br>low risk of bias                                       |
| convalescent plasma      | placebo/standard care | Avendano-Sola<br>Agarwal<br>Korper | 81<br>464<br>69 | probably high risk of bias<br>low risk of bias         | probably high risk of bias<br>probably high risk of bias | low risk of bias<br>low risk of bias | low risk of bias<br>low risk of bias | probably low risk of bias<br>low risk of bias | probably low risk of bias<br>probably low risk of bias<br>low risk of bias |

**Time to symptom resolution**

| Treatment 1                | Treatment 2              | First author                                | N                          | Randomization                                                                       | Deviations from the intended intervention                | Missing outcome data                                       | Measurement of outcome                                   | Selection of the reported results                        | Other                                                    |
|----------------------------|--------------------------|---------------------------------------------|----------------------------|-------------------------------------------------------------------------------------|----------------------------------------------------------|------------------------------------------------------------|----------------------------------------------------------|----------------------------------------------------------|----------------------------------------------------------|
| CT-P59 monoclonal antibody | placebo/standard care    | Eom                                         | 307                        | low risk of bias                                                                    | low risk of bias                                         | low risk of bias                                           | low risk of bias                                         | low risk of bias                                         | low risk of bias                                         |
| bamlanivimab               | bamlanivimab, etesevimab | Gottlieb                                    | 418                        | low risk of bias                                                                    | low risk of bias                                         | low risk of bias                                           | low risk of bias                                         | low risk of bias                                         | probably low risk of bias                                |
| bamlanivimab               | placebo/standard care    | Gottlieb                                    | 461                        | low risk of bias                                                                    | low risk of bias                                         | low risk of bias                                           | low risk of bias                                         | low risk of bias                                         | probably low risk of bias                                |
| bamlanivimab, etesevimab   | placebo/standard care    | Gottlieb<br>Dougan                          | 261<br>1005                | low risk of bias<br>low risk of bias                                                | low risk of bias<br>low risk of bias                     | low risk of bias<br>low risk of bias                       | low risk of bias<br>low risk of bias                     | low risk of bias<br>low risk of bias                     | probably low risk of bias<br>low risk of bias            |
| casirivimab, imdevimab     | placebo/standard care    | Weinreich_2_1<br>Weinreich_2_2<br>O'Brien_1 | 3837<br>2411<br>1353<br>73 | probably low risk of bias<br>probably low risk of bias<br>probably low risk of bias | low risk of bias<br>low risk of bias<br>low risk of bias | high risk of bias<br>high risk of bias<br>low risk of bias | low risk of bias<br>low risk of bias<br>low risk of bias | low risk of bias<br>low risk of bias<br>low risk of bias | low risk of bias<br>low risk of bias<br>low risk of bias |
| convalescent plasma        | placebo/standard care    | Avendano-Sola<br>Korper                     | 81<br>69                   | probably high risk of bias<br>low risk of bias                                      | probably high risk of bias<br>probably high risk of bias | low risk of bias<br>low risk of bias                       | low risk of bias<br>high risk of bias                    | probably low risk of bias<br>low risk of bias            | probably low risk of bias<br>low risk of bias            |

## SEVERE OR CRITICAL COVID-19

## Mortality

| Treatment 1                              | Treatment 2                           | First author    | N     | Randomization              | Deviations from the intended intervention | Missing outcome data      | Measurement of outcome | Selection of the reported results |
|------------------------------------------|---------------------------------------|-----------------|-------|----------------------------|-------------------------------------------|---------------------------|------------------------|-----------------------------------|
| XAV-19                                   | placebo/standard care                 | Gaborit         | 17    | low risk of bias           | low risk of bias                          | low risk of bias          | low risk of bias       | probably high risk of bias        |
| anti-COVID-19 intravenous immunoglobulin | placebo/standard care                 | Ali             | 50    | low risk of bias           | probably high risk of bias                | low risk of bias          | low risk of bias       | low risk of bias                  |
| casirivimab, imdevimab                   | placebo/standard care                 | Horby_2         | 9144  | low risk of bias           | probably high risk of bias                | low risk of bias          | low risk of bias       | low risk of bias                  |
| control plasma                           | convalescent plasma                   | Bajpai          | 29    | low risk of bias           | probably high risk of bias                | low risk of bias          | low risk of bias       | low risk of bias                  |
|                                          |                                       | O'Donnell       | 210   | low risk of bias           | low risk of bias                          | low risk of bias          | low risk of bias       | low risk of bias                  |
|                                          |                                       | Bennett-Guerrer | 14    | low risk of bias           | low risk of bias                          | low risk of bias          | low risk of bias       | low risk of bias                  |
| convalescent plasma                      | intravenous immunoglobulin            | Gonzalez        | 190   | probably high risk of bias | probably high risk of bias                | low risk of bias          | low risk of bias       | low risk of bias                  |
| convalescent plasma                      | placebo/standard care                 | Li              | 101   | low risk of bias           | probably high risk of bias                | low risk of bias          | low risk of bias       | low risk of bias                  |
|                                          |                                       | Gharbharan      | 86    | low risk of bias           | probably high risk of bias                | low risk of bias          | low risk of bias       | low risk of bias                  |
|                                          |                                       | AlQahtani       | 40    | probably high risk of bias | probably high risk of bias                | low risk of bias          | low risk of bias       | low risk of bias                  |
|                                          |                                       | Simonovich      | 333   | low risk of bias           | low risk of bias                          | low risk of bias          | low risk of bias       | low risk of bias                  |
|                                          |                                       | Ray             | 80    | probably high risk of bias | probably high risk of bias                | low risk of bias          | low risk of bias       | probably high risk of bias        |
|                                          |                                       | Horby_1         | 10661 | low risk of bias           | probably high risk of bias                | low risk of bias          | low risk of bias       | low risk of bias                  |
|                                          |                                       | Pouladzadeh     | 60    | low risk of bias           | probably high risk of bias                | low risk of bias          | low risk of bias       | probably low risk of bias         |
|                                          |                                       | Estcourt        | 1979  | low risk of bias           | probably high risk of bias                | low risk of bias          | low risk of bias       | low risk of bias                  |
|                                          |                                       | Bégin           | 866   | low risk of bias           | probably high risk of bias                | low risk of bias          | low risk of bias       | low risk of bias                  |
|                                          |                                       | Sekine          | 160   | probably high risk of bias | probably high risk of bias                | low risk of bias          | low risk of bias       | low risk of bias                  |
| intravenous immunoglobulin               | placebo/standard care                 | Sakoulas        | 33    | low risk of bias           | high risk of bias                         | low risk of bias          | low risk of bias       | probably low risk of bias         |
|                                          |                                       | Gharebaghi      | 59    | low risk of bias           | low risk of bias                          | probably low risk of bias | low risk of bias       | low risk of bias                  |
|                                          |                                       | Tabarsi         | 84    | low risk of bias           | probably high risk of bias                | low risk of bias          | low risk of bias       | low risk of bias                  |
|                                          |                                       | Raman           | 100   | probably high risk of bias | probably high risk of bias                | low risk of bias          | low risk of bias       | low risk of bias                  |
| placebo/standard care                    | therapeutic plasma exchange           | Faqihi          | 87    | low risk of bias           | probably high risk of bias                | low risk of bias          | low risk of bias       | probably high risk of bias        |
| placebo/standard care                    | umbilical cord mesenchymal stem cells | Shu             | 41    | probably high risk of bias | probably high risk of bias                | low risk of bias          | low risk of bias       | probably low risk of bias         |
|                                          |                                       | Shi             | 100   | low risk of bias           | low risk of bias                          | low risk of bias          | low risk of bias       | low risk of bias                  |
|                                          |                                       | Lanzoni         | 24    | probably low risk of bias  | low risk of bias                          | low risk of bias          | low risk of bias       | probably high risk of bias        |
|                                          |                                       | Adas            | 20    | probably high risk of bias | probably high risk of bias                | low risk of bias          | low risk of bias       | probably low risk of bias         |

## Mechanical ventilation

| Treatment 1                              | Treatment 2           | First author | N   | Randomization              | Deviations from the intended intervention | Missing outcome data | Measurement of outcome | Selection of the reported results |
|------------------------------------------|-----------------------|--------------|-----|----------------------------|-------------------------------------------|----------------------|------------------------|-----------------------------------|
| XAV-19                                   | placebo/standard care | Gaborit      | 17  | low risk of bias           | low risk of bias                          | low risk of bias     | low risk of bias       | low risk of bias                  |
| anti-COVID-19 intravenous immunoglobulin | placebo/standard care | Ali          | 50  | low risk of bias           | probably high risk of bias                | low risk of bias     | low risk of bias       | probably low risk of bias         |
| control plasma                           | convalescent plasma   | Bajpai       | 29  | low risk of bias           | probably high risk of bias                | low risk of bias     | low risk of bias       | low risk of bias                  |
|                                          |                       | O'Donnell    | 210 | low risk of bias           | low risk of bias                          | low risk of bias     | low risk of bias       | probably low risk of bias         |
| convalescent plasma                      | placebo/standard care | AlQahtani    | 40  | probably high risk of bias | probably high risk of bias                | low risk of bias     | low risk of bias       | low risk of bias                  |
|                                          |                       | Simonovich   | 333 | low risk of bias           | low risk of bias                          | low risk of bias     | low risk of bias       | low risk of bias                  |
|                                          |                       | Pouladzadeh  | 60  | low risk of bias           | probably high risk of bias                | low risk of bias     | low risk of bias       | probably low risk of bias         |
|                                          |                       | Hamdy Salman | 30  | low risk of bias           | probably high risk of bias                | low risk of bias     | low risk of bias       | probably low risk of bias         |
|                                          |                       | Sekine       | 160 | probably high risk of bias | probably high risk of bias                | low risk of bias     | low risk of bias       | low risk of bias                  |

|                            |                                       |          |     |                            |                            |                  |                  |                           |  |
|----------------------------|---------------------------------------|----------|-----|----------------------------|----------------------------|------------------|------------------|---------------------------|--|
| intravenous immunoglobulin | placebo/standard care                 |          | 117 |                            |                            |                  |                  |                           |  |
|                            |                                       | Sakoulas | 33  | low risk of bias           | high risk of bias          | low risk of bias | low risk of bias | low risk of bias          |  |
|                            |                                       | Tabarsi  | 84  | low risk of bias           | probably high risk of bias | low risk of bias | low risk of bias | low risk of bias          |  |
| placebo/standard care      | umbilical cord mesenchymal stem cells |          | 141 |                            |                            |                  |                  |                           |  |
|                            |                                       | Shu      | 41  | probably high risk of bias | probably high risk of bias | low risk of bias | low risk of bias | probably low risk of bias |  |
|                            |                                       | Shi      | 100 | low risk of bias           | low risk of bias           | low risk of bias | low risk of bias | probably low risk of bias |  |

**Viral clearance at 7 days**

| Treatment 1                | Treatment 2           | First author | N   | Randomization              | Deviations from the intended intervention | Missing outcome data | Measurement of outcome | Selection of the reported results |
|----------------------------|-----------------------|--------------|-----|----------------------------|-------------------------------------------|----------------------|------------------------|-----------------------------------|
| XAV-19                     | placebo/standard care | Gaborit      | 9   | low risk of bias           | low risk of bias                          | low risk of bias     | low risk of bias       | probably low risk of bias         |
| convalescent plasma        | placebo/standard care | Hamdy Salman | 147 | low risk of bias           | probably high risk of bias                | low risk of bias     | low risk of bias       | probably low risk of bias         |
|                            |                       | Sekine       | 117 | probably high risk of bias | probably high risk of bias                | low risk of bias     | low risk of bias       | low risk of bias                  |
| intravenous immunoglobulin | placebo/standard care | Raman        | 100 | probably high risk of bias | probably high risk of bias                | low risk of bias     | low risk of bias       | probably low risk of bias         |

**Hospital length of stay**

| Treatment 1                              | Treatment 2                           | First author | N    | Randomization              | Deviations from the intended intervention | Missing outcome data      | Measurement of outcome | Selection of the reported results | Other                      |
|------------------------------------------|---------------------------------------|--------------|------|----------------------------|-------------------------------------------|---------------------------|------------------------|-----------------------------------|----------------------------|
| XAV-19                                   | placebo/standard care                 | Gaborit      | 17   | low risk of bias           | low risk of bias                          | low risk of bias          | low risk of bias       | low risk of bias                  | low risk of bias           |
| anti-COVID-19 intravenous immunoglobulin | placebo/standard care                 | Ali          | 50   | low risk of bias           | probably high risk of bias                | low risk of bias          | low risk of bias       | low risk of bias                  | probably low risk of bias  |
| control plasma                           | convalescent plasma                   | Bajpai       | 29   | low risk of bias           | probably high risk of bias                | low risk of bias          | low risk of bias       | low risk of bias                  | high risk of bias          |
| convalescent plasma                      | placebo/standard care                 | Li           | 1740 | low risk of bias           | probably high risk of bias                | low risk of bias          | low risk of bias       | low risk of bias                  | low risk of bias           |
|                                          |                                       | Gharbharan   | 80   | low risk of bias           | probably high risk of bias                | low risk of bias          | low risk of bias       | low risk of bias                  | probably low risk of bias  |
|                                          |                                       | AlQahtani    | 37   | probably high risk of bias | probably high risk of bias                | low risk of bias          | low risk of bias       | probably low risk of bias         | low risk of bias           |
|                                          |                                       | Simonovich   | 333  | low risk of bias           | low risk of bias                          | low risk of bias          | low risk of bias       | low risk of bias                  | low risk of bias           |
|                                          |                                       | Ray          | 80   | probably high risk of bias | probably high risk of bias                | low risk of bias          | low risk of bias       | probably low risk of bias         | low risk of bias           |
|                                          |                                       | Pouladzadeh  | 60   | low risk of bias           | probably high risk of bias                | low risk of bias          | low risk of bias       | probably low risk of bias         | probably high risk of bias |
|                                          |                                       | Korper       | 36   | low risk of bias           | probably high risk of bias                | low risk of bias          | low risk of bias       | low risk of bias                  | low risk of bias           |
|                                          |                                       | Bégin        | 921  | low risk of bias           | probably high risk of bias                | low risk of bias          | low risk of bias       | low risk of bias                  | probably low risk of bias  |
|                                          |                                       | Sekine       | 90   | probably high risk of bias | probably high risk of bias                | low risk of bias          | low risk of bias       | low risk of bias                  | low risk of bias           |
| intravenous immunoglobulin               | placebo/standard care                 | Sakoulas     | 269  | low risk of bias           | high risk of bias                         | low risk of bias          | low risk of bias       | low risk of bias                  | low risk of bias           |
|                                          |                                       | Gharebaghi   | 59   | low risk of bias           | low risk of bias                          | probably low risk of bias | low risk of bias       | low risk of bias                  | probably high risk of bias |
|                                          |                                       | Tabarsi      | 84   | low risk of bias           | probably high risk of bias                | low risk of bias          | low risk of bias       | probably low risk of bias         | low risk of bias           |
|                                          |                                       | Raman        | 93   | probably high risk of bias | probably high risk of bias                | low risk of bias          | low risk of bias       | low risk of bias                  | low risk of bias           |
| placebo/standard care                    | umbilical cord mesenchymal stem cells | Shu          | 61   | probably high risk of bias | probably high risk of bias                | low risk of bias          | low risk of bias       | probably low risk of bias         | low risk of bias           |
|                                          |                                       | Adas         | 20   | probably high risk of bias | probably high risk of bias                | low risk of bias          | low risk of bias       | probably low risk of bias         | probably high risk of bias |

**ICU length of stay**

| Treatment 1                | Treatment 2           | First author | N    | Randomization    | Deviations from the intended intervention | Missing outcome data      | Measurement of outcome | Selection of the reported results | Other                      |
|----------------------------|-----------------------|--------------|------|------------------|-------------------------------------------|---------------------------|------------------------|-----------------------------------|----------------------------|
| control plasma             | convalescent plasma   | Bajpai       | 29   | low risk of bias | probably high risk of bias                | low risk of bias          | low risk of bias       | low risk of bias                  | probably high risk of bias |
| convalescent plasma        | placebo/standard care | Simonovich   | 1071 | low risk of bias | low risk of bias                          | low risk of bias          | low risk of bias       | low risk of bias                  | probably low risk of bias  |
|                            |                       | Korper       | 36   | low risk of bias | probably high risk of bias                | low risk of bias          | low risk of bias       | low risk of bias                  | low risk of bias           |
|                            |                       | Bégin        | 851  | low risk of bias | probably high risk of bias                | low risk of bias          | low risk of bias       | low risk of bias                  | probably low risk of bias  |
| intravenous immunoglobulin | placebo/standard care | Sakoulas     | 163  | low risk of bias | high risk of bias                         | low risk of bias          | low risk of bias       | low risk of bias                  | low risk of bias           |
|                            |                       | Gharebaghi   | 59   | low risk of bias | low risk of bias                          | probably low risk of bias | low risk of bias       | low risk of bias                  | probably high risk of bias |
|                            |                       | Tabarsi      | 66   | low risk of bias | probably high risk of bias                | low risk of bias          | low risk of bias       | probably low risk of bias         | low risk of bias           |

|                       |                                       |        |    |                            |                            |                  |                  |                           |                  |
|-----------------------|---------------------------------------|--------|----|----------------------------|----------------------------|------------------|------------------|---------------------------|------------------|
|                       |                                       | Raman  | 5  | probably high risk of bias | probably high risk of bias | low risk of bias | low risk of bias | low risk of bias          | low risk of bias |
| placebo/standard care | therapeutic plasma exchange           |        | 87 |                            |                            |                  |                  |                           |                  |
|                       |                                       | Faqihi | 87 | low risk of bias           | probably high risk of bias | low risk of bias | low risk of bias | low risk of bias          | low risk of bias |
| placebo/standard care | umbilical cord mesenchymal stem cells |        | 20 |                            |                            |                  |                  |                           |                  |
|                       |                                       | Adas   | 20 | probably high risk of bias | probably high risk of bias | low risk of bias | low risk of bias | probably low risk of bias | low risk of bias |

**Ventilator-free days (up to day 28)**

| Treatment 1         | Treatment 2           | First author    | N    | Randomization              | Deviations from the intended intervention | Missing outcome data | Measurement of outcome | Selection of the reported results | Other            |
|---------------------|-----------------------|-----------------|------|----------------------------|-------------------------------------------|----------------------|------------------------|-----------------------------------|------------------|
| control plasma      | convalescent plasma   |                 | 14   |                            |                                           |                      |                        |                                   |                  |
|                     |                       | Bennett-Guerrer | 14   | low risk of bias           | low risk of bias                          | low risk of bias     | low risk of bias       | low risk of bias                  | low risk of bias |
| convalescent plasma | placebo/standard care |                 | 2859 |                            |                                           |                      |                        |                                   |                  |
|                     |                       | Estcourt        | 1976 | low risk of bias           | probably high risk of bias                | low risk of bias     | low risk of bias       | low risk of bias                  | low risk of bias |
|                     |                       | Bégin           | 851  | low risk of bias           | probably high risk of bias                | low risk of bias     | low risk of bias       | low risk of bias                  | low risk of bias |
|                     |                       | Sekine          | 32   | probably high risk of bias | probably high risk of bias                | low risk of bias     | low risk of bias       | low risk of bias                  | low risk of bias |

**Duration of mechanical ventilation**

| Treatment 1                              | Treatment 2                 | First author | N  | Randomization              | Deviations from the intended intervention | Missing outcome data | Measurement of outcome | Selection of the reported results | Other            |
|------------------------------------------|-----------------------------|--------------|----|----------------------------|-------------------------------------------|----------------------|------------------------|-----------------------------------|------------------|
| anti-COVID-19 intravenous immunoglobulin | placebo/standard care       |              | 0  |                            |                                           |                      |                        |                                   |                  |
|                                          |                             | Ali          | 0  | low risk of bias           | probably high risk of bias                | low risk of bias     | low risk of bias       | low risk of bias                  | low risk of bias |
| convalescent plasma                      | placebo/standard care       |              | 10 |                            |                                           |                      |                        |                                   |                  |
|                                          |                             | AlQahtani    | 10 | probably high risk of bias | probably high risk of bias                | low risk of bias     | low risk of bias       | probably low risk of bias         | low risk of bias |
| intravenous immunoglobulin               | placebo/standard care       |              | 64 |                            |                                           |                      |                        |                                   |                  |
|                                          |                             | Sakoulas     | 33 | low risk of bias           | high risk of bias                         | low risk of bias     | low risk of bias       | low risk of bias                  | low risk of bias |
|                                          |                             | Raman        | 31 | probably high risk of bias | probably high risk of bias                | low risk of bias     | low risk of bias       | low risk of bias                  | low risk of bias |
| placebo/standard care                    | therapeutic plasma exchange |              | 87 |                            |                                           |                      |                        |                                   |                  |
|                                          |                             | Faqihi       | 87 | low risk of bias           | probably high risk of bias                | low risk of bias     | low risk of bias       | low risk of bias                  | low risk of bias |

**ADVERSE EVENTS - ANY SEVERITY ILLNESS****Adverse effects leading to discontinuation of the intervention**

| Treatment 1                | Treatment 2                           | First author    | N    | Randomization              | Deviations from the intended intervention | Missing outcome data | Measurement of outcome | Selection of the reported results |
|----------------------------|---------------------------------------|-----------------|------|----------------------------|-------------------------------------------|----------------------|------------------------|-----------------------------------|
| XAV-19                     | placebo/standard care                 |                 | 18   |                            |                                           |                      |                        |                                   |
|                            |                                       | Gaborit         | 18   | low risk of bias           | low risk of bias                          | low risk of bias     | low risk of bias       | low risk of bias                  |
| bamlanivimab               | placebo/standard care                 |                 | 452  |                            |                                           |                      |                        |                                   |
|                            |                                       | Chen_1          | 452  | low risk of bias           | low risk of bias                          | low risk of bias     | low risk of bias       | low risk of bias                  |
| casirivimab, imdevimab     | placebo/standard care                 |                 | 5872 |                            |                                           |                      |                        |                                   |
|                            |                                       | Weinreich_2_1   | 2988 | probably low risk of bias  | low risk of bias                          | low risk of bias     | low risk of bias       | low risk of bias                  |
|                            |                                       | Weinreich_2_2   | 1667 | probably low risk of bias  | low risk of bias                          | low risk of bias     | low risk of bias       | low risk of bias                  |
|                            |                                       | Weinreich_2_3   | 1337 | probably low risk of bias  | low risk of bias                          | low risk of bias     | low risk of bias       | low risk of bias                  |
|                            |                                       | Weinreich_3     | 780  | probably low risk of bias  | low risk of bias                          | low risk of bias     | low risk of bias       | low risk of bias                  |
| control plasma             | convalescent plasma                   |                 | 72   |                            |                                           |                      |                        |                                   |
|                            |                                       | Bennett-Guerrer | 72   | low risk of bias           | low risk of bias                          | low risk of bias     | low risk of bias       | probably low risk of bias         |
| convalescent plasma        | intravenous immunoglobulin            |                 | 190  |                            |                                           |                      |                        |                                   |
|                            |                                       | Gonzalez        | 190  | probably high risk of bias | probably high risk of bias                | low risk of bias     | high risk of bias      | probably low risk of bias         |
| convalescent plasma        | placebo/standard care                 |                 | 105  |                            |                                           |                      |                        |                                   |
|                            |                                       | Korper          | 105  | low risk of bias           | probably high risk of bias                | low risk of bias     | high risk of bias      | low risk of bias                  |
| intravenous immunoglobulin | placebo/standard care                 |                 | 133  |                            |                                           |                      |                        |                                   |
|                            |                                       | Sakoulas        | 33   | low risk of bias           | high risk of bias                         | low risk of bias     | high risk of bias      | probably low risk of bias         |
|                            |                                       | Raman           | 100  | probably high risk of bias | probably high risk of bias                | low risk of bias     | high risk of bias      | probably low risk of bias         |
| placebo/standard care      | therapeutic plasma exchange           |                 | 87   |                            |                                           |                      |                        |                                   |
|                            |                                       | Faqihi          | 87   | low risk of bias           | probably high risk of bias                | low risk of bias     | low risk of bias       | low risk of bias                  |
| placebo/standard care      | umbilical cord mesenchymal stem cells |                 | 20   |                            |                                           |                      |                        |                                   |
|                            |                                       | Adas            | 20   | probably high risk of bias | probably high risk of bias                | low risk of bias     | high risk of bias      | probably low risk of bias         |



## Allergic reaction

| Treatment 1                | Treatment 2                          | First author               | N                     | Randomization              | Deviations from the intended intervention | Missing outcome data | Measurement of outcome | Selection of the reported results |
|----------------------------|--------------------------------------|----------------------------|-----------------------|----------------------------|-------------------------------------------|----------------------|------------------------|-----------------------------------|
| CT-P59 monoclonal antibody | placebo/standard care                | Eom                        | 325                   | low risk of bias           | low risk of bias                          | low risk of bias     | low risk of bias       | low risk of bias                  |
|                            |                                      |                            | 325                   |                            |                                           |                      |                        |                                   |
| XAV-19                     | placebo/standard care                | Gaborit                    | 18                    | low risk of bias           | low risk of bias                          | low risk of bias     | low risk of bias       | low risk of bias                  |
|                            |                                      |                            | 18                    |                            |                                           |                      |                        |                                   |
| bamlanivimab               | bamlanivimab, etesevimab             | Gottlieb                   | 421                   | low risk of bias           | low risk of bias                          | low risk of bias     | low risk of bias       | low risk of bias                  |
|                            |                                      |                            | 421                   |                            |                                           |                      |                        |                                   |
| bamlanivimab               | placebo/standard care                |                            | 1231                  |                            |                                           |                      |                        |                                   |
|                            |                                      | Chen_1                     | 452                   | low risk of bias           | low risk of bias                          | low risk of bias     | low risk of bias       | low risk of bias                  |
|                            |                                      | Lundgren                   | 314                   | probably low risk of bias  | low risk of bias                          | low risk of bias     | low risk of bias       | low risk of bias                  |
|                            |                                      | Gottlieb                   | 465                   | low risk of bias           | low risk of bias                          | low risk of bias     | low risk of bias       | low risk of bias                  |
| bamlanivimab, etesevimab   | placebo/standard care                | Gottlieb                   | 268                   | low risk of bias           | low risk of bias                          | low risk of bias     | low risk of bias       | low risk of bias                  |
|                            |                                      |                            | 268                   |                            |                                           |                      |                        |                                   |
| casirivimab, imdevimab     | placebo/standard care                |                            | 17205                 |                            |                                           |                      |                        |                                   |
|                            |                                      | Weinreich_2_1              | 3325                  | probably low risk of bias  | low risk of bias                          | low risk of bias     | low risk of bias       | low risk of bias                  |
|                            |                                      | Weinreich_2_2              | 1667                  | probably low risk of bias  | low risk of bias                          | low risk of bias     | low risk of bias       | low risk of bias                  |
|                            |                                      | Weinreich_2_3              | 1337                  | probably low risk of bias  | low risk of bias                          | low risk of bias     | low risk of bias       | low risk of bias                  |
|                            |                                      | Horby_2                    | 9785                  | low risk of bias           | probably high risk of bias                | low risk of bias     | high risk of bias      | low risk of bias                  |
|                            |                                      | Weinreich_3                | 780                   | probably low risk of bias  | low risk of bias                          | low risk of bias     | low risk of bias       | low risk of bias                  |
|                            |                                      | O'Brien_1                  | 311                   | probably low risk of bias  | low risk of bias                          | low risk of bias     | low risk of bias       | low risk of bias                  |
| control plasma             | convalescent plasma                  |                            | 324                   |                            |                                           |                      |                        |                                   |
|                            |                                      | Bajpai                     | 29                    | low risk of bias           | probably high risk of bias                | low risk of bias     | high risk of bias      | probably low risk of bias         |
|                            |                                      | O'Donnell                  | 223                   | low risk of bias           | low risk of bias                          | low risk of bias     | low risk of bias       | probably low risk of bias         |
|                            |                                      | Bennett-Guerrer            | 72                    | low risk of bias           | low risk of bias                          | low risk of bias     | low risk of bias       | probably low risk of bias         |
| convalescent plasma        | intravenous immunoglobulin           | Gonzalez                   | 190                   | probably high risk of bias | probably high risk of bias                | low risk of bias     | high risk of bias      | probably low risk of bias         |
| convalescent plasma        | placebo/standard care                |                            | 15243                 |                            |                                           |                      |                        |                                   |
|                            |                                      | Li                         | 103                   | low risk of bias           | probably high risk of bias                | low risk of bias     | low risk of bias       | low risk of bias                  |
|                            |                                      | Libster                    | 158                   | probably low risk of bias  | low risk of bias                          | low risk of bias     | low risk of bias       | low risk of bias                  |
|                            |                                      | Simonovich                 | 333                   | low risk of bias           | low risk of bias                          | low risk of bias     | low risk of bias       | low risk of bias                  |
|                            |                                      | Horby_1                    | 11558                 | low risk of bias           | probably high risk of bias                | low risk of bias     | high risk of bias      | low risk of bias                  |
|                            |                                      | Hamdy Salman               | 30                    | low risk of bias           | probably high risk of bias                | low risk of bias     | high risk of bias      | probably low risk of bias         |
|                            |                                      | Estcourt                   | 1980                  | low risk of bias           | probably high risk of bias                | low risk of bias     | high risk of bias      | low risk of bias                  |
|                            |                                      | Bégin                      | 921                   | low risk of bias           | probably high risk of bias                | low risk of bias     | high risk of bias      | low risk of bias                  |
|                            |                                      | Sekine                     | 160                   | probably high risk of bias | probably high risk of bias                | low risk of bias     | high risk of bias      | low risk of bias                  |
|                            |                                      | intravenous immunoglobulin | placebo/standard care | Sakoulas                   | 33                                        | low risk of bias     | high risk of bias      | low risk of bias                  |
| placebo/standard care      | sotrovimab                           | Gupta                      | 583                   | low risk of bias           | low risk of bias                          | low risk of bias     | low risk of bias       | low risk of bias                  |
|                            |                                      |                            | 583                   |                            |                                           |                      |                        |                                   |
| placebo/standard care      | therapeutic plasma exchange          | Faqihi                     | 87                    | low risk of bias           | probably high risk of bias                | low risk of bias     | low risk of bias       | low risk of bias                  |
|                            |                                      |                            | 87                    |                            |                                           |                      |                        |                                   |
| placebo/standard care      | mbilical cord mesenchymal stem cells | Shu                        | 41                    | probably high risk of bias | probably high risk of bias                | low risk of bias     | high risk of bias      | probably low risk of bias         |

## Transfusion-related acute lung injury (TRALI)

| Treatment 1           | Treatment 2                           | First author  | N    | Randomization              | Deviations from the intended intervention | Missing outcome data | Measurement of outcome | Selection of the reported results |
|-----------------------|---------------------------------------|---------------|------|----------------------------|-------------------------------------------|----------------------|------------------------|-----------------------------------|
| convalescent plasma   | placebo/standard care                 |               | 1365 |                            |                                           |                      |                        |                                   |
|                       |                                       | Avendano-Sola | 81   | probably high risk of bias | probably high risk of bias                | low risk of bias     | high risk of bias      | low risk of bias                  |
|                       |                                       | Simonovich    | 333  | low risk of bias           | low risk of bias                          | low risk of bias     | low risk of bias       | low risk of bias                  |
|                       |                                       | Hamdy Salman  | 30   | low risk of bias           | probably high risk of bias                | low risk of bias     | high risk of bias      | probably low risk of bias         |
|                       |                                       | Bégin         | 921  | low risk of bias           | probably high risk of bias                | low risk of bias     | high risk of bias      | low risk of bias                  |
| placebo/standard care | umbilical cord mesenchymal stem cells |               | 41   |                            |                                           |                      |                        |                                   |

Shu 41 probably high risk of bias probably high risk of bias low risk of bias high risk of bias probably low risk of bias

#### Transfusion-associated circulatory overload (TACO)

| Treatment 1           | Treatment 2                           | First author | N    | Randomization              | Deviations from the intended intervention | Missing outcome data | Measurement of outcome | Selection of the reported results |
|-----------------------|---------------------------------------|--------------|------|----------------------------|-------------------------------------------|----------------------|------------------------|-----------------------------------|
| control plasma        | convalescent plasma                   |              | 223  |                            |                                           |                      |                        |                                   |
|                       |                                       | O'Donnell    | 223  | low risk of bias           | low risk of bias                          | low risk of bias     | low risk of bias       | probably low risk of bias         |
| convalescent plasma   | placebo/standard care                 |              | 1442 |                            |                                           |                      |                        |                                   |
|                       |                                       | Libster      | 158  | probably low risk of bias  | low risk of bias                          | low risk of bias     | low risk of bias       | low risk of bias                  |
|                       |                                       | Simonovich   | 333  | low risk of bias           | low risk of bias                          | low risk of bias     | low risk of bias       | low risk of bias                  |
|                       |                                       | Hamdy Salman | 30   | low risk of bias           | probably high risk of bias                | low risk of bias     | high risk of bias      | probably low risk of bias         |
|                       |                                       | Bégin        | 921  | low risk of bias           | probably high risk of bias                | low risk of bias     | high risk of bias      | low risk of bias                  |
| placebo/standard care | umbilical cord mesenchymal stem cells |              | 41   |                            |                                           |                      |                        |                                   |
|                       |                                       | Shu          | 41   | probably high risk of bias | probably high risk of bias                | low risk of bias     | high risk of bias      | probably low risk of bias         |

## Network plots

For all of the following network plots, the width of the lines is proportional to the inverse of the variance of the effect estimate for that comparison (i.e., the wider the line, the narrower the credible interval). The diameter of the node is proportional to the number of patients randomized to that intervention.

### NON-SEVERE COVID-19

#### Mortality

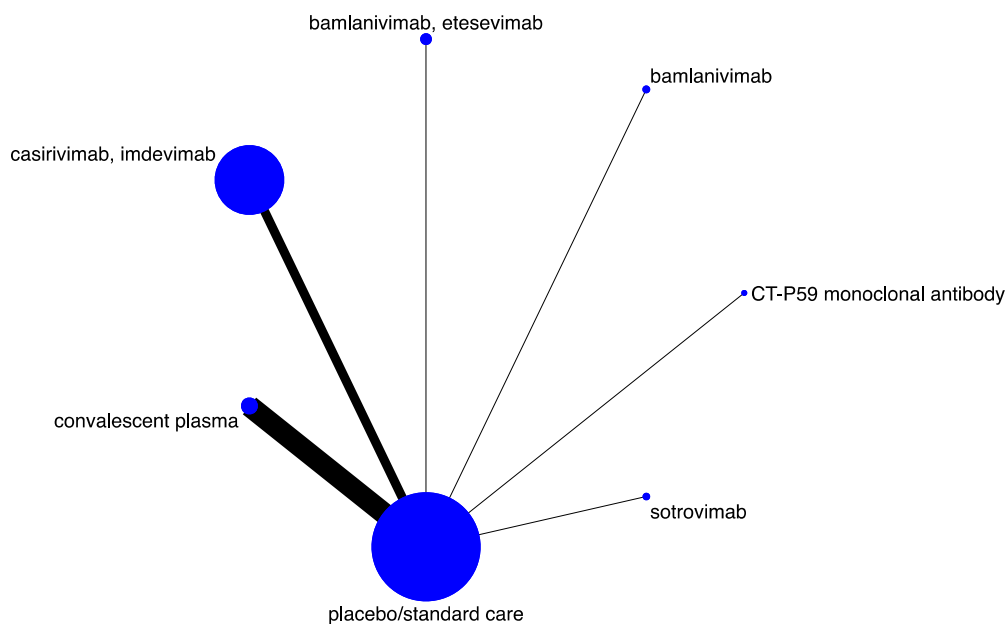

## Mechanical ventilation

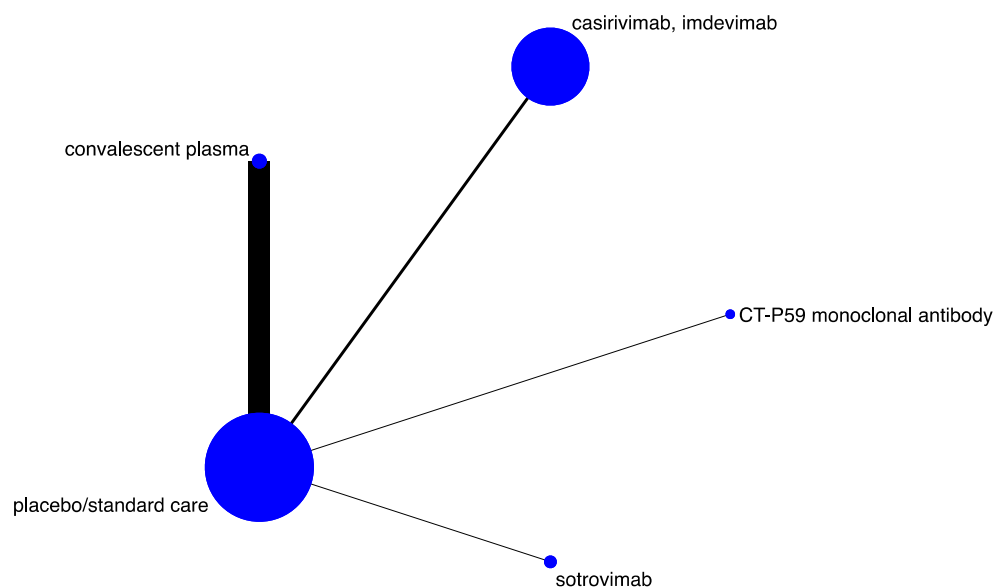

## Hospitalization

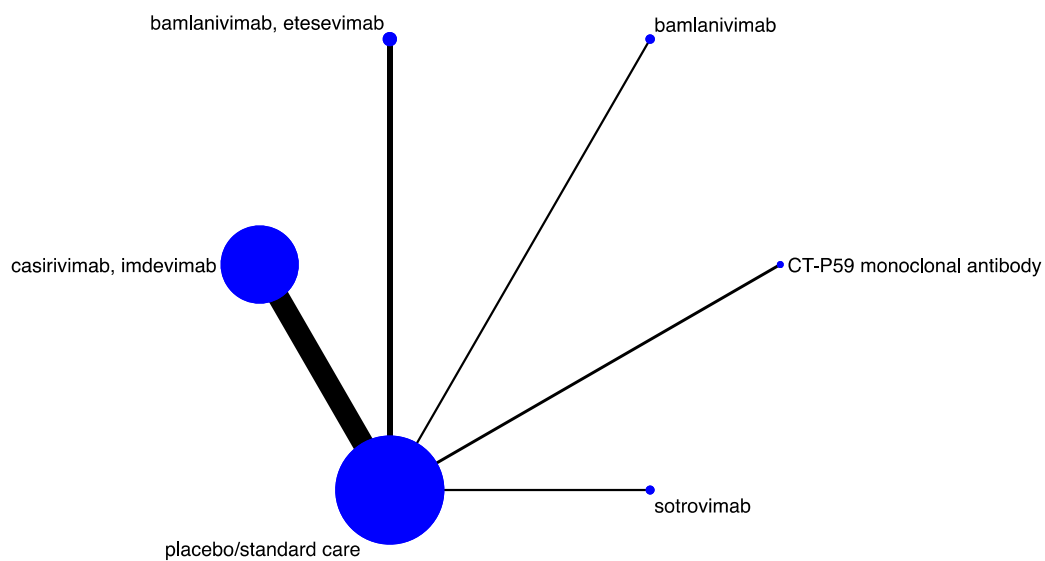

### Viral clearance at 7 days

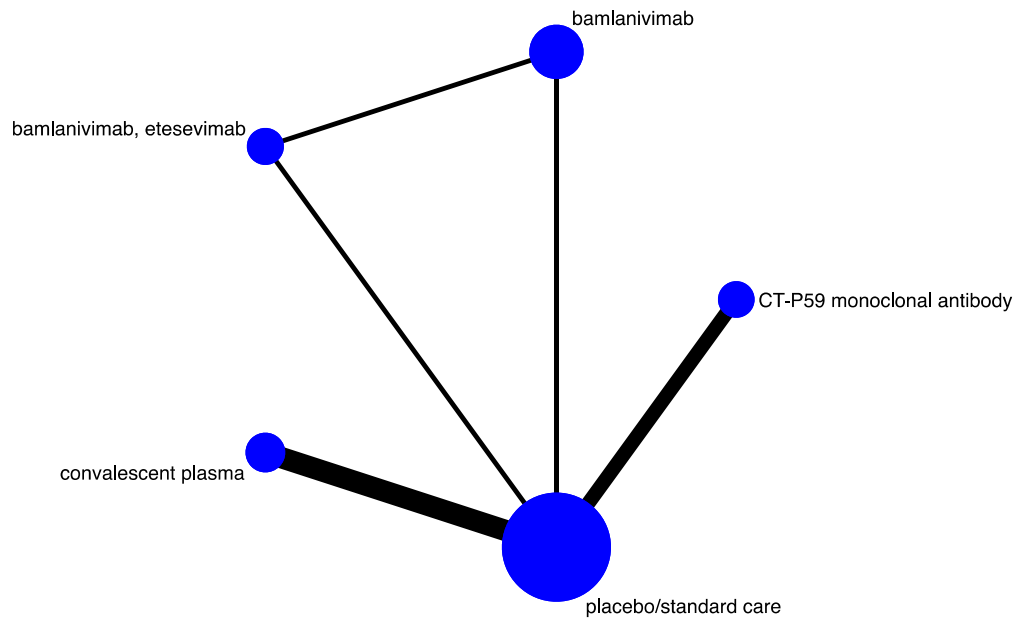

### Time to symptom resolution

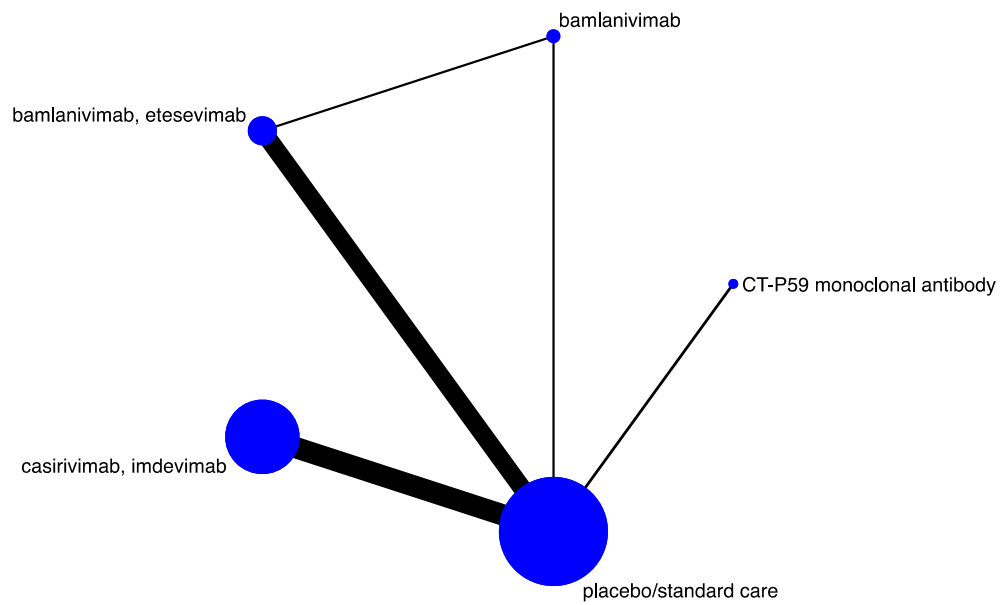

Time to viral clearance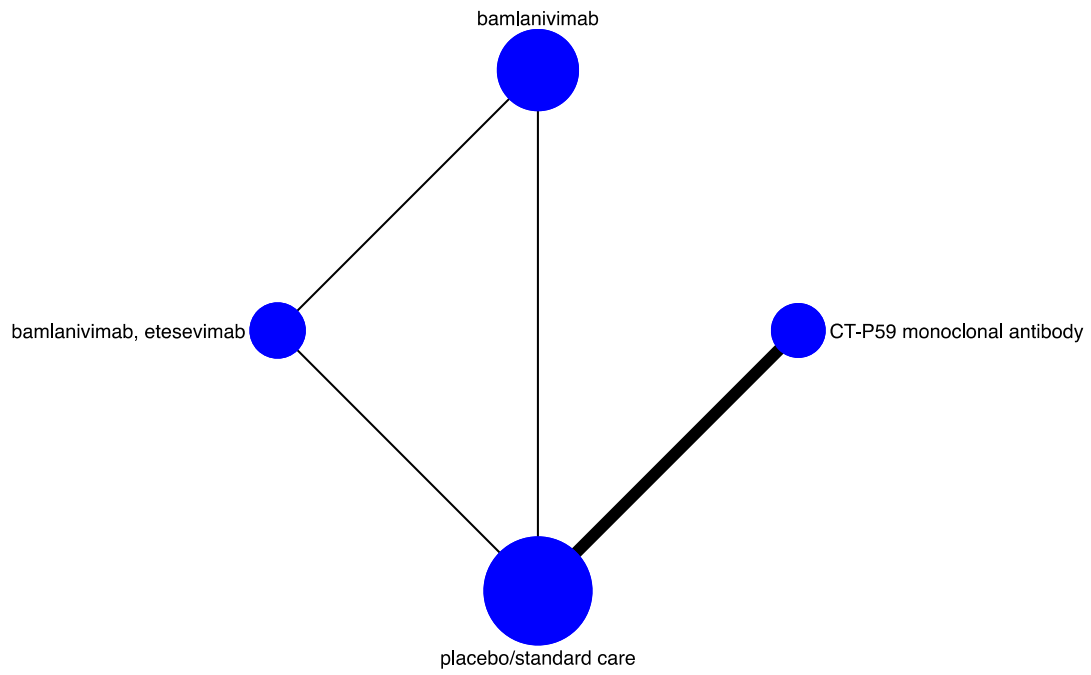

**SEVERE OR CRITICAL COVID-19**Mortality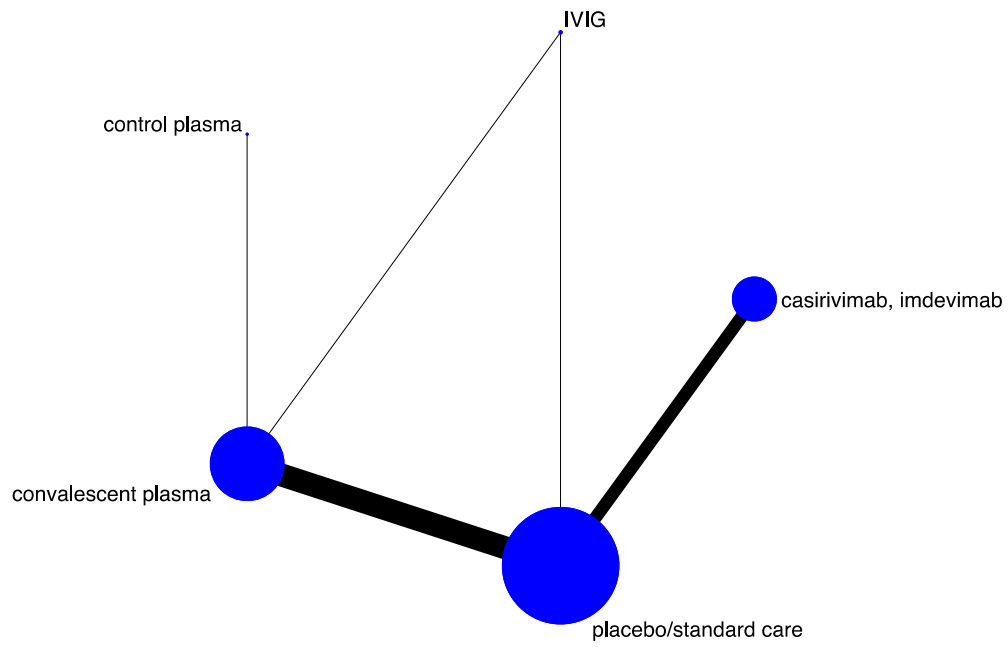

## Mechanical ventilation

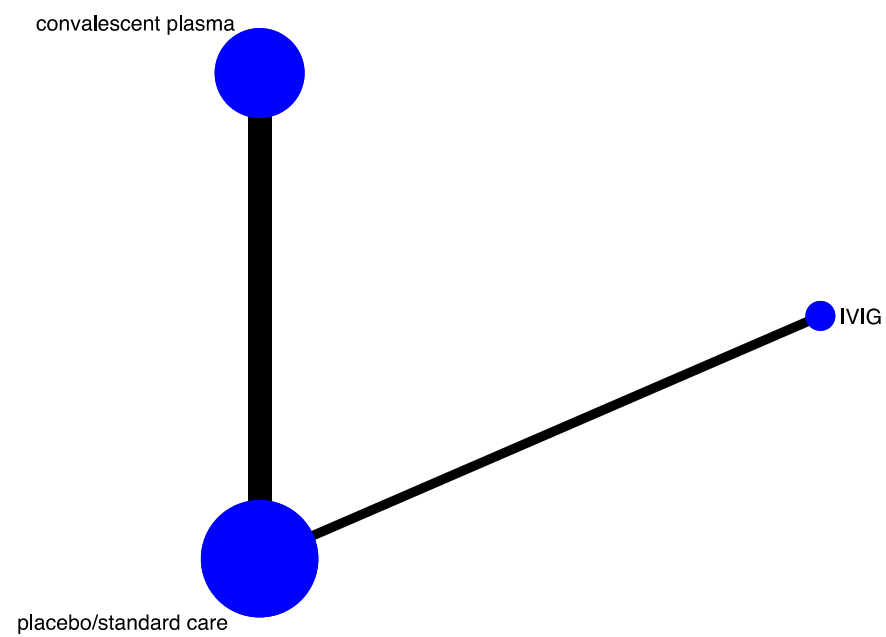

## Hospital length of stay

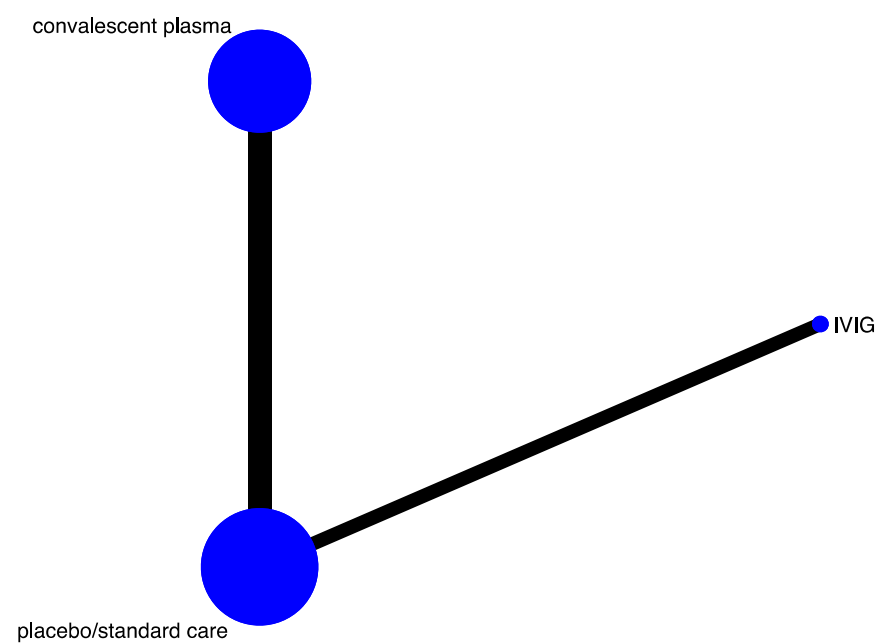



## ANY SEVERITY – ADVERSE EFFECTS

### Adverse effects leading to drug discontinuation

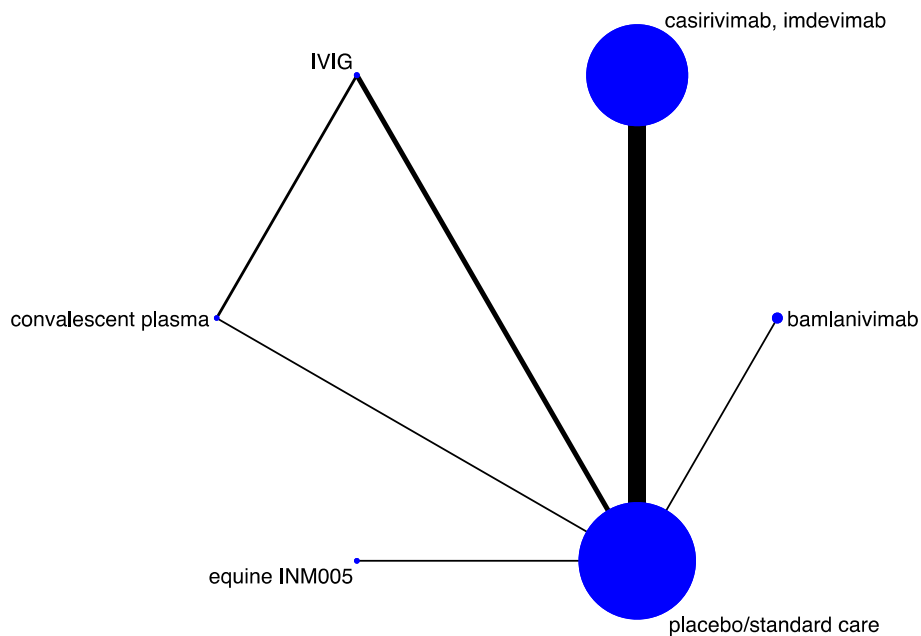

### Allergic reactions

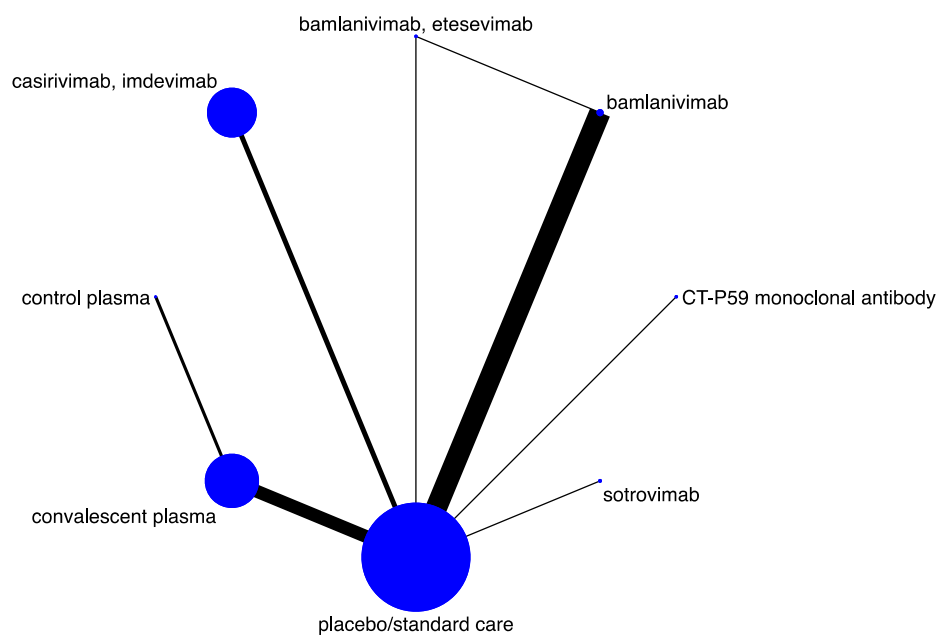

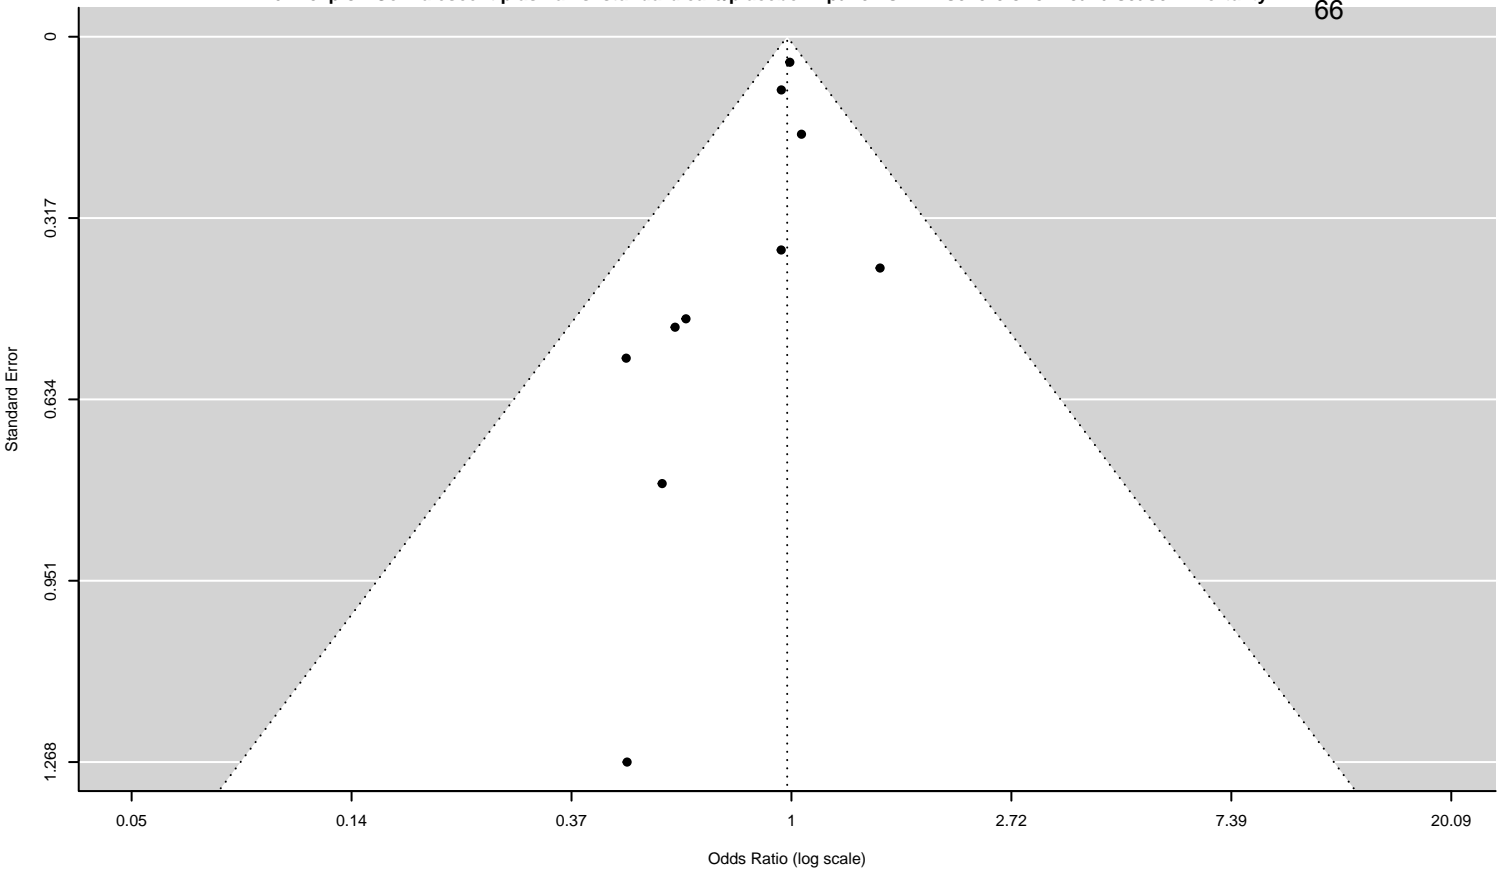



| #                                      | Intervention 1                                      | Intervention 2                                      | DIRECT ESTIMATES |                |                |                           |                |                |              | INDIRECT ESTIMATES |                |                |                           |                |                |              | NETWORK ESTIMATES |                |                |                           |                |                | Reasons  |                    |
|----------------------------------------|-----------------------------------------------------|-----------------------------------------------------|------------------|----------------|----------------|---------------------------|----------------|----------------|--------------|--------------------|----------------|----------------|---------------------------|----------------|----------------|--------------|-------------------|----------------|----------------|---------------------------|----------------|----------------|----------|--------------------|
|                                        |                                                     |                                                     | Relative effect  |                |                | Absolute effect per 1,000 |                |                | GRADE rating | Relative effect    |                |                | Absolute effect per 1,000 |                |                | GRADE rating | Relative effect   |                |                | Absolute effect per 1,000 |                |                |          | GRADE rating       |
|                                        |                                                     |                                                     | Point estimate   | CI lower limit | CI upper limit | Point estimate            | CI lower limit | CI upper limit |              | Point estimate     | CI lower limit | CI upper limit | Point estimate            | CI lower limit | CI upper limit |              | Point estimate    | CI lower limit | CI upper limit | Point estimate            | CI lower limit | CI upper limit |          |                    |
| <b>Adverse events (all-severities)</b> |                                                     |                                                     |                  |                |                |                           |                |                |              |                    |                |                |                           |                |                |              |                   |                |                |                           |                |                |          |                    |
| 1                                      | bamlanivimab                                        | placebo/standard care                               | NA               | NA             | NA             | -1.86                     | -12.45         | 8.74           | MODERATE     | NA                 | NA             | NA             | NA                        | NA             | NA             | NA           | NA                | NA             | NA             | -1.86                     | -12.49         | 8.76           | VERY LOW | Imprecision        |
| 2                                      | casirivimab, imdevimab                              | placebo/standard care                               | NA               | NA             | NA             | -1.62                     | -3.60          | 0.36           | LOW          | NA                 | NA             | NA             | NA                        | NA             | NA             | NA           | NA                | NA             | NA             | -1.62                     | -3.61          | 0.35           | LOW      | Imprecisionx2      |
| 3                                      | convalescent plasma                                 | placebo/standard care                               | NA               | NA             | NA             | -0.17                     | -36.64         | 36.29          | VERY LOW     | NA                 | NA             | NA             | 8.67                      | -60.42         | 77.72          | VERY LOW     | NA                | NA             | NA             | 1.69                      | -30.64         | 33.97          | VERY LOW | RoB, Imprecisionx3 |
| 4                                      | intravenous immunoglobulin                          | placebo/standard care                               | NA               | NA             | NA             | 29.53                     | -26.59         | 85.64          | VERY LOW     | NA                 | NA             | NA             | 20.56                     | -33.72         | 74.72          | VERY LOW     | NA                | NA             | NA             | 24.91                     | -14.32         | 63.94          | VERY LOW | RoB, Imprecisionx2 |
| 5                                      | purified equine anti-RBD F(ab')2 fragments (INM005) | placebo/standard care                               | NA               | NA             | NA             | 0.17                      | -15.81         | 16.14          | VERY LOW     | NA                 | NA             | NA             | NA                        | NA             | NA             | NA           | NA                | NA             | NA             | 0.18                      | -15.76         | 16.18          | VERY LOW | RoB, Imprecisionx3 |
| 6                                      | bamlanivimab                                        | casirivimab, imdevimab                              | NA               | NA             | NA             | NA                        | NA             | NA             | NA           | NA                 | NA             | NA             | -0.24                     | -11.06         | 10.58          | VERY LOW     | NA                | NA             | NA             | -0.24                     | -11.06         | 10.58          | VERY LOW | Imprecisionx3      |
| 7                                      | bamlanivimab                                        | convalescent plasma                                 | NA               | NA             | NA             | NA                        | NA             | NA             | NA           | NA                 | NA             | NA             | -3.60                     | -37.56         | 30.50          | VERY LOW     | NA                | NA             | NA             | -3.60                     | -37.56         | 30.50          | VERY LOW | RoB, Imprecisionx3 |
| 8                                      | bamlanivimab                                        | intravenous immunoglobulin                          | NA               | NA             | NA             | NA                        | NA             | NA             | NA           | NA                 | NA             | NA             | -26.76                    | -67.19         | 13.86          | VERY LOW     | NA                | NA             | NA             | -26.76                    | -67.19         | 13.86          | VERY LOW | RoB, Imprecisionx3 |
| 9                                      | bamlanivimab                                        | purified equine anti-RBD F(ab')2 fragments (INM005) | NA               | NA             | NA             | NA                        | NA             | NA             | NA           | NA                 | NA             | NA             | -2.05                     | -21.30         | 17.11          | VERY LOW     | NA                | NA             | NA             | -2.05                     | -21.30         | 17.11          | VERY LOW | RoB, Imprecisionx3 |
| 10                                     | casirivimab, imdevimab                              | convalescent plasma                                 | NA               | NA             | NA             | NA                        | NA             | NA             | NA           | NA                 | NA             | NA             | -3.33                     | -35.60         | 29.07          | VERY LOW     | NA                | NA             | NA             | -3.33                     | -35.60         | 29.07          | VERY LOW | RoB, Imprecisionx3 |
| 11                                     | casirivimab, imdevimab                              | intravenous immunoglobulin                          | NA               | NA             | NA             | NA                        | NA             | NA             | NA           | NA                 | NA             | NA             | -26.50                    | -65.59         | 12.78          | VERY LOW     | NA                | NA             | NA             | -26.50                    | -65.59         | 12.78          | VERY LOW | RoB, Imprecisionx2 |

| #                                          | Intervention 1             | Intervention 2                                    | DIRECT ESTIMATES |                |                |                           |                |                |              | INDIRECT ESTIMATES |                |                |                           |                |                |              | NETWORK ESTIMATES |                |                |                           |                |                | Reasons  |                   |
|--------------------------------------------|----------------------------|---------------------------------------------------|------------------|----------------|----------------|---------------------------|----------------|----------------|--------------|--------------------|----------------|----------------|---------------------------|----------------|----------------|--------------|-------------------|----------------|----------------|---------------------------|----------------|----------------|----------|-------------------|
|                                            |                            |                                                   | Relative effect  |                |                | Absolute effect per 1,000 |                |                | GRADE rating | Relative effect    |                |                | Absolute effect per 1,000 |                |                | GRADE rating | Relative effect   |                |                | Absolute effect per 1,000 |                |                |          | GRADE rating      |
|                                            |                            |                                                   | Point estimate   | CI lower limit | CI upper limit | Point estimate            | CI lower limit | CI upper limit |              | Point estimate     | CI lower limit | CI upper limit | Point estimate            | CI lower limit | CI upper limit |              | Point estimate    | CI lower limit | CI upper limit | Point estimate            | CI lower limit | CI upper limit |          |                   |
| 12                                         | casirivimab, imdevimab     | puried equine anti-RBD F(ab')2 fragments (INM005) | NA               | NA             | NA             | NA                        | NA             | NA             | NA           | NA                 | NA             | NA             | -1.81                     | -17.92         | 14.25          | VERY LOW     | NA                | NA             | NA             | -1.81                     | -17.92         | 14.25          | VERY LOW | RoB, Imprecision3 |
| 13                                         | intravenous immunoglobulin | convalescent plasma                               | NA               | NA             | NA             | 20.77                     | -19.50         | 61.05          | VERY LOW     | NA                 | NA             | NA             | 29.58                     | -37.64         | 96.29          | VERY LOW     | NA                | NA             | NA             | 23.20                     | -11.52         | 57.67          | VERY LOW | RoB, Imprecision3 |
| 14                                         | convalescent plasma        | puried equine anti-RBD F(ab')2 fragments (INM005) | NA               | NA             | NA             | NA                        | NA             | NA             | NA           | NA                 | NA             | NA             | 1.55                      | -34.73         | 37.51          | VERY LOW     | NA                | NA             | NA             | 1.55                      | -34.73         | 37.51          | VERY LOW | RoB, Imprecision3 |
| 15                                         | intravenous immunoglobulin | puried equine anti-RBD F(ab')2 fragments (INM005) | NA               | NA             | NA             | NA                        | NA             | NA             | NA           | NA                 | NA             | NA             | 24.75                     | -17.53         | 66.92          | VERY LOW     | NA                | NA             | NA             | 24.75                     | -17.53         | 66.92          | VERY LOW | RoB, Imprecision3 |
| <b>Infusion reactions (all severities)</b> |                            |                                                   |                  |                |                |                           |                |                |              |                    |                |                |                           |                |                |              |                   |                |                |                           |                |                |          |                   |
| 1                                          | bamlanivimab               | placebo/standard care                             | 1.75             | 0.74           | 4.19           | 1.67                      | -0.58          | 7.10           | LOW          | NA                 | NA             | NA             | NA                        | NA             | NA             | NA           | 1.84              | 0.74           | 5.26           | 2.57                      | -0.62          | 9.80           | Moderate | Imprecision       |
| 2                                          | bamlanivimab, etesevimab   | placebo/standard care                             | 2.82             | 0.19           | 41.65          | 4.06                      | -1.82          | 83.52          | VERY LOW     | NA                 | NA             | NA             | NA                        | NA             | NA             | NA           | 1.68              | 0.17           | 12.94          | 4.53                      | -1.89          | 27.13          | LOW      | Imprecision2      |
| 3                                          | casirivimab, imdevimab     | placebo/standard care                             | 1.93             | 0.48           | 7.66           | 2.09                      | -1.16          | 14.72          | LOW          | NA                 | NA             | NA             | NA                        | NA             | NA             | NA           | 2.41              | 0.57           | 13.07          | 5.87                      | -1.00          | 28.77          | LOW      | Imprecision2      |
| 4                                          | convalescent plasma        | placebo/standard care                             | 2.07             | 0.82           | 5.22           | 2.40                      | -0.40          | 9.36           | LOW          | NA                 | NA             | NA             | NA                        | NA             | NA             | NA           | 3.25              | 1.27           | 9.30           | 6.22                      | 0.61           | 18.41          | Moderate | Imprecision       |
| 5                                          | CT-P59 monoclonal antibody | placebo/standard care                             | 0.25             | 0.02           | 3.73           | -1.68                     | -2.21          | 6.07           | LOW          | NA                 | NA             | NA             | NA                        | NA             | NA             | NA           | 0.20              | 0.00           | 3.67           | -0.70                     | -2.23          | 6.53           | LOW      | Imprecision2      |
| 6                                          | sotrovimab                 | placebo/standard care                             | 0.50             | 0.03           | 7.34           | -1.12                     | -2.17          | 14.02          | LOW          | NA                 | NA             | NA             | NA                        | NA             | NA             | NA           | 0.39              | 0.01           | 6.49           | 0.38                      | -2.22          | 13.61          | LOW      | Imprecision2      |
| 7                                          | placebo/standard care      | control plasma                                    | NA               | NA             | NA             | NA                        | NA             | NA             | NA           | 0.42               | 0.05           | 4.76           | -7.66                     | -44.61         | 1.82           | LOW          | 0.42              | 0.05           | 4.76           | -7.66                     | -44.61         | 1.82           | LOW      | Imprecision2      |
| 8                                          | bamlanivimab, etesevimab   | bamlanivimab                                      | 0.92             | 0.13           | 6.51           | NA                        | NA             | NA             | LOW          | NA                 |                |                |                           |                |                | NA           | 0.91              | 0.10           | 6.05           | 1.96                      | -6.69          | 22.65          | LOW      | Imprecision2      |
| 9                                          | bamlanivimab               | casirivimab, imdevimab                            | NA               | NA             | NA             | NA                        | NA             | NA             | NA           | 0.76               | 0.12           | 4.57           | -3.30                     | -26.48         | 7.36           | LOW          | 0.76              | 0.12           | 4.57           | -3.30                     | -26.48         | 7.36           | LOW      | Imprecision2      |

| #  | Intervention 1            | Intervention 2             | DIRECT ESTIMATES |                |                |                           |                |                |              | INDIRECT ESTIMATES |                |                |                           |                |                |              | NETWORK ESTIMATES |                |                |                           |                |                | Reasons  |                |
|----|---------------------------|----------------------------|------------------|----------------|----------------|---------------------------|----------------|----------------|--------------|--------------------|----------------|----------------|---------------------------|----------------|----------------|--------------|-------------------|----------------|----------------|---------------------------|----------------|----------------|----------|----------------|
|    |                           |                            | Relative effect  |                |                | Absolute effect per 1,000 |                |                | GRADE rating | Relative effect    |                |                | Absolute effect per 1,000 |                |                | GRADE rating | Relative effect   |                |                | Absolute effect per 1,000 |                |                |          | GRADE rating   |
|    |                           |                            | Point estimate   | CI lower limit | CI upper limit | Point estimate            | CI lower limit | CI upper limit |              | Point estimate     | CI lower limit | CI upper limit | Point estimate            | CI lower limit | CI upper limit |              | Point estimate    | CI lower limit | CI upper limit | Point estimate            | CI lower limit | CI upper limit |          |                |
| 10 | bamlanivimab              | control plasma             | NA               | NA             | NA             | NA                        | NA             | NA             | NA           | 0.78               | 0.07           | 11.25          | -5.08                     | -42.07         | 7.93           | LOW          | 0.78              | 0.07           | 11.25          | -5.08                     | -42.07         | 7.93           | LOW      | Imprecisi onx2 |
| 11 | bamlanivimab              | convalescent plasma        | NA               | NA             | NA             | NA                        | NA             | NA             | NA           | 0.57               | 0.14           | 2.32           | -3.64                     | -16.11         | 5.54           | LOW          | 0.57              | 0.14           | 2.32           | -3.64                     | -16.11         | 5.54           | LOW      | Imprecisi onx2 |
| 12 | bamlanivimab              | CT-P59 monoclonal antibody | NA               | NA             | NA             | NA                        | NA             | NA             | NA           | 9.39               | 0.44           | 445.86         | 3.27                      | -4.52          | 11.13          | VERY LOW     | 9.39              | 0.44           | 445.86         | 3.27                      | -4.52          | 11.13          | VERY LOW | Imprecisi onx3 |
| 13 | bamlanivimab              | sotrovimab                 | NA               | NA             | NA             | NA                        | NA             | NA             | NA           | 4.76               | 0.25           | 200.34         | 2.19                      | -11.28         | 10.63          | VERY LOW     | 4.76              | 0.25           | 200.34         | 2.19                      | -11.28         | 10.63          | VERY LOW | Imprecisi onx3 |
| 14 | bamlanivimab , etesevimab | casirivimab, imdevimab     | NA               | NA             | NA             | NA                        | NA             | NA             | NA           | 0.68               | 0.04           | 8.67           | -1.34                     | -26.00         | 23.19          | LOW          | 0.68              | 0.04           | 8.67           | -1.34                     | -26.00         | 23.19          | LOW      | Imprecisi onx2 |
| 15 | bamlanivimab , etesevimab | control plasma             | NA               | NA             | NA             | NA                        | NA             | NA             | NA           | 0.70               | 0.03           | 17.99          | -3.13                     | -41.47         | 22.77          | LOW          | 0.70              | 0.03           | 17.99          | -3.13                     | -41.47         | 22.77          | LOW      | Imprecisi onx2 |
| 16 | bamlanivimab , etesevimab | convalescent plasma        | NA               | NA             | NA             | NA                        | NA             | NA             | NA           | 0.51               | 0.04           | 4.95           | -1.68                     | -16.37         | 21.48          | LOW          | 0.51              | 0.04           | 4.95           | -1.68                     | -16.37         | 21.48          | LOW      | Imprecisi onx2 |
| 17 | bamlanivimab , etesevimab | CT-P59 monoclonal antibody | NA               | NA             | NA             | NA                        | NA             | NA             | NA           | 8.33               | 0.22           | 578.25         | 5.23                      | -4.94          | 28.20          | VERY LOW     | 8.33              | 0.22           | 578.25         | 5.23                      | -4.94          | 28.20          | VERY LOW | Imprecisi onx3 |
| 18 | bamlanivimab , etesevimab | sotrovimab                 | NA               | NA             | NA             | NA                        | NA             | NA             | NA           | 4.26               | 0.12           | 254.68         | 4.15                      | -11.07         | 27.51          | VERY LOW     | 4.26              | 0.12           | 254.68         | 4.15                      | -11.07         | 27.51          | VERY LOW | Imprecisi onx3 |
| 19 | casirivimab, imdevimab    | control plasma             | NA               | NA             | NA             | NA                        | NA             | NA             | NA           | 1.04               | 0.08           | 18.73          | -1.79                     | -39.81         | 24.43          | LOW          | 1.04              | 0.08           | 18.73          | -1.79                     | -39.81         | 24.43          | LOW      | Imprecisi onx2 |
| 20 | casirivimab, imdevimab    | convalescent plasma        | NA               | NA             | NA             | NA                        | NA             | NA             | NA           | 0.74               | 0.12           | 5.05           | -0.34                     | -15.28         | 23.32          | LOW          | 0.74              | 0.12           | 5.05           | -0.34                     | -15.28         | 23.32          | LOW      | Imprecisi onx2 |
| 21 | casirivimab, imdevimab    | CT-P59 monoclonal antibody | NA               | NA             | NA             | NA                        | NA             | NA             | NA           | 12.55              | 0.46           | 742.48         | 6.57                      | -3.67          | 29.71          | VERY LOW     | 12.55             | 0.46           | 742.48         | 6.57                      | -3.67          | 29.71          | VERY LOW | Imprecisi onx3 |
| 22 | casirivimab, imdevimab    | sotrovimab                 | NA               | NA             | NA             | NA                        | NA             | NA             | NA           | 6.36               | 0.26           | 307.97         | 5.49                      | -9.78          | 28.92          | VERY LOW     | 6.36              | 0.26           | 307.97         | 5.49                      | -9.78          | 28.92          | VERY LOW | Imprecisi onx3 |
| 23 | convalescent plasma       | control plasma             | 0.94             | 0.17           | 5.16           | NA                        | NA             | NA             | LOW          | NA                 | NA             | NA             | NA                        | NA             | NA             | NA           | 1.36              | 0.21           | 12.81          | -1.44                     | -34.56         | 12.10          | LOW      | Imprecisi onx2 |
| 24 | control plasma            | CT-P59 monoclonal antibody | NA               | NA             | NA             | NA                        | NA             | NA             | NA           | 11.94              | 0.27           | 897.85         | 8.36                      | -4.19          | 45.39          | VERY LOW     | 11.94             | 0.27           | 897.85         | 8.36                      | -4.19          | 45.39          | VERY LOW | Imprecisi onx3 |
| 25 | control plasma            | sotrovimab                 | NA               | NA             | NA             | NA                        | NA             | NA             | NA           | 6.17               | 0.15           | 411.58         | 7.27                      | -10.22         | 44.65          | VERY LOW     | 6.17              | 0.15           | 411.58         | 7.27                      | -10.22         | 44.65          | VERY LOW | Imprecisi onx3 |

| #                                        | Intervention 1             | Intervention 2             | DIRECT ESTIMATES |                |                |                           |                |                |              | INDIRECT ESTIMATES |                |                |                           |                |                |              | NETWORK ESTIMATES |                |                |                           |                |                | Reasons  |                                  |                   |
|------------------------------------------|----------------------------|----------------------------|------------------|----------------|----------------|---------------------------|----------------|----------------|--------------|--------------------|----------------|----------------|---------------------------|----------------|----------------|--------------|-------------------|----------------|----------------|---------------------------|----------------|----------------|----------|----------------------------------|-------------------|
|                                          |                            |                            | Relative effect  |                |                | Absolute effect per 1,000 |                |                | GRADE rating | Relative effect    |                |                | Absolute effect per 1,000 |                |                | GRADE rating | Relative effect   |                |                | Absolute effect per 1,000 |                |                |          | GRADE rating                     |                   |
|                                          |                            |                            | Point estimate   | CI lower limit | CI upper limit | Point estimate            | CI lower limit | CI upper limit |              | Point estimate     | CI lower limit | CI upper limit | Point estimate            | CI lower limit | CI upper limit |              | Point estimate    | CI lower limit | CI upper limit | Point estimate            | CI lower limit | CI upper limit |          |                                  |                   |
| 26                                       | convalescent plasma        | CT-P59 monoclonal antibody | NA               | NA             | NA             | NA                        | NA             | NA             | NA           | 16.61              | 0.75           | 804.32         | 6.92                      | -2.06          | 19.68          | VERY LOW     | 16.61             | 0.75           | 804.32         | 6.92                      | -2.06          | 19.68          | VERY LOW | Imprecision3                     |                   |
| 27                                       | convalescent plasma        | sotrovimab                 | NA               | NA             | NA             | NA                        | NA             | NA             | NA           | 8.41E+00           | 0.44           | 343.78         | 5.83                      | -8.54          | 19.13          | VERY LOW     | 8.41              | 0.44           | 343.78         | 5.83                      | -8.54          | 19.13          | VERY LOW | Imprecision3                     |                   |
| 28                                       | CT-P59 monoclonal antibody | sotrovimab                 | NA               | NA             | NA             | NA                        | NA             | NA             | NA           | 5.07E-01           | 0.00           | 50.91          | -1.08                     | -14.67         | 7.35           | VERY LOW     | 0.51              | 0.00           | 50.91          | -1.08                     | -14.67         | 7.35           | VERY LOW | Imprecision3                     |                   |
| Duration of hospitalization (non-severe) |                            |                            |                  |                |                |                           |                |                |              |                    |                |                |                           |                |                |              |                   |                |                |                           |                |                |          |                                  |                   |
| 1                                        | convalescent plasma        | placebo/standard care      | -4.06            | -9.62          | 1.33           | NA                        | NA             | NA             | VERY LOW     | NA                 | NA             | NA             | NA                        | NA             | NA             | NA           | NA                | NA             | NA             | NA                        | NA             | NA             | NA       | NA                               | RoB, Imprecision2 |
| Duration of hospitalization (severe)     |                            |                            |                  |                |                |                           |                |                |              |                    |                |                |                           |                |                |              |                   |                |                |                           |                |                |          |                                  |                   |
| 1                                        | convalescent plasma        | placebo/standard care      | -0.71            | -2.26          | 0.97           | NA                        | NA             | NA             | LOW          | NA                 | NA             | NA             | NA                        | NA             | NA             | NA           | -0.42             | -3.30          | 2.51           | NA                        | NA             | NA             | VERY LOW | RoB, Imprecision                 |                   |
| 2                                        | intravenous immunoglobulin | placebo/standard care      | -2.07            | -6.63          | 2.45           | NA                        | NA             | NA             | VERY LOW     | NA                 | NA             | NA             | NA                        | NA             | NA             | NA           | -2.06             | -5.78          | 1.61           | NA                        | NA             | NA             | VERY LOW | RoB, Inconsistency, Imprecision2 |                   |
| 3                                        | convalescent plasma        | intravenous immunoglobulin | NA               | NA             | NA             | NA                        | NA             | NA             | NA           | 1.65               | -3.03          | 6.40           | NA                        | NA             | NA             | VERY LOW     | 1.65              | -3.03          | 6.40           | NA                        | NA             | NA             | VERY LOW | RoB, Inconsistency, Imprecision2 |                   |
| Mechanical ventilation (non-severe)      |                            |                            |                  |                |                |                           |                |                |              |                    |                |                |                           |                |                |              |                   |                |                |                           |                |                |          |                                  |                   |
| 1                                        | casirivimab, imdevimab     | placebo/standard care      | 0.27             | 0.05           | 1.55           | -4.98                     | -6.52          | 3.76           | LOW          | NA                 | NA             | NA             | NA                        | NA             | NA             | NA           | 0.21              | 0.02           | 1.20           | -4.01                     | -5.86          | 1.63           | LOW      | Imprecision2                     |                   |
| 2                                        | convalescent plasma        | placebo/standard care      | 0.82             | 0.29           | 2.02           | -1.24                     | -4.82          | 6.88           | VERY LOW     | NA                 | NA             | NA             | NA                        | NA             | NA             | NA           | 0.71              | 0.18           | 1.77           | -1.33                     | -4.96          | 4.43           | VERY LOW | RoB, Imprecision2                |                   |
| 3                                        | CT-P59 monoclonal antibody | placebo/standard care      | 1.53             | 0.05           | 45.43          | 3.56                      | -6.50          | 231.72         | VERY LOW     | NA                 | NA             | NA             | NA                        | NA             | NA             | NA           | 814,231.50        | 0.31           | 254331494377   | 736.17                    | -3.62          | 994.00         | VERY LOW | Imprecision                      |                   |

| #  | Intervention 1             | Intervention 2             | DIRECT ESTIMATES |                |                |                           |                |                |              | INDIRECT ESTIMATES       |                |                                                                      |                           |                |                |              | NETWORK ESTIMATES        |                |                                                                      |                           |                |                | Reasons  |                    |
|----|----------------------------|----------------------------|------------------|----------------|----------------|---------------------------|----------------|----------------|--------------|--------------------------|----------------|----------------------------------------------------------------------|---------------------------|----------------|----------------|--------------|--------------------------|----------------|----------------------------------------------------------------------|---------------------------|----------------|----------------|----------|--------------------|
|    |                            |                            | Relative effect  |                |                | Absolute effect per 1,000 |                |                | GRADE rating | Relative effect          |                |                                                                      | Absolute effect per 1,000 |                |                | GRADE rating | Relative effect          |                |                                                                      | Absolute effect per 1,000 |                |                |          | GRADE rating       |
|    |                            |                            | Point estimate   | CI lower limit | CI upper limit | Point estimate            | CI lower limit | CI upper limit |              | Point estimate           | CI lower limit | CI upper limit                                                       | Point estimate            | CI lower limit | CI upper limit |              | Point estimate           | CI lower limit | CI upper limit                                                       | Point estimate            | CI lower limit | CI upper limit |          |                    |
|    |                            |                            |                  |                |                |                           |                |                |              |                          |                |                                                                      |                           |                |                |              |                          |                | 4547<br>456                                                          |                           |                |                |          |                    |
| 4  | sotrovimab                 | placebo/standard care      | 0.20             | 0.01           | 5.07           | -5.48                     | -6.80          | 26.92          | LOW          | NA                       | NA             | NA                                                                   | NA                        | NA             | NA             | NA           | 0.00                     | 0.00           | 0.27                                                                 | -5.75                     | -6.00          | -4.25          | VERY LOW | Imprecisionx2      |
| 5  | casirivimab, imdevimab     | convalescent plasma        | NA               | NA             | NA             | NA                        | NA             | NA             | NA           | 0.30                     | 0.03           | 2.83                                                                 | -2.68                     | -9.04          | 4.06           | VERY LOW     | 0.30                     | 0.03           | 2.83                                                                 | -2.68                     | -9.04          | 4.06           | VERY LOW | RoB, Imprecisionx2 |
| 6  | casirivimab, imdevimab     | CT-P59 monoclonal antibody | NA               | NA             | NA             | NA                        | NA             | NA             | NA           | 0.00                     | 0.00           | 0.85                                                                 | -740.19                   | -999.73        | -0.77          | VERY LOW     | 0.00                     | 0.00           | 0.85                                                                 | -740.19                   | -999.73        | -0.77          | VERY LOW | Imprecisionx3      |
| 7  | casirivimab, imdevimab     | sotrovimab                 | NA               | NA             | NA             | NA                        | NA             | NA             | NA           | 3982478<br>4.40          | 0.62           | 1989<br>6480<br>5864<br>3900<br>0000<br>0000<br>0.00                 | 1.73                      | -0.45          | 7.49           | VERY LOW     | 39,824,7<br>84.40        | 0.62           | 1,989<br>,648,<br>058,6<br>43,90<br>0,000<br>,000,<br>000.0<br>0     | 1.73                      | -0.45          | 7.49           | VERY LOW | Imprecisionx3      |
| 8  | convalescent plasma        | CT-P59 monoclonal antibody | NA               | NA             | NA             | NA                        | NA             | NA             | NA           | 0.00                     | 0.00           | 2.44                                                                 | -737.51                   | -998.44        | 1.77           | VERY LOW     | 0.00                     | 0.00           | 2.44                                                                 | -737.51                   | -998.44        | 1.77           | VERY LOW | RoB, Imprecisionx2 |
| 9  | convalescent plasma        | sotrovimab                 | NA               | NA             | NA             | NA                        | NA             | NA             | NA           | 1309073<br>00.38         | 2.23           | 5977<br>2330<br>9738<br>8960<br>0000<br>0000<br>0.00                 | 4.41                      | 0.58           | 10.36          | VERY LOW     | 130,907,<br>300.38       | 2.23           | 5,977<br>,233,<br>097,3<br>88,96<br>0,000<br>,000,<br>000.0<br>0     | 4.41                      | 0.58           | 10.36          | VERY LOW | RoB, Imprecisionx3 |
| 10 | CT-P59 monoclonal antibody | sotrovimab                 | NA               | NA             | NA             | NA                        | NA             | NA             | NA           | 2413851<br>5011150<br>33 | 1,002<br>.25   | 1,867<br>,670,<br>497,7<br>80,59<br>0,000<br>,000,<br>000,0<br>00,00 | 741.92                    | 2.21           | 1000.<br>00    | VERY LOW     | 2413851<br>5011150<br>33 | 1,002<br>.25   | 1,867<br>,670,<br>497,7<br>80,59<br>0,000<br>,000,<br>000,0<br>00,00 | 741.92                    | 2.21           | 1000.0<br>0    | VERY LOW | Imprecisionx3      |



| #                                      | Intervention 1             | Intervention 2             | DIRECT ESTIMATES |                |                |                           |                |                |              | INDIRECT ESTIMATES |                |                |                           |                |                |              | NETWORK ESTIMATES |                |                |                           |                |                | Reasons  |                               |
|----------------------------------------|----------------------------|----------------------------|------------------|----------------|----------------|---------------------------|----------------|----------------|--------------|--------------------|----------------|----------------|---------------------------|----------------|----------------|--------------|-------------------|----------------|----------------|---------------------------|----------------|----------------|----------|-------------------------------|
|                                        |                            |                            | Relative effect  |                |                | Absolute effect per 1,000 |                |                | GRADE rating | Relative effect    |                |                | Absolute effect per 1,000 |                |                | GRADE rating | Relative effect   |                |                | Absolute effect per 1,000 |                |                |          | GRADE rating                  |
|                                        |                            |                            | Point estimate   | CI lower limit | CI upper limit | Point estimate            | CI lower limit | CI upper limit |              | Point estimate     | CI lower limit | CI upper limit | Point estimate            | CI lower limit | CI upper limit |              | Point estimate    | CI lower limit | CI upper limit | Point estimate            | CI lower limit | CI upper limit |          |                               |
|                                        |                            |                            |                  |                |                |                           |                |                |              |                    |                | 0,000.00       |                           |                |                |              |                   |                | 0,000.00       |                           |                |                |          |                               |
| <b>Mechanical ventilation (severe)</b> |                            |                            |                  |                |                |                           |                |                |              |                    |                |                |                           |                |                |              |                   |                |                |                           |                |                |          |                               |
| 1                                      | convalescent plasma        | placebo/standard care      | 0.95             | 0.54           | 1.62           | -11.26                    | -114.54        | 110.64         | VERY LOW     | NA                 | NA             | NA             | NA                        | NA             | NA             | NA           | 0.92              | 0.46           | 1.68           | -13.94                    | -135.43        | 115.36         | VERY LOW | RoB, Imprecision <sub>2</sub> |
| 2                                      | intravenous immunoglobulin | placebo/standard care      | 0.68             | 0.27           | 1.64           | -74.32                    | -199.28        | 113.59         | VERY LOW     | NA                 | NA             | NA             | NA                        | NA             | NA             | NA           | 0.67              | 0.29           | 1.45           | -70.25                    | -189.39        | 79.48          | VERY LOW | RoB, Imprecision <sub>2</sub> |
| 3                                      | convalescent plasma        | intravenous immunoglobulin | NA               | NA             | NA             | NA                        | NA             | NA             | NA           | 1.38               | 0.50           | 3.78           | 56.31                     | -135.95        | 233.93         | VERY LOW     | 1.38              | 0.50           | 3.78           | 56.31                     | -135.95        | 233.93         | VERY LOW | RoB, Imprecision <sub>2</sub> |
| <b>Mortality (non-severe)</b>          |                            |                            |                  |                |                |                           |                |                |              |                    |                |                |                           |                |                |              |                   |                |                |                           |                |                |          |                               |
| 1                                      | bamlanivimab               | placebo/standard care      | 0.46             | 0.01           | 27.79          | -1.82                     | -3.37          | 83.17          | LOW          | NA                 | NA             | NA             | NA                        | NA             | NA             | NA           | 8.19E-05          | 6.59E-41       | 3.98E+23       | 220.97                    | -3.40          | 996.60         | VERY LOW | Imprecision <sub>2</sub>      |
| 2                                      | bamlanivimab, etesevimab   | placebo/standard care      | 0.05             | 0.00           | 1.01           | -3.24                     | -3.39          | 0.05           | LOW          | NA                 | NA             | NA             | NA                        | NA             | NA             | NA           | 1.56E-24          | 1.10E-57       | 6.74E-07       | -3.39                     | -3.40          | -3.37          | VERY LOW | Imprecision <sub>2</sub>      |
| 3                                      | casirivimab, imdevimab     | placebo/standard care      | 0.58             | 0.26           | 1.22           | -1.43                     | -2.50          | 0.75           | MODERATE     | NA                 | NA             | NA             | NA                        | NA             | NA             | NA           | 0.54              | 0.20           | 1.13           | -1.45                     | -2.70          | 0.46           | LOW      | Imprecision                   |
| 4                                      | convalescent plasma        | placebo/standard care      | 0.83             | 0.43           | 1.46           | -0.58                     | -1.93          | 1.56           | MODERATE     | NA                 | NA             | NA             | NA                        | NA             | NA             | NA           | 0.79              | 0.35           | 1.32           | -0.70                     | -2.22          | 1.08           | VERY LOW | RoB                           |
| 5                                      | CT-P59 monoclonal antibody | placebo/standard care      | 0.51             | 0.01           | 30.40          | -1.68                     | -3.37          | 90.52          | LOW          | NA                 | NA             | NA             | NA                        | NA             | NA             | NA           | 0.14              | 4.59E-21       | 3.12E+36       | 174.83                    | -3.40          | 996.60         | VERY LOW | Imprecision <sub>2</sub>      |
| 6                                      | sotrovimab                 | placebo/standard care      | 0.33             | 0.01           | 10.16          | -2.26                     | -3.36          | 30.08          | LOW          | NA                 | NA             | NA             | NA                        | NA             | NA             | NA           | 9.15E-17          | 3.69E-45       | 0.03           | -3.28                     | -3.40          | -2.97          | VERY LOW | Imprecision <sub>2</sub>      |
| 7                                      | bamlanivimab               | bamlanivimab, etesevimab   | NA               | NA             | NA             | NA                        | NA             | NA             | NA           | 7.545E+19          | 6.90E-16       | 2.83E+50       | 224.37                    | -0.01          | 1000.00        | VERY LOW     | 7.545E+19         | 6.90E-16       | 2.83E+50       | 224.37                    | -0.01          | 1000.00        | VERY LOW | Imprecision <sub>3</sub>      |
| 8                                      | bamlanivimab               | casirivimab, imdevimab     | NA               | NA             | NA             | NA                        | NA             | NA             | NA           | 0.00               | 1.07E-40       | 7.54E+23       | 222.42                    | -3.60          | 998.74         | VERY LOW     | 0.00              | 1.07E-40       | 7.54E+23       | 222.42                    | -3.60          | 998.74         | VERY LOW | Imprecision <sub>3</sub>      |
| 9                                      | bamlanivimab               | convalescent plasma        | NA               | NA             | NA             | NA                        | NA             | NA             | NA           | 0.00               | 8.47E-41       | 5.11E+23       | 221.67                    | -4.27          | 998.04         | VERY LOW     | 0.00              | 8.47E-41       | 5.11E+23       | 221.67                    | -4.27          | 998.04         | VERY LOW | RoB, Imprecision <sub>3</sub> |
| 10                                     | bamlanivimab               | CT-P59 monoclonal antibody | NA               | NA             | NA             | NA                        | NA             | NA             | NA           | 2.49E-05           | 2.31E-41       | 1.38E+26       | 46.14                     | -              | 1000.00        | VERY LOW     | 2.49E-05          | 2.31E-41       | 1.38E+26       | 46.14                     | -              | 1000.00        | VERY LOW | Imprecision <sub>3</sub>      |

| #                         | Intervention 1             | Intervention 2             | DIRECT ESTIMATES |                |                |                           |                |                |              | INDIRECT ESTIMATES |                |                |                           |                |                |              | NETWORK ESTIMATES |                |                |                           |                |                | Reasons  |                    |
|---------------------------|----------------------------|----------------------------|------------------|----------------|----------------|---------------------------|----------------|----------------|--------------|--------------------|----------------|----------------|---------------------------|----------------|----------------|--------------|-------------------|----------------|----------------|---------------------------|----------------|----------------|----------|--------------------|
|                           |                            |                            | Relative effect  |                |                | Absolute effect per 1,000 |                |                | GRADE rating | Relative effect    |                |                | Absolute effect per 1,000 |                |                | GRADE rating | Relative effect   |                |                | Absolute effect per 1,000 |                |                |          | GRADE rating       |
|                           |                            |                            | Point estimate   | CI lower limit | CI upper limit | Point estimate            | CI lower limit | CI upper limit |              | Point estimate     | CI lower limit | CI upper limit | Point estimate            | CI lower limit | CI upper limit |              | Point estimate    | CI lower limit | CI upper limit | Point estimate            | CI lower limit | CI upper limit |          |                    |
| 11                        | bamlanivimab               | sotrovimab                 | NA               | NA             | NA             | NA                        | NA             | NA             | NA           | 4.6598E+12         | 4.10E-27       | 4.13E+66       | 224.25                    | -0.06          | 1000.00        | VERY LOW     | 4.6598E+12        | 4.10E-27       | 4.13E+66       | 224.25                    | -0.06          | 1000.00        | VERY LOW | Imprecisionx3      |
| 12                        | bamlanivimab, etesevimab   | casirivimab, imdevimab     | NA               | NA             | NA             | NA                        | NA             | NA             | NA           | 2.92E-24           | 2.74E-57       | 1.34E-06       | -1.95                     | -3.85          | -0.69          | VERY LOW     | 2.92E-24          | 2.74E-57       | 1.34E-06       | -1.95                     | -3.85          | -0.69          | VERY LOW | Imprecisionx3      |
| 13                        | bamlanivimab, etesevimab   | convalescent plasma        | NA               | NA             | NA             | NA                        | NA             | NA             | NA           | 2.04E-24           | 1.37E-57       | 8.92E-07       | -2.70                     | -4.47          | -1.17          | VERY LOW     | 2.04E-24          | 1.37E-57       | 8.92E-07       | -2.70                     | -4.47          | -1.17          | VERY LOW | RoB, Imprecisionx3 |
| 14                        | bamlanivimab, etesevimab   | CT-P59 monoclonal antibody | NA               | NA             | NA             | NA                        | NA             | NA             | NA           | 2.53E-23           | 4.86E-62       | 0.11           | -178.22                   | -              | 1000.00        | VERY LOW     | 2.53E-23          | 4.86E-62       | 0.11           | -178.22                   | -              | 1000.00        | VERY LOW | Imprecisionx3      |
| 15                        | bamlanivimab, etesevimab   | sotrovimab                 | NA               | NA             | NA             | NA                        | NA             | NA             | NA           | 1.57E-07           | 3.52E-46       | 5.74E+28       | -0.12                     | -0.43          | 0.03           | VERY LOW     | 1.57E-07          | 3.52E-46       | 5.74E+28       | -0.12                     | -0.43          | 0.03           | VERY LOW | Imprecisionx3      |
| 16                        | casirivimab, imdevimab     | convalescent plasma        | NA               | NA             | NA             | NA                        | NA             | NA             | NA           | 0.68               | 0.24           | 2.01           | -0.75                     | -2.92          | 1.64           | VERY LOW     | 0.68              | 0.24           | 2.01           | -0.75                     | -2.92          | 1.64           | VERY LOW | RoB, Imprecisionx2 |
| 17                        | casirivimab, imdevimab     | CT-P59 monoclonal antibody | NA               | NA             | NA             | NA                        | NA             | NA             | NA           | 3.67               | 1.71E-37       | 1.14E+20       | -176.28                   | -998.65        | 3.63           | VERY LOW     | 3.67              | 1.71E-37       | 1.14E+20       | -176.28                   | -998.65        | 3.63           | VERY LOW | Imprecisionx3      |
| 18                        | casirivimab, imdevimab     | sotrovimab                 | NA               | NA             | NA             | NA                        | NA             | NA             | NA           | 5.6476E+15         | 18.36          | 1.40E+44       | 1.83                      | 0.53           | 3.84           | VERY LOW     | 5.6476E+15        | 18.36          | 1.40E+44       | 1.83                      | 0.53           | 3.84           | VERY LOW | Imprecisionx3      |
| 19                        | convalescent plasma        | CT-P59 monoclonal antibody | NA               | NA             | NA             | NA                        | NA             | NA             | NA           | 5.26               | 2.42E-37       | 1.63E+20       | -175.53                   | -997.88        | 4.28           | VERY LOW     | 5.26              | 2.42E-37       | 1.63E+20       | -175.53                   | -997.88        | 4.28           | VERY LOW | RoB, Imprecisionx3 |
| 20                        | convalescent plasma        | sotrovimab                 | NA               | NA             | NA             | NA                        | NA             | NA             | NA           | 8.3413E+15         | 27.66          | 1.99E+44       | 2.58                      | 0.97           | 4.46           | VERY LOW     | 8.3413E+15        | 27.66          | 1.99E+44       | 2.58                      | 0.97           | 4.46           | VERY LOW | RoB, Imprecisionx3 |
| 21                        | CT-P59 monoclonal antibody | sotrovimab                 | NA               | NA             | NA             | NA                        | NA             | NA             | NA           | NA                 | NA             | NA             | NA                        | NA             | NA             | VERY LOW     | 1.6139E+16        | 7.30E-11       | 9.02E+62       | 178.11                    | -0.20          | 1000.00        | VERY LOW | Imprecisionx3      |
| <b>Mortality (severe)</b> |                            |                            |                  |                |                |                           |                |                |              |                    |                |                |                           |                |                |              |                   |                |                |                           |                |                |          |                    |
| 1                         | casirivimab, imdevimab     | placebo/standard care      | 0.95             | 0.29           | 3.07           | -9.47                     | -144.10        | 243.97         | VERY LOW     | NA                 | NA             | NA             | NA                        | NA             | NA             | NA           | 0.94              | 0.58           | 1.52           | -6.90                     | -78.55         | 82.22          | VERY LOW | RoB, Imprecisionx2 |
| 2                         | convalescent plasma        | placebo/standard care      | 0.95             | 0.76           | 1.15           | -8.25                     | -43.19         | 24.81          | VERY LOW     | 0.57               | 0.19           | 1.61           | -82.21                    | -168.78        | 92.40          | #N/A         | 0.92              | 0.70           | 1.12           | -14.38                    | -56.04         | 20.30          | VERY LOW | RoB                |

| #                                                                          | Intervention 1             | Intervention 2             | DIRECT ESTIMATES |                |                |                           |                |                |              | INDIRECT ESTIMATES |                |                |                           |                |                |              | NETWORK ESTIMATES |                |                |                           |                |                | Reasons  |                               |
|----------------------------------------------------------------------------|----------------------------|----------------------------|------------------|----------------|----------------|---------------------------|----------------|----------------|--------------|--------------------|----------------|----------------|---------------------------|----------------|----------------|--------------|-------------------|----------------|----------------|---------------------------|----------------|----------------|----------|-------------------------------|
|                                                                            |                            |                            | Relative effect  |                |                | Absolute effect per 1,000 |                |                | GRADE rating | Relative effect    |                |                | Absolute effect per 1,000 |                |                | GRADE rating | Relative effect   |                |                | Absolute effect per 1,000 |                |                |          | GRADE rating                  |
|                                                                            |                            |                            | Point estimate   | CI lower limit | CI upper limit | Point estimate            | CI lower limit | CI upper limit |              | Point estimate     | CI lower limit | CI upper limit | Point estimate            | CI lower limit | CI upper limit |              | Point estimate    | CI lower limit | CI upper limit | Point estimate            | CI lower limit | CI upper limit |          |                               |
| 3                                                                          | intravenous immunoglobulin | placebo/standard care      | 0.55             | 0.22           | 1.34           | -85.09                    | -162.45        | 54.50          | VERY LOW     | 0.92               | 0.39           | 2.03           | -14.31                    | -119.94        | 143.93         | VERY LOW     | 0.70              | 0.39           | 1.16           | -52.55                    | -119.13        | 29.22          | VERY LOW | RoB, Imprecision <sup>2</sup> |
| 4                                                                          | placebo/standard care      | control plasma             | NA               | NA             | NA             | NA                        | NA             | NA             | NA           | 0.57               | 0.25           | 1.30           | -118.44                   | -306.60        | 41.32          | VERY LOW     | 0.57              | 0.25           | 1.30           | -118.44                   | -306.60        | 41.32          | VERY LOW | RoB, Imprecision <sup>2</sup> |
| 5                                                                          | casirivimab, imdevimab     | control plasma             | NA               | NA             | NA             | NA                        | NA             | NA             | NA           | 0.53               | 0.21           | 1.40           | -125.34                   | -324.43        | 58.37          | VERY LOW     | 0.53              | 0.21           | 1.40           | -125.34                   | -324.43        | 58.37          | VERY LOW | RoB, Imprecision <sup>2</sup> |
| 6                                                                          | casirivimab, imdevimab     | convalescent plasma        | NA               | NA             | NA             | NA                        | NA             | NA             | NA           | 1.02               | 0.63           | 1.84           | 7.48                      | -67.69         | 110.10         | VERY LOW     | 1.02              | 0.63           | 1.84           | 7.48                      | -67.69         | 110.10         | VERY LOW | RoB, Imprecision <sup>2</sup> |
| 7                                                                          | casirivimab, imdevimab     | intravenous immunoglobulin | NA               | NA             | NA             | NA                        | NA             | NA             | NA           | 1.35               | 0.70           | 2.89           | 45.65                     | -58.52         | 160.60         | VERY LOW     | 1.35              | 0.70           | 2.89           | 45.65                     | -58.52         | 160.60         | VERY LOW | RoB, Imprecision <sup>2</sup> |
| 8                                                                          | convalescent plasma        | control plasma             | 0.55             | 0.19           | 1.65           | --                        | --             | --             | LOW          | NA                 | NA             | NA             | NA                        | NA             | NA             | NA           | 0.52              | 0.24           | 1.13           | -132.82                   | -314.58        | 17.74          | LOW      | Imprecision <sup>2</sup>      |
| 9                                                                          | control plasma             | intravenous immunoglobulin | NA               | NA             | NA             | NA                        | NA             | NA             | NA           | 2.53               | 1.00           | 6.49           | 171.00                    | -0.12          | 368.41         | LOW          | 2.53              | 1.00           | 6.49           | 171.00                    | -0.12          | 368.41         | LOW      | RoB, Imprecision              |
| 10                                                                         | intravenous immunoglobulin | convalescent plasma        | 0.98             | 0.27           | 3.55           | --                        | --             | --             | VERY LOW     | 0.59               | 0.27           | 1.25           | --                        | --             | --             | VERY LOW     | 0.76              | 0.44           | 1.28           | -38.17                    | -105.33        | 44.03          | VERY LOW | RoB, Imprecision <sup>2</sup> |
| <b>Transfusion-associated circulatory overload [TACO] (all severities)</b> |                            |                            |                  |                |                |                           |                |                |              |                    |                |                |                           |                |                |              |                   |                |                |                           |                |                |          |                               |
|                                                                            | convalescent plasma        | placebo/standard care      | NA               | NA             | NA             | 5.00                      | -3.00          | 12.00          | VERY LOW     | NA                 | NA             | NA             | NA                        | NA             | NA             | NA           | NA                | NA             | NA             | NA                        | NA             | NA             | NA       | RoB, Imprecision <sup>2</sup> |
| <b>Time to symptom resolution (non-severe)</b>                             |                            |                            |                  |                |                |                           |                |                |              |                    |                |                |                           |                |                |              |                   |                |                |                           |                |                |          |                               |
| 1                                                                          | bamlanivimab               | placebo/standard care      | 0.93             | 0.26           | 3.31           | -0.67                     | -6.67          | 20.78          | LOW          | NA                 | NA             | NA             | NA                        | NA             | NA             | NA           | 0.92              | 0.64           | 1.32           | -0.53                     | -3.18          | 2.95           | LOW      | Imprecision <sup>2</sup>      |
| 2                                                                          | bamlanivimab, etesevimab   | placebo/standard care      | 0.89             | 0.51           | 1.55           | -1.00                     | -4.41          | 4.95           | LOW          | NA                 | NA             | NA             | NA                        | NA             | NA             | NA           | 0.89              | 0.68           | 1.16           | -0.93                     | -2.88          | 1.45           | LOW      | Imprecision <sup>2</sup>      |
| 3                                                                          | casirivimab, imdevimab     | placebo/standard care      | 0.72             | 0.51           | 1.05           | -2.49                     | -4.43          | 0.44           | LOW          | NA                 | NA             | NA             | NA                        | NA             | NA             | NA           | 0.72              | 0.58           | 0.92           | -2.46                     | -3.81          | -0.76          | MODERATE | RoB                           |

| #                                           | Intervention 1             | Intervention 2             | DIRECT ESTIMATES |                |                |                           |                |                |              | INDIRECT ESTIMATES |                |                |                           |                |                |              | NETWORK ESTIMATES |                |                |                           |                |                | Reasons  |                    |               |
|---------------------------------------------|----------------------------|----------------------------|------------------|----------------|----------------|---------------------------|----------------|----------------|--------------|--------------------|----------------|----------------|---------------------------|----------------|----------------|--------------|-------------------|----------------|----------------|---------------------------|----------------|----------------|----------|--------------------|---------------|
|                                             |                            |                            | Relative effect  |                |                | Absolute effect per 1,000 |                |                | GRADE rating | Relative effect    |                |                | Absolute effect per 1,000 |                |                | GRADE rating | Relative effect   |                |                | Absolute effect per 1,000 |                |                |          | GRADE rating       |               |
|                                             |                            |                            | Point estimate   | CI lower limit | CI upper limit | Point estimate            | CI lower limit | CI upper limit |              | Point estimate     | CI lower limit | CI upper limit | Point estimate            | CI lower limit | CI upper limit |              | Point estimate    | CI lower limit | CI upper limit | Point estimate            | CI lower limit | CI upper limit |          |                    |               |
| 4                                           | CT-P59 monoclonal antibody | placebo/standard care      | 0.66             | 0.18           | 2.40           | -3.06                     | -7.37          | 12.61          | LOW          | NA                 | NA             | NA             | NA                        | NA             | NA             | NA           | 0.66              | 0.42           | 1.05           | -2.89                     | -5.22          | 0.38           | MODERATE | Imprecision        |               |
| 5                                           | bamlanivimab, etesevimab   | bamlanivimab               | 0.96             | 0.29           | 3.15           | NA                        | NA             | NA             | LOW          | NA                 | NA             | NA             | NA                        | NA             | NA             | NA           | 0.96              | 0.66           | 1.38           | -0.40                     | -3.66          | 2.45           | LOW      | Imprecisionx2      |               |
| 6                                           | bamlanivimab               | casirivimab, imdevimab     | NA               | NA             | NA             | NA                        | NA             | NA             | NA           | 1.28               | 0.83           | 1.95           | 1.94                      | -1.24          | 5.63           | VERY LOW     | 1.28              | 0.83           | 1.95           | 1.94                      | -1.24          | 5.63           | VERY LOW | RoB, Imprecisionx2 |               |
| 7                                           | bamlanivimab               | CT-P59 monoclonal antibody | NA               | NA             | NA             | NA                        | NA             | NA             | NA           | 1.39               | 0.78           | 2.51           | 2.37                      | -1.80          | 6.57           | LOW          | 1.39              | 0.78           | 2.51           | 2.37                      | -1.80          | 6.57           | LOW      | Imprecisionx2      |               |
| 8                                           | bamlanivimab, etesevimab   | casirivimab, imdevimab     | NA               | NA             | NA             | NA                        | NA             | NA             | NA           | 1.23               | 0.85           | 1.75           | 1.53                      | -1.09          | 4.26           | VERY LOW     | 1.23              | 0.85           | 1.75           | 1.53                      | -1.09          | 4.26           | VERY LOW | RoB, Imprecisionx2 |               |
| 9                                           | bamlanivimab, etesevimab   | CT-P59 monoclonal antibody | NA               | NA             | NA             | NA                        | NA             | NA             | NA           | 1.34               | 0.79           | 2.27           | 1.96                      | -1.80          | 5.31           | LOW          | 1.34              | 0.79           | 2.27           | 1.96                      | -1.80          | 5.31           | LOW      | Imprecisionx2      |               |
| 10                                          | casirivimab, imdevimab     | CT-P59 monoclonal antibody | NA               | NA             | NA             | NA                        | NA             | NA             | NA           | 1.08               | 0.65           | 1.84           | 0.43                      | -3.05          | 3.31           | VERY LOW     | 1.08              | 0.65           | 1.84           | 0.43                      | -3.05          | 3.31           | VERY LOW | RoB, Imprecisionx2 |               |
| <b>Time to symptom resolution (severe)</b>  |                            |                            |                  |                |                |                           |                |                |              |                    |                |                |                           |                |                |              |                   |                |                |                           |                |                |          |                    |               |
| 1                                           | convalescent plasma        | placebo/standard care      | 1.00             | 0.31           | 3.24           | 0.00                      | -10.37         | 33.61          | LOW          | NA                 | NA             | NA             | NA                        | NA             | NA             | NA           | NA                | NA             | NA             | NA                        | NA             | NA             | NA       | NA                 | Imprecisionx2 |
| <b>Time to viral clearance (non-severe)</b> |                            |                            |                  |                |                |                           |                |                |              |                    |                |                |                           |                |                |              |                   |                |                |                           |                |                |          |                    |               |
| 1                                           | bamlanivimab               | placebo/standard care      | 1.01             | 0.29           | 3.59           | 0.31                      | -17.13         | 62.07          | LOW          | NA                 | NA             | NA             | NA                        | NA             | NA             | NA           | 1.01              | 0.39           | 2.69           | 4.32                      | -15.16         | 43.19          | LOW      | Imprecisionx2      |               |
| 2                                           | bamlanivimab, etesevimab   | placebo/standard care      | 0.88             | 0.25           | 3.10           | -3.00                     | -18.08         | 50.44          | LOW          | NA                 | NA             | NA             | NA                        | NA             | NA             | NA           | 0.88              | 0.34           | 2.36           | 0.71                      | -16.24         | 34.54          | LOW      | Imprecisionx2      |               |
| 3                                           | CT-P59 monoclonal antibody | placebo/standard care      | 0.95             | 0.27           | 3.38           | -1.15                     | -17.56         | 57.04          | LOW          | NA                 | NA             | NA             | NA                        | NA             | NA             | NA           | 0.95              | 0.35           | 2.56           | 2.83                      | -15.80         | 39.55          | LOW      | Imprecisionx2      |               |
| 4                                           | bamlanivimab, etesevimab   | bamlanivimab               | 0.86             | 0.27           | 2.81           | NA                        | NA             | NA             | LOW          | NA                 | NA             | NA             | NA                        | NA             | NA             | NA           | 0.87              | 0.32           | 2.41           | -3.61                     | -35.91         | 24.94          | LOW      | Imprecisionx2      |               |
| 5                                           | bamlanivimab               | CT-P59 monoclonal antibody | NA               | NA             | NA             | NA                        | NA             | NA             | NA           | 1.06               | 0.27           | 4.26           | 1.50                      | -39.58         | 43.72          | LOW          | 1.06              | 0.27           | 4.26           | 1.50                      | -39.58         | 43.72          | LOW      | Imprecisionx2      |               |

| #                                                              | Intervention 1             | Intervention 2             | DIRECT ESTIMATES |                |                |                           |                |                |              | INDIRECT ESTIMATES |                |                |                           |                |                |              | NETWORK ESTIMATES |                |                |                           |                |                | Reasons  |                    |
|----------------------------------------------------------------|----------------------------|----------------------------|------------------|----------------|----------------|---------------------------|----------------|----------------|--------------|--------------------|----------------|----------------|---------------------------|----------------|----------------|--------------|-------------------|----------------|----------------|---------------------------|----------------|----------------|----------|--------------------|
|                                                                |                            |                            | Relative effect  |                |                | Absolute effect per 1,000 |                |                | GRADE rating | Relative effect    |                |                | Absolute effect per 1,000 |                |                | GRADE rating | Relative effect   |                |                | Absolute effect per 1,000 |                |                |          | GRADE rating       |
|                                                                |                            |                            | Point estimate   | CI lower limit | CI upper limit | Point estimate            | CI lower limit | CI upper limit |              | Point estimate     | CI lower limit | CI upper limit | Point estimate            | CI lower limit | CI upper limit |              | Point estimate    | CI lower limit | CI upper limit | Point estimate            | CI lower limit | CI upper limit |          |                    |
| 6                                                              | bamlanivimab, etesevimab   | CT-P59 monoclonal antibody | NA               | NA             | NA             | NA                        | NA             | NA             | NA           | 0.92               | 0.24           | 3.74           | -2.12                     | -41.92         | 35.78          | LOW          | 0.92              | 0.24           | 3.74           | -2.12                     | -41.92         | 35.78          | LOW      | Imprecisionx2      |
| Time to viral clearance (severe)                               |                            |                            |                  |                |                |                           |                |                |              |                    |                |                |                           |                |                |              |                   |                |                |                           |                |                |          |                    |
| --                                                             | --                         | --                         | --               | --             | --             | --                        | --             | --             | --           | --                 | --             | --             | --                        | --             | --             | --           | --                | --             | --             | --                        | --             | --             | --       | --                 |
| Transfusion-related acute lung injury [TRALI] (all severities) |                            |                            |                  |                |                |                           |                |                |              |                    |                |                |                           |                |                |              |                   |                |                |                           |                |                |          |                    |
|                                                                | convalescent plasma        | placebo/standard care      | NA               | NA             | NA             | 5.00                      | -3.00          | 12.00          | VERY LOW     | NA                 | NA             | NA             | NA                        | NA             | NA             | NA           | NA                | NA             | NA             | NA                        | NA             | NA             | NA       | RoB, Imprecisionx2 |
| Ventilator-free days (non-severe)                              |                            |                            |                  |                |                |                           |                |                |              |                    |                |                |                           |                |                |              |                   |                |                |                           |                |                |          |                    |
| --                                                             | --                         | --                         | --               | --             | --             | --                        | --             | --             | --           | --                 | --             | --             | --                        | --             | --             | --           | --                | --             | --             | --                        | --             | --             | --       | --                 |
| Ventilator-free days (severe)                                  |                            |                            |                  |                |                |                           |                |                |              |                    |                |                |                           |                |                |              |                   |                |                |                           |                |                |          |                    |
|                                                                | convalescent plasma        | placebo/standard care      | -0.68            | -1.77          | 0.41           | NA                        | NA             | NA             | LOW          | NA                 | NA             | NA             | NA                        | NA             | NA             | NA           | NA                | NA             | NA             | NA                        | NA             | NA             | NA       | RoB, Imprecision   |
| Viral clearance (non-severe)                                   |                            |                            |                  |                |                |                           |                |                |              |                    |                |                |                           |                |                |              |                   |                |                |                           |                |                |          |                    |
| 1                                                              | bamlanivimab               | placebo/standard care      | 0.90             | 0.25           | 3.29           | -13.97                    | -117.23        | 227.59         | LOW          | NA                 | NA             | NA             | NA                        | NA             | NA             | NA           | 0.90              | 0.28           | 3.06           | 2.25                      | -112.51        | 215.56         | LOW      | Imprecisionx2      |
| 2                                                              | bamlanivimab, etesevimab   | placebo/standard care      | 1.31             | 0.34           | 5.09           | 40.53                     | -101.05        | 334.66         | LOW          | NA                 | NA             | NA             | NA                        | NA             | NA             | NA           | 1.31              | 0.37           | 4.71           | 56.90                     | -97.43         | 319.25         | LOW      | Imprecisionx2      |
| 3                                                              | convalescent plasma        | placebo/standard care      | 2.01             | 0.94           | 4.66           | 118.36                    | -8.27          | 312.38         | VERY LOW     | NA                 | NA             | NA             | NA                        | NA             | NA             | NA           | 2.05              | 0.92           | 5.31           | 131.58                    | -15.37         | 347.87         | VERY LOW | RoB, Imprecisionx2 |
| 4                                                              | CT-P59 monoclonal antibody | placebo/standard care      | 1.66             | 0.48           | 5.78           | 81.66                     | -77.53         | 366.19         | LOW          | NA                 | NA             | NA             | NA                        | NA             | NA             | NA           | 1.67              | 0.53           | 5.21           | 94.45                     | -71.59         | 352.46         | LOW      | Imprecisionx2      |
| 5                                                              | bamlanivimab, etesevimab   | bamlanivimab               | 1.46             | 0.39           | 5.43           | NA                        | NA             | NA             | LOW          | NA                 | NA             | NA             | NA                        | NA             | NA             | NA           | 1.45              | 0.41           | 4.85           | 54.66                     | -123.06        | 261.93         | LOW      | Imprecisionx2      |
| 6                                                              | bamlanivimab               | convalescent plasma        | NA               | NA             | NA             | NA                        | NA             | NA             | NA           | 0.44               | 0.09           | 1.84           | -129.33                   | -377.89        | 119.28         | VERY LOW     | 0.44              | 0.09           | 1.84           | -129.33                   | -377.89        | 119.28         | VERY LOW | RoB, Imprecisionx2 |
| 7                                                              | bamlanivimab               | CT-P59 monoclonal antibody | NA               | NA             | NA             | NA                        | NA             | NA             | NA           | 0.55               | 0.10           | 2.92           | -92.20                    | -368.71        | 171.87         | LOW          | 0.55              | 0.10           | 2.92           | -92.20                    | -368.71        | 171.87         | LOW      | Imprecisionx2      |



## Living network meta-analysis protocol and extended methods

### Therapies for treatment and prophylaxis of COVID-19: introduction and methods for a living systematic review and network meta-analyses

*An international collaborative project*

#### Correspondence to

Reed AC Siemieniuk

[reed.siemieniuk@medportal.ca](mailto:reed.siemieniuk@medportal.ca)

#### Abstract

*Objectives:* To compare the effects of therapies for prophylaxis and treatment of COVID-19

*Design:* Living systematic review and network meta-analysis (NMA).

*Data sources:* U.S. Centers for Disease Control and Prevention (CDC) COVID-19 Research Articles Downloadable Database, which includes 25 electronic databases.

*Study selection:* We will include randomized clinical trials (RCT) in which persons exposed to COVID-19 or with suspected, probable or confirmed COVID-19 were treated with pharmaceuticals or blood products aimed at prophylaxis or treatment. Pairs of independent reviewers will screen in duplicate title and abstract and full text of potentially eligible articles.

*Methods:* After duplicate data abstraction, we will conduct a Bayesian-random effects network meta-analysis for each of the outcomes of interest. We will assess the risk of bias of the included studies using a modification of the Cochrane Risk of Bias 2.0 tool, and the certainty of the evidence using the GRADE approach for NMA. We will classify the interventions in groups from the most to the least effective/ harmful following GRADE guidance using a minimally contextualized approach.

*Publication and Updating of Results:* We will publish and update the results in *The BMJ* and [magicapp.org](http://magicapp.org). We will update the living NMA when the question is no longer of clinical importance, or new evidence that might impact on the conclusions is unlikely to be forthcoming.

#### Background

COVID-19 is a rapidly evolving global health emergency. As of 27 May 2020, over 5.6 million people have been infected and of these, 335,000 have died,<sup>1</sup> resulting in an enormous perceived need to implement a possibly effective intervention. Public figures,<sup>2</sup> guideline bodies,<sup>3</sup> and government agencies<sup>4</sup> have suggested using interventions without established benefit. Clinicians have responded to these suggestions by administering such interventions to large numbers of patients.<sup>5</sup>

With many teams conducting randomized clinical trials (RCTs) of drug interventions—over 1,000 intervention trials registered as of 10 May 2020<sup>6</sup>—evidence on the comparative effectiveness of drug interventions will emerge rapidly. The new environment will amplify the need for evidence based medicine: distinguishing trustworthy from untrustworthy evidence, interpreting the results, and judging net benefits of interventions against standard treatment and one another.<sup>7</sup>

Reliable guidance for COVID-19 will require adherence to standards of trustworthy clinical practice guidelines,<sup>8</sup> including methodically rigorous and rapidly updated evidence summaries. Such summaries will identify interventions with sufficient evidence of net benefit to warrant use. Establishing absence of net benefit in



previously highly touted interventions may be equally important. Further, if studies suggest that more than one intervention provides net benefit, clinicians and patients will face the challenge of deciding which intervention to use.

Our living systematic review and network meta-analysis (NMA), updated in real time, will answer this urgent demand for trustworthy evidence on the available therapeutic options. This systematic review is part of the *BMJ Rapid Recommendations* project, a collaborative effort from the MAGIC Evidence Ecosystem Foundation ([www.magicproject.org](http://www.magicproject.org)) and *The BMJ*. Our living NMA will thus directly inform *BMJ Rapid Recommendations*,<sup>9</sup> providing trustworthy, actionable, and living guidance to clinicians and patients soon after new and potentially practice-changing evidence is made available. The living NMA will be freely available in user-friendly formats, through *The BMJ* and MAGICapp ([www.magicapp.org](http://www.magicapp.org)), and ready for re-use and adaptation at national and local levels.

## Methods

### Structure and organization

The team working in the development of this living systematic review and NMA is composed of the following groups:

- a. Oversight group composed of experts in the clinical area and systematic review methodology (RAC, TA, GHG, BR, FL, SM, PV). The role of this team is to ensure that the process follows the highest methodological standards, and that the decisions made are clinically sensible and keep consistency with the needs of the *BMJ Rapid Recommendations*.
- b. Core systematic review team leaders. This group is composed of methodologists leading teams in charge of study identification (JB), data abstraction (DZ), data analysis (LG), and assessment of certainty of the evidence and presentation (RBP).
- c. Reviewers. This team is composed of clinicians, graduate students, methodologists, and biostatisticians conducting or providing advice for screening, data abstraction, and assessments of certainty of the evidence.

In addition, decisions in this protocol have been made considering the requirements from the *Rapid Recommendations* guideline panel, which includes patients.

### Eligibility criteria

We will include RCTs in which persons exposed to COVID-19 or with suspected, probable, or confirmed COVID-19 are treated with pharmacologic or blood products aimed at prophylaxis or treatment. We will include trials in which researchers compare any intervention against another or against no intervention, placebo, or standard of care, and report any outcome. We will include trials that report results regardless of publication status (peer-reviewed, in press, or pre-print, but not news reports alone) or language. There will be no restrictions on acuity of disease, nor setting.

We will include trials of pharmaceuticals, blood products, vitamins, minerals and, if the drug is one specific molecule, Chinese medicines. We will exclude quasi-randomized studies and randomized trials evaluating external organ support, plasma exchange, oxygen delivery, ventilation strategies, vaccination, nutrition, traditional Chinese herbal medicines (that typically include more than one molecule or a molecule without specific molecular weighted dosing), exercise/rehabilitation, psychological and educational interventions, personal protective equipment, or any other non-drug supportive care interventions.

### Data sources and searches



We will search the U.S. Centers for Disease Control and Prevention (CDC) COVID-19 Research Articles Downloadable Database for eligible studies—the most comprehensive database of COVID-19 research articles from December 2019 and which is maintained by the Stephen B. Thacker CDC library<sup>10</sup>. We will update our search daily Monday to Friday to match the update schedule of the database. The database includes 25 bibliographic and grey literature sources: Medline (Ovid and PubMed), PubMed Central, Embase, CAB Abstracts, Global Health, PsycInfo, Cochrane Library, Scopus, Academic Search Complete, Africa Wide Information, CINAHL, ProQuest Central, SciFinder, the Virtual Health Library, LitCovid, WHO COVID-19 website, CDC COVID-19 website, Eurosurveillance, China CDC Weekly, Homeland Security Digital Library, ClinicalTrials.gov, bioRxiv (preprints), medRxiv (preprints), chemRxiv (preprints), and SSRN (preprints).

We will filter the results from the CDC's database through a validated and highly sensitive machine learning model to identify RCTs.<sup>11</sup> We will track preprints of RCTs until publication and data updated to match that in the peer-reviewed publication when discrepant. In addition, we will search six Chinese databases on a biweekly basis: Wanfang, CBM, CNKI, VIP, Chinese Medical Journal Net (preprints), and ChinaXiv (preprints). The search terms for COVID-19 developed by the CDC have been adapted to the Chinese language. For the search of the Chinese literature, we will also include search terms for randomized trials. The search strategy is available in the Supplementary Material.

We will also monitor living evidence retrieval services on an ongoing basis. Two such services are the Systematic and Living Map on COVID-19 Evidence by the Norwegian Institute of Public Health, in collaboration with the Cochrane Canada Centre at McMaster University,<sup>12</sup> and the Living Overview of Evidence (L·OVE) by Epistemonikos Foundation.<sup>13</sup> Our publication will be accompanied with a public call for information sharing, with hopes that investigators will initiate contact and share information when available. RCTs may also be identified organically through informal networks.

### **Study selection**

Pairs of reviewers will independently and in duplicate screen titles and abstracts followed by full texts. A third reviewer will adjudicate conflicts.

### **Data extraction**

For each eligible trial, two reviewers, who have undergone training and have completed calibration exercises, will extract data independently and in duplicate using a standardised, pilot-tested data extraction form. Discrepancies will be resolved by discussion, and when necessary adjudicated by a third person. The study characteristics and baseline participant information that will be extracted is presented in Box 1.

**Box 1.** Study characteristics and baseline participant information that will be extracted

- Geographic location
- Physical location (outpatient, inpatient, intensive care)
- Patient and public involvement in the study design or interpretation
- Funder (public, private)
- Number randomized
- Number randomized to each intervention
- Dose, frequency, route of administration, and duration for each intervention
- Number who received each intervention
- Mean age
- Percent male
- Severity of illness (non-severe, severe, critically ill)
- Mean oxygen saturation on room air, or mean baseline amount of supplemental oxygen
- Percent receiving mechanical ventilation at baseline
- Percent current and former smokers
- Percent with hypertension
- Percent with underlying chronic respiratory condition including chronic obstructive pulmonary disease (COPD), asthma, and others
- Percent with diabetes
- Percent taking angiotension-converting-enzyme (ACE) inhibitors or angiotensin receptor blockers (ARBs)
- Mean alanine aminotransferase (ALT)
- Mean C-reactive protein (CRP)
- Mean d-dimer
- Mean lactate dehydrogenase (LDH)
- Mean lymphocyte count, and percent with lymphopaenia

**Outcomes**

We will begin by focusing on the patient-important outcomes listed below, based on the WHO's candidate core outcome set.<sup>14</sup> The list of outcomes may be modified at the discretion of the BMJ *Rapid Recommendations* standing panel of experts, which includes frontline healthcare workers and patient-partners. As harms are typically specific to individual pharmacologic therapies, these outcomes will be selected at the time they are needed to support specific linked Rapid Recommendations. We will extract the outcome data closest to the prespecified outcome time point.

The initial outcomes examined for the studies of treatment will include:

- Mortality (time frame: closest to 90 days)
- Mechanical ventilation in patients not initially mechanically ventilated (time frame: closest to 90 days)
- Duration of hospitalization
- Admission to hospital (time frame: closest to 28 days)
- Adverse effects leading to discontinuation of the intervention (time frame: closest to 28 days)
- Time to symptom resolution
- Time until the amount of SARS-CoV2 viral particles is below the threshold set by the RCT authors for being likely no longer infectious (as a surrogate for transmissibility)
- Undetectable nCoV-19 by PCR (time frame: closest to 7 days and not less than 4 days or more than 10 days)

The initial outcomes examined for the studies of prophylaxis will include:

- Symptomatic SARS-CoV2 infection (time frame: closest to 28 days)
- Mortality (time frame: closest to 90 days)
- Admission to hospital (time frame: closest to 28 days)
- Adverse effects leading to discontinuation of the intervention (time frame: closest to 28 days)
- Time to symptom resolution (those not infected will be considered 0)

Other outcomes that will be extracted and reported from the trials, but not initially reviewed will include:

- Ventilator-free days (time frame: 28 days)
- Venous thromboembolism (time frame: closest to 90 days)
- Clinically important bleeding (time frame: closest to 90 days)

### **Risk of bias assessments**

Following calibration exercises, two reviewers, working independently and in duplicate, will use the Clinical Advances Through Research and Information Translation (CLARITY) revisions of the Cochrane tool for assessing risk of bias in randomized trials (RoB 2.0) to rate trials as either ‘low risk of bias’, ‘some concerns – probably low risk of bias’, ‘some concerns – probably high risk of bias’ and ‘high risk of bias’, across the following domains: bias arising from the randomization process, bias due to departures from the intended intervention, bias due to missing outcome data, bias in measurement of the outcome, bias in selection of the reported results.<sup>15 16</sup> The response choice ‘some concerns’ was modified to include a judgement about whether the concerns probably do or do not result in high risk of bias.<sup>16</sup> We will not consider judgements about applicability when considering risk of bias because applicability is judged separately within indirectness domain of the GRADE framework.<sup>17</sup> In addition, the modified tool includes an additional domain to assess risk of bias related to RCTs stopping early for benefit.<sup>18</sup> Reviewers will resolve discrepancies by discussion, and when not possible, adjudication by a third-party research methodologist. A detailed guide for our risk of bias assessments is available in the Supplementary Material. If the body of evidence is rated as high risk of bias for missing data only (i.e., no serious concerns with any other of the risk of bias domains), we may perform sensitivity analyses with worst plausible assumptions to see if results remain robust to missing data.

### **Treatment nodes**

We will perform three separate network meta-analyses: i) pharmacologic treatments for patients with suspected or confirmed COVID-19, ii) blood products for treatment of patients with suspected or confirmed COVID-19, and iii) pharmacologic prophylactic therapy for people exposed to COVID-19.

Treatments will be grouped into common nodes based on molecule but not dose or duration: we will include all doses and durations of the same medication in a single treatment node. When an intervention includes more than one medication, it will be included as a separate node. We will include drugs from the same class within the same node. Chloroquine and hydroxychloroquine will be included in the same node for COVID-19 specific effects and separated for disease-independent adverse effects. Prespecified nodes include angiotensin-converting enzyme inhibitors and angiotensin receptor blockers, anti-interleukin-6 agents (i.e., tocilizumab, sarilumab), glucocorticoids, interferons, JAK inhibitors, statins, antiplatelet agents, and anticoagulants. Antibiotics will be grouped into nodes by class (e.g., macrolides, beta-lactams). The NMA oversight group and the linked Rapid Recommendation panels will make final decisions on how to group treatment nodes.

### **Data synthesis**

We will perform random-effects pairwise meta-analysis for each comparison for each outcome using the Bayesian framework. We will use a plausible prior for variance parameter,<sup>19</sup> and uniform prior for the effect parameter. We will calculate Ratio of Means (RoM) and corresponding 95% credible intervals (CrIs) for continuous outcomes in which we expect variation across populations (time to symptoms resolution and time to viral clearance) and

mean differences (MDs) and corresponding 95% credible intervals (CrIs) for other continuous outcomes. For dichotomous outcomes, we will calculate odds ratios (ORs) with corresponding CrIs. Absolute effects will be calculated based on the ORs and baseline risk of standard of care.<sup>20</sup> We will create a funnel plot to assess the publication bias when 10 or more studies are available for a specific direct comparison.<sup>21</sup>

We will conduct a random-effects network meta-analysis using the Bayesian framework with same priors for the variance and effect parameters.<sup>19</sup> We will use three Markov-chains with 100,000 iterations after an initial burn-in of 10,000 and a thinning of 10. We will assess the convergence based on trace plots and the Brooks-Gelman-Rubin statistic, with an acceptable threshold of <1.05 for all nodes. If convergence is not achieved, then we will use 500,000 iterations and a burn-in of 50,000 iterations and a thinning of 10. We will use automated generation of node-splitting models to assess local incoherence and to obtain indirect estimates.<sup>22</sup> We will estimate ranking probabilities and calculate surface under the cumulative ranking curves (SUCRA). For all dichotomous outcomes, we will calculate the absolute treatment effects of the network estimates based-on the odds ratios and the baseline risk using the transitive risks model.<sup>23</sup> To obtain the baseline risk, we will use the highest quality prognostic evidence available at the time of publication, typically based on a systematic review of prognostic studies.<sup>24</sup>

When networks are sparse, between-study heterogeneity variances are often imprecisely estimated. That may generate implausibly wide credible intervals from network estimates, even when the direct and indirect estimates are coherent.<sup>25</sup> When this occurs, we will conduct sensitivity analyses by using empirically informative priors,<sup>26</sup> and fixed effects models.<sup>25</sup> Another situation in which implausibly wide confidence intervals occur is with random effects when the number of studies is small and the heterogeneity is considerable, particularly when study size varies markedly. This is a second situation in which we may opt for fixed effect models.

Pairwise meta-analysis will be conducted using the bayesmeta package of R version 4.0.0 (RStudio, Boston, MA).<sup>27</sup> All network meta-analyses will be performed using the *gemtc* package of R version 4.0.0 (RStudio, Boston, MA),<sup>28</sup> absolute effects in networks will be calculated using *R2jags* package of R version 4.0.0 (RStudio, Boston, MA)<sup>29</sup>. *networkplot* command of Stata version 15.1 (StataCorp, College Station, Texas, USA) will be used to draw the network plots with thickness of edges of the nodes based on inverse variance.<sup>30</sup> The foundational R code that we will use is available in the Supplementary Material.

### Subgroups and sensitivity analyses

We will conduct sensitivity analyses and network meta-regression to explore factors that may modify the comparative effect estimates. Specific analyses will be guided by the linked *Rapid Recommendation* guideline panels with the directive to explore a limited number of pre-defined subgroup effects with a specified rationale and anticipated direction of the effect. When sufficient heterogeneity in risk of bias exists, we will perform subgroup analyses comparing studies at low versus high risk of bias. We will classify all studies with at least 1 domain judged at high risk of bias or probably high risk of bias as a high risk of bias study. Ultimately, we will base decisions regarding the credibility of subgroup analyses on the ICEMAN instrument,<sup>31</sup> and follow GRADE guidance on how to deal with low, intermediate, and high credibility subgroup effects.<sup>32</sup>

For all outcomes, we will first include both peer-reviewed and non-peer reviewed data, and then perform a sensitivity analysis by restricting to peer-reviewed publications. When the guideline panel makes a recommendation about a drug class with more than one drug, we will consider performing a sensitivity analysis with individual molecules rather than drug class as the nodes.

### Certainty assessment

We will evaluate the certainty of evidence using the GRADE approach for network meta-analysis.<sup>33-35</sup> We will rate the certainty for each comparison and outcome as high, moderate, low, or very low, based on considerations of risk of bias, inconsistency, indirectness, publication bias, intransitivity, incoherence, and imprecision. If and when sufficient effective treatments are available we will, for each outcome, use the GRADE framework to make

conclusions by classifying the interventions in groups from the most to the least effective using a minimally contextualized approach.<sup>36</sup>

### **Updating**

Full results will be updated at minimum every two weeks on webpages hosted by BMJ.com and magicapp.org. A summary of the interim results, risk of bias assessments, individual study data summaries, and the date of the search will be posted in a table within the online publication. Results will be updated more frequently if the project steering committee or the linked BMJ Rapid Recommendations guidelines panel judges that there is sufficient new information to possibly change practice and requests an earlier update. Updates will be submitted to international indexes through the mechanism for corrections but labelled as updates. Old versions and details of any changes will be dated and documented in the Supplementary Material. It may be necessary to adjust some of the processes, outcomes, and analytic methods based on the data. The systematic review team will decide together whether changes to the pre-specified protocol are needed and these changes will be documented in the methods section of the updated review.

### **External review**

A standing peer-review committee editorial staff at The BMJ, clinical experts, patients, and statistician(s) will be tasked with providing feedback on the protocol and initial publication, and a subcommittee will peer review updates. The systematic review team will respond to these comments on an urgent basis. Comments from peer reviewers and responses will be made public. The study webpage will include functionality for comments to be made by any member of the public. The systematic review team will endeavor to respond to all public comments in a timely manner.

### **Publication**

The papers will be published in a traditional format for systematic reviews and network meta-analyses. In addition, results will be published in interactive evidence summary and decision aid formats for multiple comparisons and pairwise comparisons on MAGICapp ([www.magicapp.org](http://www.magicapp.org)). The publication will include infographics that highlight the key messages from the current state of the evidence.

### **Determining the end of project**

The project will terminate at the discretion of the project oversight group, which includes representation from the MAGIC Evidence Ecosystem Foundation, The BMJ, the WHO, and international collaborators with clinical and research expertise. We anticipate that the project will end when the question is no longer of clinical importance, or new evidence that might impact on the conclusions is unlikely to be forthcoming. If the influx of new RCT results slows, then the project oversight committee may choose to decrease the frequency of updates.

### **Data access**

All extracted data will be made available publicly at the time of the updates to be shared and used freely.

### **Changes to the protocol**

All changes to the protocol are reported in Table 1 and will be updated as necessary.

### **Discussion**

Our living network meta-analysis will provide up to date information to interested users, including healthcare workers, patients, healthcare agencies, guideline bodies, and governments. It will directly inform joint clinical practice guidelines from BMJ Rapid Recommendations.

We anticipate several challenges. First, living systematic reviews require substantial dedication and human resources.<sup>37</sup> To address this, we will organize our large team into smaller groups with specific responsibilities, including i) a study identification team, ii) a data extraction and management team, iii), a data analysis team, iv)

a grading and publications team, and v) an oversight team. In addition, *The BMJ* will recruit a standing external review committee that will become familiar with the research methods and respond quickly to updates.

Second, the need for recurrent updates conflicts with traditional publication formats. Frequent updates resulting in new publications can have a devastating effect on a journal's impact factor. It may also be confusing for users who want to find the most recent update. To solve this problem, we plan to i) have a reference website with the links to the latest versions, ii) use headers on previous versions stating that they are outdated with a link to the current version, iii) use PubMed's corrections mechanism so that the updated publication keeps the same digital object identifier (DOI) and PubMed identification number.

Evidence summaries will also be published online with MAGICapp ([www.magicapp.org](http://www.magicapp.org)) developed for the purpose of dynamic updating and with electronic publication formats not subject to the limitations of traditional publishing formats thus allowing presentation of evidence summaries in multilayered user-friendly formats.<sup>38</sup>

Third, the optimal methodological and statistical methods may change as the number of RCTs and participants increases. In particular, early NMAs are likely to be sparse, and we may have to use specific analytic methods to accommodate these situations.<sup>25</sup> Our oversight committee and semi-independent guideline panels will provide direction and guidance on whether and how the methods should be adopted to the current situation.

Another major concern with living systematic reviews is limitations in the evidence included, in particular bias. We will assess risk of bias of each study using a standardized tool,<sup>15 16</sup> and assess risk of bias for each comparison using the GRADE framework.<sup>33 34</sup> Publication bias is of particular concern with living reviews: studies with positive results are more likely to be published at all, and when published are likely to be published earlier.<sup>39</sup> We will use the GRADE approach, which considers publication bias, to rate certainty for the estimated effect for each comparison.<sup>21</sup> Clinical practice guideline panels of whom the majority will be independent of this review, will consider this issue when making recommendations for practice, and their scrutiny may bear on certainty of evidence judgements.<sup>9</sup>

There are at least two other groups planning a similar living systematic review and NMA.<sup>40 41</sup> More than one group performing similar analyses will allow controlled replication and the scientific community to assess reproducibility of the findings. Our review has advantages over the alternatives, including the use of and experience with GRADE for NMA, an established platform in the *BMJ Rapid Recommendations* project; an established collaboration with and early involvement of the publisher (*The BMJ*); and interpretation from a semi-independent *BMJ Rapid Recommendations* guideline panels; inclusion of a dedicated search of the Chinese literature; and co-publication in MAGICapp through its interactive multilayered evidence presentation format.

## Conclusions

The COVID-19 pandemic necessitates rapid interpretation of new evidence addressing therapeutic and prophylactic options. Our living systematic review and NMA will provide a reference point for those interested in the most trustworthy evidence regarding these therapies. Our project will facilitate the movement of evidence into practice much sooner than traditional publication methods.

**Table 1.** Changes to the protocol

| Date        | Change                                                                                               | Rationale                                                                                   |
|-------------|------------------------------------------------------------------------------------------------------|---------------------------------------------------------------------------------------------|
| 15 Jul 2020 | Network analyses will only include treatment nodes with at least 100 patients or at least 20 events. | Early analyses with sparse data resulted in implausible and uninformative effect estimates. |
| 28 Aug 2020 | Chinese databases searches will be completed monthly.                                                | Balancing feasibility with search result yield.                                             |

## References

1. John Hopkins University. Coronavirus Resource Center 2020 [Available from: <https://coronavirus.jhu.edu/map.html> accessed April 27 2020.
2. Wong JC. Hydroxychloroquine: how an unproven drug became Trump's coronavirus 'miracle cure'. *The Guardian* 2020 07/04/2020.
3. Ye Z, Rochwerg B, Wang Y, et al. Treatment of patients with nonsevere and severe coronavirus disease 2019: an evidence-based guideline. *CMAJ* 2020 doi: 10.1503/cmaj.200648 [published Online First: 2020/05/01]
4. U.S. Food and Drug Administration. Request for Emergency Use Authorization For Use of Chloroquine Phosphate or Hydroxychloroquine Sulfate Supplied From the Strategic National Stockpile for Treatment of 2019 Coronavirus Disease. In: (HHS) USDoHaHS, ed., 2020:1-8.
5. Kim AHJ, Sparks JA, Liew JW, et al. A Rush to Judgment? Rapid Reporting and Dissemination of Results and Its Consequences Regarding the Use of Hydroxychloroquine for COVID-19. *Ann Intern Med* 2020 doi: 10.7326/m20-1223 [published Online First: 2020/04/01]
6. Cytel. Global Coronavirus COVID-19 Clinical Trial Tracker 2020 [Available from: <https://www.covid19-trials.org/> accessed 6 MAY 2020.
7. World Health Organization. SUBJECT IN FOCUS: providing timely and accurate information to dispel the 'infodemic'. Coronavirus disease 2019 (COVID-19) Situation Report. Geneva, Switzerland, 2020.
8. Institute of Medicine. Institute of Medicine (US) Committee on Standards for Developing Trustworthy Clinical Practice Guidelines. Washington, DC: National Academy Press (US) 2011.
9. Siemieniuk RA, Agoritsas T, Macdonald H, et al. Introduction to BMJ Rapid Recommendations. *BMJ* 2016;354:i5191. doi: 10.1136/bmj.i5191 [published Online First: 2016/09/30]
10. The Stephen B. Thacker CDC Library. COVID-19 Research Articles Downloadable Database: U.S. Centers for Disease Control and Prevention (CDC); 2020 [Available from: <https://www.cdc.gov/library/researchguides/2019novelcoronavirus/researcharticles.html> accessed 6 May 2020.
11. Marshall IJ, Noel-Storr A, Kuiper J, et al. Machine learning for identifying Randomized Controlled Trials: An evaluation and practitioner's guide. *Res Synth Methods* 2018;9(4):602-14. doi: 10.1002/jrsm.1287 [published Online First: 2018/01/10]
12. Norwegian Institute of Public Health. NIPH systematic and living map on COVID-19 evidence 2020 [Available from: [https://www.norgesk.no/forskningskart/NIPH\\_mainMap.html](https://www.norgesk.no/forskningskart/NIPH_mainMap.html) accessed 6 May 2020.
13. EPISTEMONIKOS Foundation. Living Overview of Evidence (L-OVE) 2020 [Available from: <https://iloveevidence.com/> accessed 6 June 2020 2020.
14. WHO Working Group on the clinical characterization of COVID-19 infection. A candidate core outcome measure set for clinical research during the SARS-CoV-2/COVID-19 pandemic. Geneva, Switzerland: World Health Organization, 2020:1-16.
15. Sterne JAC, Savovic J, Page MJ, et al. RoB 2: a revised tool for assessing risk of bias in randomised trials. *BMJ (Clinical research ed)* 2019;366:l4898. doi: 10.1136/bmj.l4898 [published Online First: 2019/08/30]
16. Busse J, Guyatt G. Modification of Cochrane tool to assess risk of bias in randomized trials. 2013. <https://distillercer.com/wp-content/uploads/2014/02/Tool-to-Assess-Risk-of-Bias-in-Randomized-Controlled-Trials.docx> (accessed 6 Mar 2020).
17. Guyatt GH, Oxman AD, Kunz R, et al. GRADE guidelines: 8. Rating the quality of evidence--indirectness. *J Clin Epidemiol* 2011;64(12):1303-10. doi: 10.1016/j.jclinepi.2011.04.014 [published Online First: 2011/08/02]
18. Bassler D, Briel M, Montori VM, et al. Stopping randomized trials early for benefit and estimation of treatment effects: systematic review and meta-regression analysis. *Jama* 2010;303(12):1180-7. doi: 10.1001/jama.2010.310 [published Online First: 2010/03/25]

19. Röver C. Bayesian random-effects meta-analysis using the bayesmeta R package. *arXiv preprint arXiv:171108683* 2017
20. Guyatt G, Oxman AD, Akl EA, et al. GRADE guidelines: 1. Introduction–GRADE evidence profiles and summary of findings tables. *J Clin Epidemiol* 2011;64(4):383-94. doi: 10.1016/j.jclinepi.2010.04.026 [published Online First: 2011/01/05]
21. Guyatt GH, Oxman AD, Montori V, et al. GRADE guidelines: 5. Rating the quality of evidence--publication bias. *Journal of clinical epidemiology* 2011;64(12):1277-82. doi: 10.1016/j.jclinepi.2011.01.011 [published Online First: 2011/08/02]
22. van Valkenhoef G, Dias S, Ades AE, et al. Automated generation of node-splitting models for assessment of inconsistency in network meta-analysis. *Res Synth Methods* 2016;7(1):80-93. doi: 10.1002/jrsm.1167 [published Online First: 2015/10/16]
23. Spineli L, Brignardello-Petersen R, Heen A, et al. Obtaining absolute effect estimates to facilitate shared decision making in the context of multiple comparisons. Global Evidence Summit. Cape Town, South Africa, 2017.
24. Foroutan F, Guyatt G, Zuk V, et al. GRADE Guidelines 28: Use of GRADE for the assessment of evidence about prognostic factors: rating certainty in identification of groups of patients with different absolute risks. *Journal of clinical epidemiology* 2020;121:62-70. doi: 10.1016/j.jclinepi.2019.12.023 [published Online First: 2020/01/27]
25. Brignardello-Petersen R, Murad MH, Walter SD, et al. GRADE approach to rate the certainty from a network meta-analysis: avoiding spurious judgments of imprecision in sparse networks. *J Clin Epidemiol* 2019;105:60-67. doi: 10.1016/j.jclinepi.2018.08.022 [published Online First: 2018/09/27]
26. Turner RM, Davey J, Clarke MJ, et al. Predicting the extent of heterogeneity in meta-analysis, using empirical data from the Cochrane Database of Systematic Reviews. *Int J Epidemiol* 2012;41(3):818-27. doi: 10.1093/ije/dys041 [published Online First: 2012/03/31]
27. Röver C. Bayesian random-effects meta-analysis using the bayesmeta R~package. *Journal of Statistical Software* 2020;93(6):1-51. doi: 10.18637/jss.v093.i06
28. gemtc: Network Meta-Analysis Using Bayesian Methods [program]. R package version 0.8-4 version, 2020.
29. R2jags: Using R to Run 'JAGS' [program]. R package version 0.6-1 version, 2020.
30. Chaimani A, Higgins JP, Mavridis D, et al. Graphical tools for network meta-analysis in STATA. *PLoS One* 2013;8(10):e76654. doi: 10.1371/journal.pone.0076654 [published Online First: 2013/10/08]
31. Schandelmaier S, Briel M, Varadhan R, et al. A new instrument to assess the credibility of effect modification analyses (ICEMAN) in randomized controlled trials and meta-analyses *CMAJ [In Press]* 2020
32. Guyatt GH, Oxman AD, Kunz R, et al. GRADE guidelines: 7. Rating the quality of evidence--inconsistency. *J Clin Epidemiol* 2011;64(12):1294-302. doi: 10.1016/j.jclinepi.2011.03.017 [published Online First: 2011/08/02]
33. Brignardello-Petersen R, Bonner A, Alexander PE, et al. Advances in the GRADE approach to rate the certainty in estimates from a network meta-analysis. *J Clin Epidemiol* 2018;93:36-44. doi: 10.1016/j.jclinepi.2017.10.005 [published Online First: 2017/10/21]
34. Puhan MA, Schunemann HJ, Murad MH, et al. A GRADE Working Group approach for rating the quality of treatment effect estimates from network meta-analysis. *Bmj* 2014;349:g5630. doi: 10.1136/bmj.g5630 [published Online First: 2014/09/26]
35. Brignardello-Petersen R, Mustafa RA, Siemieniuk RAC, et al. GRADE approach to rate the certainty from a network meta-analysis: Addressing Incoherence. *J Clin Epidemiol* 2018 doi: 10.1016/j.jclinepi.2018.11.025 [published Online First: 2018/12/12]
36. Brignardello-Petersen R, Florez I, Izcovich A, et al. GRADE approach to drawing conclusions from a network meta-analysis using a minimally contextualized framework [Submitted for publication]. 2020



37. Elliott JH, Synnot A, Turner T, et al. Living systematic review: 1. Introduction-the why, what, when, and how. *Journal of clinical epidemiology* 2017;91:23-30. doi: 10.1016/j.jclinepi.2017.08.010 [published Online First: 2017/09/16]
38. Agoritsas T, Heen AF, Brandt L, et al. Decision aids that really promote shared decision making: the pace quickens. *BMJ (Clinical research ed)* 2015;350:g7624. doi: 10.1136/bmj.g7624 [published Online First: 2015/02/12]
39. Hopewell S, Loudon K, Clarke MJ, et al. Publication bias in clinical trials due to statistical significance or direction of trial results. *Cochrane Database Syst Rev* 2009(1):Mr000006. doi: 10.1002/14651858.MR000006.pub3 [published Online First: 2009/01/23]
40. Boutron I, Chaimani A, Devane D, et al. Interventions for preventing and treating COVID-19: protocol for a living mapping of research and a living systematic review. *Zenodo* 2020. <http://doi.org/10.5281/zenodo.3744600> (accessed 10 May 2020).
41. Juul S, Nielsen N, Bentzer P, et al. Interventions for treatment of COVID-19: a protocol for a living systematic review with network meta-analysis including individual patient data (The LIVING Project). *Syst Rev* 2020;9(1):108. doi: 10.1186/s13643-020-01371-0
